# Supplementary material for: Hypertension prevalence alteration in 92 815 nurses based on the new standard by 2017 ACC/AHA hypertension guideline: observational cross-sectional study from China
Source: PubMed Central journal article supplement — BMJ Open. 2019 Aug 30;9(8):e027201. doi: 10.1136/bmjopen-2018-027201 (PMC6720136; doi:10.1136/bmjopen-2018-027201), 2019-08-30
Supplement: bmjopen-2018-027201.draft_revisions.pdf [file bmjopen-2018-027201.draft_revisions.pdf]

# BMJ Open

BMJ Open is committed to open peer review. As part of this commitment we make the peer review history of every article we publish publicly available.

When an article is published we post the peer reviewers' comments and the authors' responses online. We also post the versions of the paper that were used during peer review. These are the versions that the peer review comments apply to.

The versions of the paper that follow are the versions that were submitted during the peer review process. They are not the versions of record or the final published versions. They should not be cited or distributed as the published version of this manuscript.

BMJ Open is an open access journal and the full, final, typeset and author-corrected version of record of the manuscript is available on our site with no access controls, subscription charges or pay-per-view fees (<http://bmjopen.bmj.com>).

If you have any questions on BMJ Open's open peer review process please email [info.bmjopen@bmj.com](mailto:info.bmjopen@bmj.com)

# BMJ Open

## The Prevalence of Hypertension in 92815 Chinese Nurses and its Changes according to the 2017 ACC/AHA Hypertension Guideline

|                               |                                                                                                                                                                                                                                                                                                                                                                                                                                                                                                                                                                                                                                                                                                                                                                                                                                                                                                                                                                                                                                                                                                                                                                                                                                                                                                                                                                                                                                                                                                                                                                                                                                                                                        |
|-------------------------------|----------------------------------------------------------------------------------------------------------------------------------------------------------------------------------------------------------------------------------------------------------------------------------------------------------------------------------------------------------------------------------------------------------------------------------------------------------------------------------------------------------------------------------------------------------------------------------------------------------------------------------------------------------------------------------------------------------------------------------------------------------------------------------------------------------------------------------------------------------------------------------------------------------------------------------------------------------------------------------------------------------------------------------------------------------------------------------------------------------------------------------------------------------------------------------------------------------------------------------------------------------------------------------------------------------------------------------------------------------------------------------------------------------------------------------------------------------------------------------------------------------------------------------------------------------------------------------------------------------------------------------------------------------------------------------------|
| Journal:                      | <i>BMJ Open</i>                                                                                                                                                                                                                                                                                                                                                                                                                                                                                                                                                                                                                                                                                                                                                                                                                                                                                                                                                                                                                                                                                                                                                                                                                                                                                                                                                                                                                                                                                                                                                                                                                                                                        |
| Manuscript ID                 | bmjopen-2018-027201                                                                                                                                                                                                                                                                                                                                                                                                                                                                                                                                                                                                                                                                                                                                                                                                                                                                                                                                                                                                                                                                                                                                                                                                                                                                                                                                                                                                                                                                                                                                                                                                                                                                    |
| Article Type:                 | Research                                                                                                                                                                                                                                                                                                                                                                                                                                                                                                                                                                                                                                                                                                                                                                                                                                                                                                                                                                                                                                                                                                                                                                                                                                                                                                                                                                                                                                                                                                                                                                                                                                                                               |
| Date Submitted by the Author: | 26-Oct-2018                                                                                                                                                                                                                                                                                                                                                                                                                                                                                                                                                                                                                                                                                                                                                                                                                                                                                                                                                                                                                                                                                                                                                                                                                                                                                                                                                                                                                                                                                                                                                                                                                                                                            |
| Complete List of Authors:     | <p>zhao, bin; The second hospital of Hebei medical university, nursing department</p> <p>li, jing; The second hospital of Hebei medical university, nursing department</p> <p>liu, jie; The second hospital of Hebei medical university, nursing department</p> <p>hao, yuming; The second hospital of Hebei medical university , department of cardiology</p> <p>zhen, yanjie; The second hospital of Hebei medical university, department of cardiology</p> <p>feng, di; The second hospital of Hebei medical university, nursing department</p> <p>xu, menghui; The second hospital of Hebei medical university, nursing department</p> <p>chen, ximin; The second hospital of Baoding, nursing department</p> <p>yang, xiulan; Tangshan Gongren Hospital, nursing department</p> <p>zuo, aifang; Handan central hospital , nursing department</p> <p>jia, rufu; Cangzhou central hospital, neurology hospital</p> <p>zhang, ruiqin; The second affiliated hospital of Xingtai medical college, nursing department</p> <p>fan, ailing; The people's hospital of Langfang city, nursing department</p> <p>wang, yun; The first hospital of Qinhuangdao, nursing department</p> <p>yuan, meijin; The first affiliated hospital of Hebei north university, nursing department</p> <p>tong, li; Harrison international peace hospital, nursing department</p> <p>chen, shuling; Chengde central hospital, nursing department</p> <p>cui, jing; Dingzhou maternal and child health care hospital, nursing department</p> <p>zhao, meizhu; The first hospital of Xinji, nursing department</p> <p>cui, wei; The second hospital of Hebei medical university, department of cardiology</p> |
| Keywords:                     | Hypertension < CARDIOLOGY, nurses, prevalence, guideline                                                                                                                                                                                                                                                                                                                                                                                                                                                                                                                                                                                                                                                                                                                                                                                                                                                                                                                                                                                                                                                                                                                                                                                                                                                                                                                                                                                                                                                                                                                                                                                                                               |

1  
2  
3  
4  
5  
6  
7  
8  
9  
10  
11  
12  
13  
14  
15  
16  
17  
18  
19  
20  
21  
22  
23  
24  
25  
26  
27  
28  
29  
30  
31  
32  
33  
34  
35  
36  
37  
38  
39  
40  
41  
42  
43  
44  
45  
46  
47  
48  
49  
50  
51  
52  
53  
54  
55  
56  
57  
58  
59  
60

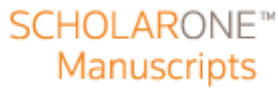

1  
2  
3  
4 **The Prevalence of Hypertension in 92815 Chinese Nurses and its Changes**  
5  
6 **according to the 2017 ACC/AHA Hypertension Guideline**  
7  
8

9 Bin Zhao, Jing Li, Jie Liu, Yuming Hao, Yanjie Zhen, Di Feng, Menghui Xu, Ximin Chen,  
10 Xiulan Yang, Aifang Zuo, Rufu Jia, Ruiqin Zhang, Ailing Fan, Yun Wang, Meijin Yuan, Li  
11 Tong, Shuling Chen, Jing Cui, Meizhu Zhao, Wei Cui  
12  
13  
14  
15

16 Bin Zhao, RN, Professor, Head of the nursing department, The Second Hospital of Hebei  
17 medical university, Shijiazhuang, China;  
18  
19

20 Jing Li, RN, nursing department, The second hospital of Hebei medical university, Shijiazhuang,  
21 China;  
22  
23

24 Jie Liu, nursing department, RN, The second hospital of Hebei medical university, Shijiazhuang,  
25 China;  
26  
27

28 Yuming Hao, MD, Professor, department of cardiology, The second hospital of Hebei medical  
29 university, Shijiazhuang, China  
30  
31

32 Yanjie Zhen, RN, Head nurse, department of cardiology, The second hospital of Hebei medical  
33 university, Shijiazhuang, China;  
34  
35

36 Di Feng, RN, nursing department, The second hospital of Hebei medical university,  
37 Shijiazhuang, China;  
38  
39

40 Menghui Xu, RN, nursing department, The second hospital of Hebei medical university,  
41 Shijiazhuang, China;  
42  
43

44 Ximin Chen, RN, Head of the nursing department, The second hospital of Baoding, Baoding,  
45 China;  
46  
47

48 Xiulan Yang, RN, Head of the nursing department, Tangshan gongren hospital, Tangshan,  
49 China;  
50  
51

52 Aifang Zuo, RN, Head of the nursing department, Handan central hospital, Handan, China;  
53  
54  
55  
56  
57  
58  
59  
60

1  
2  
3 Rufu Jia, RN, Vice president of hospital, Cangzhou central hospital, Cangzhou, China;  
4

5  
6 Ruiqin Zhang, RN, Head of the nursing department, The Second affiliated hospital of Xingtai  
7 medical college, Xingtai, China;  
8

9  
10 Ailing Fan, RN, Head of the nursing department, The people's hospital of Langfang city,  
11 Langfang, China;  
12

13  
14 Yun Wang, RN, Head of the nursing department, The first hospital of Qinhuangdao,  
15 Qinhuangdao, China;  
16

17  
18 Meijin Yuan, RN, Head of the nursing department, The first affiliated hospital of Hebei north  
19 university, Zhangjiakou, China;  
20

21  
22 Li Tong, RN, Head of the nursing department, Harrison international peace hospital, Hengshui,  
23 China;  
24

25  
26 Shuling Chen, RN, Head of the nursing department, Chengde central hospital, Chengde, China;  
27

28  
29 Jing Cui, RN, Head of the nursing department, Dingzhou maternal and child health care  
30 hospital, Dingzhou, China;  
31

32  
33 Meizhu Zhao, RN, Head of the nursing department, The first hospital of Xinji, Xinji, China;  
34

35  
36 Wei Cui, corresponding author, MD, department of cardiology, The second hospital of Hebei  
37 medical university, 215 heping west road, Shijiazhuang, China, cuiwei21c@163.com,  
38 860311-66002133  
39  
40  
41  
42

43 **Key words: hypertension,nurses,prevalence,guideline**  
44

45  
46 **Word count:3893**  
47

48  
49 **Abstract**  
50

51  
52  
53 **Objectives**—This study aims to analyze the status of hypertension in Chinese  
54  
55  
56  
57  
58  
59  
60

1  
2  
3  
4 nursing staff and the changes in prevalence, awareness, treatment and control rate  
5  
6 of hypertension in Chinese nursing staffs based on the 2017 American College of  
7  
8 Cardiology (ACC) /American Heart Association (AHA) High Blood Pressure  
9  
10  
11  
12  
13  
14  
15  
16  
17  
18  
19  
20  
21  
22  
23  
24  
25  
26  
27  
28  
29  
30  
31  
32  
33  
34  
35  
36  
37  
38  
39  
40  
41  
42  
43  
44  
45  
46  
47  
48  
49  
50  
51  
52  
53  
54  
55  
56  
57  
58  
59  
60

nursing staff and the changes in prevalence, awareness, treatment and control rate of hypertension in Chinese nursing staffs based on the 2017 American College of Cardiology (ACC) /American Heart Association (AHA) High Blood Pressure Guideline and the 2010 Chinese guideline for the management of hypertension.

**Design**—cross-sectional study.

**Setting**—512 medical institutions in 13 cities in Hebei province.

**Participants**—The entire group of registered nurses from 512 medical institutions in 13 cities in Hebei province(n=143772)were invited to participate in the survey and and those who refused to participate were excluded.93603 incumbent nurses aged 18-65 years agreed to participate in the survey and submitted questionnaires online.A response rate of 65.11% was achieved. After excluding 788 individuals with missing or incomplete questionnaires,92815 participants were included in the final analyses.

**Main outcome measures**—The prevalence, awareness, treatment and control rate of hypertension.

**Results**—92815 participants were included in the final analyses,among which 3,677 men (3.96%) and 8,9138 women (96.04%). The mean age of participants was 31.65(SD=7.47)years.

1  
2  
3  
4 There are 26,875 cases of hypertension in nursing staffs according to the 2017  
5  
6 ACC/AHA guideline, with 20,551 cases added to a previous  
7  
8 number(6,324)according to the 2010 Chinese guideline. The prevalence of  
9  
10 hypertension among nursing staffs was 28.96% in the context of the 2017  
11  
12 ACC/AHA guideline, 3.25 times higher than that (6.81%) evaluated by the  
13  
14 criteria of the 2010 Chinese guideline .However, the awareness, treatment and  
15  
16 control rate (13.50%,10.73%,0.81%) were 3.25, 3.22 and 17.48 times lower than  
17  
18 those (57.37%,45.30%,14.97%) based on the 2010 Chinese guideline,  
19  
20 respectively.  
21  
22  
23  
24  
25  
26  
27

28 **Conclusions**—There is still much room for improvement in the awareness rate,  
29  
30 drug treatment rate and control rate of hypertension among nurses. Meanwhile,  
31  
32 according to the 2017 ACC/AHA guideline, the prevalence of hypertension in  
33  
34 China will increase significantly, which poses a more severe challenge to the  
35  
36 management of hypertension in China.  
37  
38  
39  
40

### 41 ***Strengths and limitations of this study***

- 42  
43  
44  
45 1.This study described the current status of the hypertension in nurses  
46  
47 according to the 2010 Chinese guideline and the 2017 ACC/AHA guideline.  
48  
49  
50  
51 2. The large representative sample of individuals from 13 cities in Hebei  
52  
53 province enhanced the generalizability of the findings.  
54  
55  
56  
57  
58  
59  
60

1  
2  
3  
4 3.The relationships between hypertension and specific factors identified in  
5  
6 this study were not investigated.  
7  
8

### 9 10 ***Introduction***

11  
12  
13 With the rapid development of society and economy, the changes of lifestyle and  
14 the aging of the population, hypertension has become one of the most important  
15 public health issues in the world. Its complications are associated with high  
16 morbidity and mortality, as well as high rate of consumption of medical resources  
17 [1]. The direct economic burden caused by hypertension in China in 2013  
18 amounted to 210.3 billion yuan, accounting for 6.61% of total expenditure on  
19 health of China<sup>[2-4]</sup>. According to the China Health and Nutrition Survey (CHNS)  
20 data from 1991 to 2011, The adjusted prevalence rate of hypertension in Chinese  
21 over 18 years old increased from 15.6% to 20.9% , the prevalence rate of  
22 hypertension increased<sup>[5]</sup>, meanwhile, the awareness, treatment and control rates  
23 were still low<sup>[6]</sup>. The level of the blood pressure among the nursing staff, (as a  
24 special class of professional groups), whose work is of high intensity and high  
25 stress level with frequent rotating shifts, should be paid more attention to. And the  
26 nursing staff, as a special class of professional groups, whose work is of high  
27 intensity, frequent rotating shift, and high stress level, blood pressure level should  
28 be paid more attention<sup>[7-8]</sup>.  
29  
30  
31  
32  
33  
34  
35  
36  
37  
38  
39  
40  
41  
42  
43  
44  
45  
46  
47  
48  
49  
50  
51  
52  
53

54  
55  
56 The 2017 American Heart Association/American College of Cardiology  
57  
58  
59



1  
2  
3  
4 (AHA/ACC) guideline for the prevention, detection, evaluation, and management  
5  
6 of high blood pressure (BP) in adults was recently released. A significant  
7  
8 transformation in the guideline is the shift in the definition of hypertension, from  
9  
10 systolic blood pressure (SBP)  $\geq 140$ mm Hg or diastolic blood pressure (DBP)  $\geq$   
11  
12 90mm Hg to systolic blood pressure (SBP)  $\geq 130$ mm Hg or diastolic blood  
13  
14 pressure(DBP)  $\geq 80$ mm Hg. According to the 2017 AHA/ACC guideline,the  
15  
16 prevalence rate of hypertension increased from 31.9% to 45.6% in the United  
17  
18 States<sup>[9]</sup>.  
19  
20  
21  
22  
23  
24

25 The 2017 ACC/AHA guideline may have important effects on the hypertension  
26  
27 status noted across the globe<sup>[10-13]</sup>.However,it is not clear that the effect of the new  
28  
29 guideline on the status of hypertension in different populations in China.The  
30  
31 purpose of this study is to analyze the variation of prevalence, awareness,  
32  
33 treatment and control rate of hypertension in Chinese nursing staffs based on the  
34  
35 2017 ACC/AHA guideline and the 2010 Chinese guideline.  
36  
37  
38  
39  
40  
41

## 42 **METHODS**

### 43 **Participants and data collection**

44  
45  
46 This cross-sectional study was conducted between October 2016 to February  
47  
48 2017,using general survey design.The entire group of registered nurses from 512  
49  
50 medical institutions in 13 cities in Hebei province(n=143772) were invited to  
51  
52  
53  
54  
55  
56  
57  
58  
59  
60

1  
2  
3  
4 participate in the survey and those who refused to participate were  
5  
6 excluded.93603 incumbent nurses aged 18-65 years agreed to participate in the  
7  
8 survey and submitted questionnaires online.A response rate of 65.11% was  
9  
10 achieved.After excluding 788 individuals with missing or incomplete  
11  
12 questionnaires,92815 participants were included in the final analyses.  
13  
14  
15

16  
17  
18 Electronic folders were distributed to the Nursing Quality Control  
19  
20 Center(NQCC) of each city through NQCC of Hebei Province.The folder  
21  
22 contained three documents:the link of electronic questionnaire(SO JUMP),  
23  
24 a document on blood pressure measurement precautions,and a investigation  
25  
26 notice.Upon receiving the folder,the contact person of each NQCC sent it to the  
27  
28 nursing department of all medical institutions in the region.The nursing  
29  
30 department would send it to the head managers of departments,who organized the  
31  
32 nurses to fill in the questionnaire online.A researcher reported the response rate to  
33  
34 the NQCC of each city every day.The  
35  
36 questionnaire content mainly involves:(1)demographic characteristic: hospital  
37  
38 name, hospital grade, department, name, age, gender, height, weight,  
39  
40 etc.(2)systolic blood pressure, diastolic blood pressure.(3)The risk factors  
41  
42 associated with hypertension: monthly night shift frequency, years of  
43  
44 hyperlipidemia, years of diabetes, years of hypertension,educational status,  
45  
46 marital status,menstruation condition, reproductive history, history of abortion,  
47  
48  
49  
50  
51  
52  
53  
54  
55  
56  
57  
58  
59  
60

1  
2  
3  
4 whether received hormone replacement therapy, smoking habit, alcohol  
5  
6 drinking, physical exercise, family history of hypertension, etc<sup>[14-17]</sup>.  
7  
8

### 9 10 **Ethical considerations**

11  
12  
13 The study was reviewed and approved by the Research Ethics Committee of the  
14  
15 Second Hospital of Hebei Medical University (No. 2016225). Consent was  
16  
17 implied by completion of the questionnaire. All participants were voluntary and  
18  
19 had every right to participate or refuse without any reason. To protect the privacy  
20  
21 of respondents, electronic data were saved in secured computer of the hospital  
22  
23 with restricted access.  
24  
25  
26  
27

### 28 29 30 ***Participants and public involvement***

31  
32  
33 In this study, self-report was adopted, and all the participants were nurses who  
34  
35 understand the effect of blood pressure measurement on themselves. After  
36  
37 receiving the notification of the blood pressure survey, all participants filled in  
38  
39 and submitted relevant data online, and those who did not agree could refuse to  
40  
41 participate. Although the study participants or the public were not formally  
42  
43 involved in the design and conduct of the study, the questionnaire used for data  
44  
45 collection and the specific assessments conducted were developed based on  
46  
47 previous experiences in other surveys and expert opinions. The findings will be  
48  
49 disseminated to Municipal Nursing Quality and Control Center in Hebei  
50  
51  
52  
53  
54  
55  
56  
57  
58  
59  
60

Province, but not to participating nurses directly.

### *Measurement*

Blood pressure measurement and data reporting: the nursing staff measured blood pressure by themselves and reported data through the network. Although nurses master the blood pressure measurement method generally, the researchers standardized the method of blood pressure measurement and gave the relevant attention in order to reduce measurement bias as much as possible.

Blood pressure measurements: Chose a regular calibration of the mercury sphygmomanometer or validated electronic sphygmomanometer. Used the standard specification cuff with air bag length of 22cm and width of 12cm. The obese individuals or individuals with large arm circumference used a large size balloon cuff, and the upper arm was wrapped up at least 80% by air bag. Each participant was asked to take a rest at least for 5 minutes, any vigorous activity was avoided and cigarettes, beverage containing caffeine like tea and coffee were forbidden within 30 minutes, and empty the bladder before the blood pressure measurement. Blood pressure was measured on a sitting position, the right upper arm was measured without the cloth and with the cuff at the same level as heart. Each participant was measured three times with 1 min interval and the average of the last two readings was used for analysis.

## ***Definitions***

Hypertension was defined as systolic BP (SBP)  $\geq 140$  mm Hg, or diastolic BP (DBP)  $\geq 90$  mm Hg, and/or self-reported treatment of hypertension (medical records checked) with antihypertensive medication within 2 weeks prior to the interview in accordance with the 2010 Chinese guideline. The new classification designates SBP  $\geq 130$  mm Hg or DBP  $\geq 80$  mm Hg as hypertension according to the 2017 ACC/AHA guideline.

The ratio of hypertension to total population was the prevalence of hypertension. Awareness of hypertension was defined as any self-reported previous diagnosis of hypertension by a health care professional physician, treatment as self-reported use of a prescription medication for hypertension management within the 2 weeks at the time of the interview, control as pharmacologic treatment of hypertension associated with SBP  $< 140$  mm Hg and DBP  $< 90$  mm Hg during previous 2 weeks.

In addition, the study also estimated the prevalence (SBP  $\geq 130$  or DBP  $\geq 80$  mm Hg) and control rate (SBP  $< 130$  and DBP  $< 80$  mm Hg) of hypertension according to the 2017 ACC / AHA guideline.

Response rate was defined as the number of nurses responding to the questionnaire online divided by the total number of registered nurses in

1  
2  
3  
4 Hebei Province.  
5

### 6 7 ***Statistical analysis*** 8

9  
10 Analyses were performed by using SPSS V.21.0  
11  
12 software. Continuous data were presented as mean±standard deviation, and  
13  
14 categorical data were presented by the percentages description. Chi-square  
15  
16 test was applied to compare the prevalence of hypertension among different  
17  
18 groups. A two-sided P value < 0.05 was considered statistically significant.  
19  
20  
21  
22

23  
24 The study estimated the prevalence of hypertension among all  
25  
26 participants, as well as awareness, treatment, and control rate of hypertension  
27  
28 among hypertensive participants.  
29  
30  
31

### 32 33 ***Results*** 34

#### 35 36 **Demographic characteristics** 37

38  
39  
40 Totally, 93603 participants from 512 medical institutions in 13 cities were  
41  
42 enrolled in this study, accounting for 65.11% of the total number of registered  
43  
44 nurses in Hebei province. The main reason for non-response might be some  
45  
46 invited nurses having retired but not logged out of the registration system,  
47  
48 being on leave including maternity leave, study leave and other reasons during  
49  
50 the period of data collection or refusing to participate. After excluding 788  
51  
52 individuals with missing or incomplete questionnaires (n=788), 92815  
53  
54  
55  
56  
57  
58  
59  
60

participants were included in the final analyses, among which 3,677 men (3.96%) and 8,9138 women (96.04%). The mean age of participants was 31.65(SD=7.47) years (age range: 18–65 years). (Table 1).

**Table 1 Characteristics of study participants (N=92815)**

| Variable                 | N     | Percentage(%) | SBP( $\bar{x} \pm s$ ) | DBP( $\bar{x} \pm s$ ) |
|--------------------------|-------|---------------|------------------------|------------------------|
| Overall                  | 92815 | 100           | 111.95±12.69           | 71.32± 9.53            |
| Gender                   |       |               |                        |                        |
| Female                   | 89138 | 96.04         | 111.43±12.48           | 70.98± 9.40            |
| Male                     | 3677  | 3.96          | 124.57±11.09           | 79.42± 8.71            |
| Age,y*                   |       |               |                        |                        |
| 18-25                    | 17289 | 18.63         | 110.22±10.59           | 70.49± 8.56            |
| 26-35                    | 53799 | 57.96         | 110.81±11.85           | 70.34± 9.03            |
| 36-45                    | 14989 | 16.15         | 114.10±14.39           | 72.97±10.37            |
| 46-55                    | 6376  | 6.87          | 120.55±15.61           | 77.55±10.89            |
| 56-65                    | 250   | 0.27          | 126.69±14.13           | 80.67± 9.73            |
| Missing data             | 112   | 0.12          | –                      | –                      |
| BMI,kg/m <sup>2</sup> *a |       |               |                        |                        |
| Underweight              | 7037  | 7.58          | 105.46±11.22           | 67.36± 8.55            |
| Normal                   | 57077 | 61.50         | 110.10±11.72           | 70.12± 8.99            |
| Overweight               | 22235 | 23.96         | 116.47±12.83           | 74.14± 9.67            |

|                          |       |       |              |             |
|--------------------------|-------|-------|--------------|-------------|
| Obese                    | 6253  | 6.74  | 120.04±13.65 | 76.68±10.17 |
| Missing data             | 213   | 0.23  | –            | –           |
| Years of hyperlipidemia* |       |       |              |             |
| 0                        | 86900 | 93.63 | 111.26±12.12 | 70.85± 9.18 |
| ~5                       | 4837  | 5.21  | 121.58±15.79 | 77.82±11.56 |
| ~10                      | 636   | 0.69  | 125.96±17.17 | 80.94±12.14 |
| >10                      | 127   | 0.14  | 129.86±20.10 | 83.02±13.51 |
| Missing data             | 315   | 0.34  | –            | –           |
| Years of diabetes*       |       |       |              |             |
| 0                        | 91886 | 99.00 | 111.83±12.57 | 71.24± 9.46 |
| ~5                       | 625   | 0.67  | 124.69±17.93 | 79.75±12.72 |
| ~10                      | 164   | 0.18  | 123.59±16.43 | 79.13±12.22 |
| >10                      | 56    | 0.06  | 129.73±18.05 | 81.80±13.04 |
| Missing data             | 84    | 0.09  | –            | –           |
| Smoking                  |       |       |              |             |
| Never                    | 91020 | 98.07 | 111.95±12.70 | 71.30± 9.54 |
| <10 cigarettes/day       | 1280  | 1.38  | 112.15±12.06 | 72.05± 9.07 |
| 10-20 cigarettes/day     | 419   | 0.45  | 112.27±13.38 | 72.34± 8.99 |
| >20 cigarettes/day       | 96    | 0.10  | 111.93±10.84 | 72.25± 8.46 |
| Alcohol drinking         |       |       |              |             |
| Never                    | 45984 | 49.54 | 111.92±12.65 | 71.29± 9.50 |
| Occasionally             | 46263 | 49.84 | 111.97±12.73 | 71.34± 9.56 |



|                                |       |       |              |             |
|--------------------------------|-------|-------|--------------|-------------|
| Often                          | 568   | 0.61  | 112.23±12.68 | 72.07± 8.91 |
| Family history of hypertension |       |       |              |             |
| Yes                            | 44451 | 47.89 | 111.93±12.66 | 71.29± 9.50 |
| No                             | 48364 | 52.11 | 111.97±12.71 | 71.34± 9.57 |

note: \* with the missing data

<sup>a</sup> BMI was used to classify participants into categories of underweight (<18.5), normal weight (18.5 to <24), overweight (24 to <28) and obese (≥28).

## 2.2 Prevalence, awareness, treatment and control rate of hypertension in Chinese nurses according to the two edition of the guidelines

According to the 2017 ACC/AHA guideline, the prevalence of hypertension increased from 6.81% to 28.96%, and the prevalence rate was 3.25 times higher than that defined in the 2010 Chinese guideline. The prevalence of hypertension in female and male nurses increased by 3.36 and 2.35 times, respectively. The awareness rate of hypertension was 3.25 times lower than that according to the 2010 Chinese guideline, and the awareness rate of hypertension in female and male nurses decreased by 3.37 and 2.34 times, respectively. The rate of drug treatment decreased by 3.22 times. The drug treatment rate of female and male nurses decreased by 3.34 and 2.35 times, respectively. The control rate of hypertension was 17.48 times less than that according to the 2010 Chinese guideline. And the control rate of female and male nurses decreased by 17.51 and

24.24 times, respectively. (Table 2).

**Table 2 Prevalence, awareness, treatment and control rate of hypertension**

| Participants | Diagnostic criteria for hypertension | Prevalence(95%CI)  | Awareness(95%CI)   | Treatment(95%CI)   | Control(95%CI)     |
|--------------|--------------------------------------|--------------------|--------------------|--------------------|--------------------|
| Overall      | $\geq 140/90^a$                      | 6.81(6.65- 6.97)   | 57.37(57.05-57.69) | 45.30(44.98-45.62) | 14.97(14.74-15.20) |
| (N=92815)    | $\geq 130/80^b$                      | 28.96(28.67-29.25) | 13.50(13.28-13.72) | 10.73(10.53-10.93) | 0.81( 0.75- 0.87)  |
| Female       | $\geq 140/90^a$                      | 6.28(6.12- 6.44)   | 58.52(58.20-58.84) | 46.74(46.41-47.07) | 16.10(15.86-16.34) |
| (N=89138)    | $\geq 130/80^b$                      | 27.41(27.12-27.70) | 13.40(13.18-13.62) | 10.77(10.57-10.97) | 0.87( 0.81- 0.93)  |
| Male         | $\geq 140/90^a$                      | 19.83(18.54-21.12) | 48.56(46.94-50.18) | 34.29(32.76-35.82) | 6.31( 5.52- 7.10)  |
| (N=3677)     | $\geq 130/80^b$                      | 66.41(64.88-67.94) | 14.50(13.36-15.64) | 10.28(09.30-11.26) | 0.25( 0.09- 0.41)  |

a According to the diagnostic criteria for hypertension in the 2010 Chinese guideline

b According to the diagnostic criteria for hypertension in the 2017 edition of the guideline

### 2.3 Multi-dimensional Comparative Analysis of hypertension prevalence among nursing staff

According to the 2017 ACC/AHA guideline, the number of people with high blood pressure in nursing staff rose from 6,324 to 26,875, with a total increase of 20551. (Table 3).The prevalence rate of hypertension has increased by 3.25 times, from 6.81% to 28.96%.The prevalence of hypertension in female and male nurses increased by 3.36 and 2.35 times, respectively.

The prevalence of hypertension stratified by age (18-25, 26-35, 36-45, 46-55,

1  
2  
3  
4 and over 55 years) increased by 8.61, 4.97, 1.96, 1.04, and 1.03  
5  
6 times, respectively.  
7  
8  
9

10 The prevalence of hypertension stratified by BMI (underweight, normal  
11 weight, overweight and obese) increased by 5.73, 4.42, 2.54 and 1.93  
12  
13 times, respectively.  
14  
15  
16  
17

18 According to the 2017 ACC/AHA guideline, the prevalence of hypertension  
19 among nurses without hyperlipidemia were 4.25 times higher than that according  
20  
21 to the 2010 Chinese guideline, one time higher among nurses with hyperlipidemia  
22  
23 for less than or equal to 5 years, and the increases in prevalence were 51% among  
24  
25 nurses with hyperlipidemia for more than 5 years but less than or equal to 10  
26  
27 years, 43% among nurses with hyperlipidemia for more than 10 years.  
28  
29  
30  
31  
32  
33  
34

35 According to the 2017 ACC/AHA guideline, the prevalence of hypertension  
36 among nurses without diabetes were 3.42 times higher than that according to the  
37  
38 2010 Chinese guideline, the increases in prevalence were 58% among nurses with  
39  
40 diabetes for less than or equal to 5 years, 46% among nurses with diabetes for  
41  
42 more than 5 years but less than or equal to 10 years and 44% among nurses with  
43  
44 diabetes for more than 10 years.  
45  
46  
47  
48  
49  
50

51 According to the 2017 ACC/AHA guideline, the prevalence of hypertension  
52 among nurses without history of smoking were 3.24 times higher than that  
53  
54  
55  
56  
57  
58  
59  
60

1  
2  
3  
4 according to the 2010 Chinese guideline, 3.77 times higher among nurses who  
5  
6 smoke cigarettes less than 10 a day, 3.34 times higher among nurses who smoke  
7  
8 cigarettes 10-20 a day, and 5.20 times higher among nurses who smoke cigarettes  
9  
10 more than 20 a day.  
11  
12  
13

14  
15 According to the 2017 ACC/AHA guideline, the prevalence of hypertension  
16  
17 among nurses without the history of drinking, light drinker nurses and heavy  
18  
19 drinker nurses were 3.29, 3.22 and 3.14 times higher than those according to the  
20  
21 2010 Chinese guideline, respectively.  
22  
23  
24

25  
26 According to the 2017 ACC/AHA guideline, the prevalence of hypertension  
27  
28 among nurses with family history of hypertension and without family history of  
29  
30 hypertension were 3.30 and 3.21 times higher than those defined by the 2010  
31  
32 Chinese guideline, respectively.  
33  
34  
35

36  
37 We assessed associations between variables and newly diagnosed hypertension  
38  
39 according to the 2017 ACC/AHA guideline using  $\chi^2$  tests and determined that  
40  
41 gender, age, BMI, years of hyperlipidemia and years of diabetes were significantly  
42  
43 associated with newly diagnosed hypertension. (table 4)  
44  
45  
46

47  
48 In table 5, the variables related to newly diagnosed hypertension, determined  
49  
50 using a multiple logistic model, an OR and a 95% CI, are shown. Female are  
51  
52 more likely to be newly diagnosed with hypertension than male according to the  
53  
54  
55  
56  
57  
58  
59  
60

2017 ACC/AHA guideline. Participants with no hyperlipidemia, no diabetes, lower age and lower BMI value are more likely to be newly diagnosed with hypertension.

**Table 3 Comparison of hypertension prevalence among nursing staff**

| Variable              | N     | ≥140/90 <sup>a</sup> |                    | ≥130/80 <sup>b</sup> |                    | $\chi^2$<br>Value | P<br>Value |
|-----------------------|-------|----------------------|--------------------|----------------------|--------------------|-------------------|------------|
|                       |       | Hypertension         | Prevalence         | Hypertension         | Prevalence         |                   |            |
| Gender                |       |                      |                    |                      |                    |                   |            |
| Female                | 89138 | 5595                 | 6.28( 6.12- 6.44)  | 24433                | 27.41(27.12-27.70) | 14211.74          | <0.001     |
| Male                  | 3677  | 729                  | 19.83(18.54-21.12) | 2442                 | 66.41(64.88-67.94) | 1626.88           | <0.001     |
| Age,y                 |       |                      |                    |                      |                    |                   |            |
| 18-25                 | 17289 | 448                  | 2.59( 2.35- 2.83)  | 4303                 | 24.89(24.25-25.53) | 3626.22           | <0.001     |
| 26-35                 | 53799 | 2263                 | 4.21( 4.04- 4.38)  | 13532                | 25.15(24.78-25.52) | 9423.20           | <0.001     |
| 36-45                 | 14989 | 1784                 | 11.90(11.38-12.42) | 5284                 | 35.25(34.49-36.01) | 2267.87           | <0.001     |
| 46-55                 | 6376  | 1726                 | 27.07(25.98-28.16) | 3524                 | 55.27(54.05-56.49) | 1046.70           | <0.001     |
| 56-65                 | 250   | 91                   | 36.40(30.44-42.36) | 185                  | 74.00(68.56-79.44) | 71.46             | <0.001     |
| BMI,kg/m <sup>2</sup> |       |                      |                    |                      |                    |                   |            |
| Underweight           | 7037  | 153                  | 2.17( 1.83- 2.51)  | 1028                 | 14.61(13.78-15.44) | 707.67            | <0.001     |
| Normal                | 57077 | 2501                 | 4.38( 4.21- 4.55)  | 13552                | 23.74(23.39-24.09) | 8852.47           | <0.001     |
| Overweight            | 22235 | 2527                 | 11.36(10.94-11.78) | 8941                 | 40.21(39.57-40.85) | 4833.89           | <0.001     |
| Obese                 | 6253  | 1120                 | 17.91(16.96-18.86) | 3280                 | 52.45(51.21-53.69) | 1635.94           | <0.001     |
| Years of              |       |                      |                    |                      |                    |                   |            |

## hyperlipidemia

|     |       |      |                    |       |                    |          |        |
|-----|-------|------|--------------------|-------|--------------------|----------|--------|
| 0   | 86900 | 4473 | 5.15( 5.00- 5.30)  | 23495 | 27.04(26.74-27.34) | 15418.70 | <0.001 |
| ~5  | 4837  | 1431 | 34.74(33.29-36.19) | 2712  | 65.84(64.39-67.29) | 692.76   | <0.001 |
| ~10 | 636   | 292  | 25.82(23.27-28.37) | 417   | 36.87(34.06-39.68) | 49.79    | <0.001 |
| >10 | 127   | 61   | 17.43(13.46-21.40) | 95    | 27.14(22.48-31.80) | 19.21    | <0.001 |

Years of  
diabetes

|     |       |      |                    |       |                    |          |        |
|-----|-------|------|--------------------|-------|--------------------|----------|--------|
| 0   | 91886 | 5951 | 6.48( 6.32- 6.64)  | 26285 | 28.61(28.32-28.90) | 15554.93 | <0.001 |
| ~5  | 625   | 270  | 49.27(45.08-53.46) | 413   | 75.36(71.75-78.97) | 66.01    | <0.001 |
| ~10 | 164   | 64   | 33.51(26.82-40.20) | 99    | 51.83(44.74-58.92) | 14.94    | <0.001 |
| >10 | 56    | 30   | 28.30(19.72-36.88) | 45    | 42.45(33.04-51.86) | 9.08     | 0.003  |

## Smoking

|                         |       |      |                   |       |                    |          |        |
|-------------------------|-------|------|-------------------|-------|--------------------|----------|--------|
| Never                   | 91020 | 6200 | 6.81( 6.65- 6.97) | 26290 | 28.88(28.59-29.17) | 15121.35 | <0.001 |
| <10<br>cigarettes/day   | 1280  | 87   | 6.80( 5.42- 8.18) | 415   | 32.42(29.86-34.98) | 266.59   | <0.001 |
| 10-20<br>cigarettes/day | 419   | 32   | 7.64( 5.10-10.18) | 139   | 33.17(28.66-37.68) | 84.12    | <0.001 |
| >20<br>cigarettes/day   | 96    | 5    | 5.21( 0.76- 9.66) | 31    | 32.29(22.94-41.64) | 23.11    | <0.001 |

Alcohol  
drinking

|              |       |      |                   |       |                    |         |        |
|--------------|-------|------|-------------------|-------|--------------------|---------|--------|
| Never        | 45984 | 3085 | 6.71( 6.48- 6.94) | 13226 | 28.76(28.35-29.17) | 7664.23 | <0.001 |
| Occasionally | 46263 | 3194 | 6.90( 6.67- 7.13) | 13463 | 29.10(28.69-29.51) | 7720.74 | <0.001 |

|                                |       |      |                   |       |                    |         |        |
|--------------------------------|-------|------|-------------------|-------|--------------------|---------|--------|
| Often                          | 568   | 45   | 7.92( 5.70-10.14) | 186   | 32.75(28.89-36.61) | 108.03  | <0.001 |
| Family history of hypertension |       |      |                   |       |                    |         |        |
| Yes                            | 44451 | 2967 | 6.67( 6.44- 6.90) | 12743 | 28.67(28.25-29.09) | 7389.14 | <0.001 |
| No                             | 48364 | 3357 | 6.94( 6.71- 7.17) | 14132 | 29.22(28.81-29.63) | 8103.69 | <0.001 |

a According to the diagnostic criteria for hypertension in 2010 Chinese guideline

b According to the diagnostic criteria for hypertension in the 2017 edition of the guideline

c BMI was classified into underweight (<18.5),normal weight (18.5 to <24), overweight (24 to <28) and obese (≥28).

**Table 4 Univariate analysis of factors associated with newly diagnosed hypertension**

| Variable              | Hypertension according to the 2010 Chinese guideline (n=6324) | Newly diagnosed with hypertension according to the 2017 ACC/AHA guideline (n=20551) | $\chi^2$ Value | P Value |
|-----------------------|---------------------------------------------------------------|-------------------------------------------------------------------------------------|----------------|---------|
| Gender                |                                                               |                                                                                     | 59.65          | <0.001* |
| Female                | 5595                                                          | 18838                                                                               |                |         |
| Male                  | 729                                                           | 1713                                                                                |                |         |
| Age,y                 |                                                               |                                                                                     | 2403.69        | <0.001* |
| 18-25                 | 448                                                           | 3855                                                                                |                |         |
| 26-35                 | 2263                                                          | 11269                                                                               |                |         |
| 36-45                 | 1784                                                          | 3500                                                                                |                |         |
| 46-55                 | 1726                                                          | 1798                                                                                |                |         |
| 56-65                 | 91                                                            | 94                                                                                  |                |         |
| BMI,kg/m <sup>2</sup> |                                                               |                                                                                     | 553.79         | <0.001* |

|    |                      |      |       |         |         |
|----|----------------------|------|-------|---------|---------|
| 1  |                      |      |       |         |         |
| 2  |                      |      |       |         |         |
| 3  | Underweight          | 153  | 875   |         |         |
| 4  |                      |      |       |         |         |
| 5  | Normal               | 2501 | 11051 |         |         |
| 6  |                      |      |       |         |         |
| 7  | Overweight           | 2527 | 6414  |         |         |
| 8  |                      |      |       |         |         |
| 9  | Obese                | 1120 | 2160  |         |         |
| 10 |                      |      |       |         |         |
| 11 | Years of             |      |       |         |         |
| 12 | hyperlipidemia       |      |       | 2146.97 | <0.001* |
| 13 |                      |      |       |         |         |
| 14 | 0                    | 4473 | 19022 |         |         |
| 15 |                      |      |       |         |         |
| 16 | ~5                   | 1431 | 1281  |         |         |
| 17 |                      |      |       |         |         |
| 18 | ~10                  | 292  | 125   |         |         |
| 19 |                      |      |       |         |         |
| 20 | >10                  | 61   | 34    |         |         |
| 21 |                      |      |       |         |         |
| 22 | Years of diabetes    |      |       | 553.08  | <0.001* |
| 23 |                      |      |       |         |         |
| 24 | 0                    | 5951 | 20334 |         |         |
| 25 |                      |      |       |         |         |
| 26 | ~5                   | 270  | 143   |         |         |
| 27 |                      |      |       |         |         |
| 28 | ~10                  | 64   | 35    |         |         |
| 29 |                      |      |       |         |         |
| 30 | >10                  | 30   | 15    |         |         |
| 31 |                      |      |       |         |         |
| 32 | Smoking              |      |       | 2.52    | 0.471   |
| 33 |                      |      |       |         |         |
| 34 | Never                | 6200 | 20090 |         |         |
| 35 |                      |      |       |         |         |
| 36 | <10 cigarettes/day   | 87   | 328   |         |         |
| 37 |                      |      |       |         |         |
| 38 | 10-20 cigarettes/day | 32   | 107   |         |         |
| 39 |                      |      |       |         |         |
| 40 | >20 cigarettes/day   | 5    | 26    |         |         |
| 41 |                      |      |       |         |         |
| 42 | Alcohol drinking     |      |       | 0.64    | 0.728   |
| 43 |                      |      |       |         |         |
| 44 | Never                | 3085 | 10141 |         |         |
| 45 |                      |      |       |         |         |
| 46 |                      |      |       |         |         |
| 47 |                      |      |       |         |         |
| 48 |                      |      |       |         |         |
| 49 |                      |      |       |         |         |
| 50 |                      |      |       |         |         |
| 51 |                      |      |       |         |         |
| 52 |                      |      |       |         |         |
| 53 |                      |      |       |         |         |
| 54 |                      |      |       |         |         |
| 55 |                      |      |       |         |         |
| 56 |                      |      |       |         |         |
| 57 |                      |      |       |         |         |
| 58 |                      |      |       |         |         |
| 59 |                      |      |       |         |         |
| 60 |                      |      |       |         |         |



|                                |      |       |      |       |
|--------------------------------|------|-------|------|-------|
| Occasionally                   | 3194 | 10269 |      |       |
| Often                          | 45   | 141   |      |       |
| Family history of hypertension |      |       | 0.83 | 0.363 |
| Yes                            | 2967 | 9776  |      |       |
| No                             | 3357 | 10775 |      |       |

\*P<0.10 was considered statistically significant.

**Table 5 Multiple logistic regression of factors associated with newly diagnosed hypertension**

| Variables               | OR    | 95% CI         | P      |
|-------------------------|-------|----------------|--------|
| Gender                  | 0.647 | 0.585 to 0.716 | <0.001 |
| Age,y                   | 0.538 | 0.520 to 0.557 | <0.001 |
| BMI,kg/m <sup>2</sup>   | 0.760 | 0.729 to 0.791 | <0.001 |
| Years of hyperlipidemia | 0.426 | 0.397 to 0.458 | <0.001 |
| Years of diabetes       | 0.597 | 0.517 to 0.690 | <0.001 |

## Discussion

According to the 2010 Chinese guideline , the prevalence rate of hypertension was 6.81% in this study.Li *et al*<sup>[18]</sup> investigated 4032 cardiovascular physicians from 386 hospitals in China. The results showed that the prevalence of hypertension among cardiovascular physicians was 13.1%. Liu *et al*<sup>[19]</sup> analyzed

1  
2  
3  
4 the prevalence of hypertension among 1369 medical staff in a tertiary academic  
5  
6 hospital in Zhengzhou, and the prevalence of hypertension was 18.33%. The  
7  
8 prevalence of hypertension in this survey was lower than the above level, which  
9  
10 may be related to the lower age and the greater proportion of women of nursing  
11  
12 staff. According to the 2017 ACC/AHA guideline, the hypertension prevalence  
13  
14 rate of nursing personnel in the survey increased to 28.96%, which increased 4.15  
15  
16 times among nurses under the 45 years old and 1.04 times among nurses of 45  
17  
18 years of age or older. The prevalence rate of the population with no  
19  
20 hyperlipidemia, no diabetes, lower age and BMI value will increase, suggesting  
21  
22 that more low-risk population will be diagnosed with hypertension.  
23  
24  
25  
26  
27  
28  
29

30  
31 The report of China Health and Family Planning Commission indicated that the  
32  
33 awareness rate of hypertension among people over 18 years old in China was  
34  
35 46.5%, the drug treatment rate was 41.1%, and the control rate was 13.8% in  
36  
37 2012<sup>[20]</sup>. In addition, a survey<sup>[21]</sup> of 174,621 people aged 18 years or older in 31  
38  
39 provinces in China from 2013 to 2014 showed that the awareness, treatment and  
40  
41 control rate were 31.9%, 26.4% and 9.7%, respectively. Lixin Jiang *et al*<sup>[22]</sup> made  
42  
43 use of data generated in the China Patient-Centered Evaluative Assessment of  
44  
45 Cardiac Events (PEACE) Million Persons Project from 2014 to 2017, a  
46  
47 population-based screening project that enrolled around 1.7 million adults aged  
48  
49 35-75 years from all 31 provinces in mainland China. The age-standardised and  
50  
51  
52  
53  
54  
55  
56  
57  
58  
59  
60

1  
2  
3  
4 sex-standardised rates of hypertension prevalence, awareness, treatment, and  
5  
6 control were 37.2%, 36.0% , 22.9% and 5.7% , respectively. In this survey, the  
7  
8 awareness rate of hypertension in nursing staff was 57.37%, the rate of treatment  
9  
10 was 45.30%, and the control rate was 14.7%, all higher than the above results.  
11  
12 However, the control rate of hypertension among female nurses was 16.10%,  
13  
14 and among male nursing staff was only 6.31%. The awareness rate and treatment  
15  
16 rate of nursing staff were slightly higher than those of the above research results.  
17  
18 As a medical worker, the awareness rate of hypertension and the rate of drug  
19  
20 treatment should have been higher. The survey showed that there is still much  
21  
22 room for improvement in the awareness rate of hypertension. According to the  
23  
24 2017 ACC/AHA guideline, the awareness rate, drug treatment rate and control  
25  
26 rate of hypertension among Chinese nurses will be significantly reduced, and the  
27  
28 number of people with normal blood pressure level will be greatly reduced.  
29  
30  
31  
32  
33  
34  
35  
36  
37

38 It has been reported that treatment of hypertension can reduce the risk of stroke  
39  
40 and myocardial infarction by 30-43% and 15%, respectively, along with reducing  
41  
42 the risk of a number of other chronic conditions<sup>[23-25]</sup>.The entire population  
43  
44 including nursing staff should pay more attention to the management of blood  
45  
46 pressure.Improving the lifestyle and monitoring the blood pressure regularly are  
47  
48 suggested to control the blood pressure in a reasonable range. In order to prevent  
49  
50 and control the occurrence of hypertension and related diseases, drug treatment  
51  
52  
53  
54  
55  
56  
57  
58  
59  
60

1  
2  
3  
4 should be carried out and therapeutic regimen should be adjusted in time if  
5  
6  
7 nessesary.

### 8 9 10 ***Limitation***

11  
12  
13 At present, there are few studies on the current status of hypertension among  
14  
15  
16 nurses. This study is a cross-sectional survey based on a large sample of nursing  
17  
18  
19 staff. The large sample and high response rate make the data and results of this  
20  
21  
22 study better representative. However, some limitations should be considered when  
23  
24  
25 interpreting our data. First of all, this survey used the average blood pressure  
26  
27  
28 measured 3 times on the same day, that may have false positive diagnosis,  
29  
30  
31 resulting in overestimation of the prevalence rate. Secondly, the blood pressure  
32  
33  
34 was measured by nurses themselves rather than the staff trained unifiedly, but all  
35  
36  
37 nurses had received professional knowledge of blood pressure measurement. In  
38  
39  
40 addition, a unified description of the measurement methods and matters of  
41  
42  
43 attention were carried out in the study, which could ensure the reliability of the  
44  
45  
46 measurement results. Furthermore, because of the difference of blood pressure  
47  
48  
49 measuring instruments, it may have some effect on the data, but the  
50  
51  
52 sphygmomanometer had been tested and corrected. The blood pressure  
53  
54  
55 measurement in the survey was carried out according to international  
56  
57  
58 measurement and quality control regulations, which could guarantee the  
59  
60  
61 reliability of the measurement results. Finally, the generalizability of our results

1  
2  
3  
4 may be restricted due to the participants being recruited from only one province  
5  
6 in China. Future studies should be carried out to recruit participants from other  
7  
8 cities in China .  
9

### 10 11 12 ***Acknowledgment*** 13

14  
15  
16 This project was supported by the Hebei provincial Science and Technology  
17  
18 Department (162777166).  
19

20  
21  
22 ***Contributors:*** WC conceived the study, WC, BZ, YMH and YJZ designed the  
23  
24 study, drafted the manuscript, or critically revised the manuscript  
25  
26  
27 for important intellectual content. J Li, FDL, XMC, XLY, AFZ, RFJ, RQZ, ALF,  
28  
29 YW, MJY, LT, SLC, JC and MZZ conducted the research and collected data, J  
30  
31 Liu, DF and MHX analyzed the data, WC, BZ, J Liu, YMH and DF wrote the this  
32  
33 article. All authors gave final approval of the version to be published and are  
34  
35 accountable for all aspects of the work in ensuring that questions related to the  
36  
37 accuracy or integrity of any part of the work are appropriately investigated and  
38  
39 resolved. WC is the corresponding author and guarantor.  
40  
41  
42  
43  
44  
45

46  
47 ***Competing interests:*** All authors have completed the ICMJE uniform disclosure  
48  
49 form at [www.icmje.org/coi\\_disclosure.pdf](http://www.icmje.org/coi_disclosure.pdf) (available on request from the  
50  
51 corresponding author). No financial relationships with any organisations that  
52  
53 might have an interest in the submitted work in the previous three years; no other  
54  
55  
56  
57  
58  
59  
60

1  
2  
3  
4 relationships or activities that could appear to have influenced the submitted  
5  
6 work.  
7

8  
9  
10 ***Ethical approval:***The protocol was reviewed and approved by the Research  
11  
12 Ethics Committee of the Second Hospital of Hebei Medical University(No  
13  
14 2016225).  
15  
16

17  
18 ***Transparency statement:*** The guarantor (BZ) affirms that the manuscript is an  
19  
20 honest, accurate, and transparent account of the study being reported; that no  
21  
22 important aspects of the study have been omitted; and that any discrepancies from  
23  
24 the study as planned (and, if relevant, registered) have been explained.  
25  
26  
27

28  
29  
30 ***Data sharing:***No additional data available.  
31  
32

33  
34 ***Funding:***This project was supported by the Hebei provincial Science and  
35  
36 Technology Department (162777166).  
37  
38

39  
40 ***Exclusive licence:***The Corresponding Author has the right to grant on behalf of  
41  
42 all authors and does grant on behalf of all authors, a worldwide licence to the  
43  
44 Publishers and its licensees in perpetuity, in all forms, formats and media  
45  
46 (whether known now or created in the future), to i) publish, reproduce, distribute,  
47  
48 display and store the Contribution, ii) translate the Contribution into other  
49  
50 languages, create adaptations, reprints, include within collections and create  
51  
52 summaries, extracts and/or, abstracts of the Contribution, iii) create any other  
53  
54  
55  
56  
57  
58  
59  
60

1  
2  
3  
4 derivative work(s) based on the Contribution, iv) to exploit all subsidiary rights in  
5  
6 the Contribution, v) the inclusion of electronic links from the Contribution to  
7  
8 third party material where-ever it may be located; and, vi) licence any third party  
9  
10 to do any or all of the above.  
11  
12  
13  
14  
15  
16  
17  
18  
19  
20  
21  
22  
23

## References

- 24 [1] Agnoletti D, Valbusa F, Labat C, Gautier S, Mourad JJ, Benetos A. Evidence for a Prognostic Role of Orthostatic  
25 Hypertension on Survival in a Very Old Institutionalized Population. *Hypertension*. 2016. 67(1): 191-196.  
26  
27 [2] Chen W, Gao R, Liu L, et al. China cardiovascular disease report 2015. *Chinese Circulation Journal*. 2016.  
28 31(06): 521-528.  
29  
30 [3] Lewington S, Lacey B, Clarke R, et al. The Burden of Hypertension and Associated Risk for Cardiovascular  
31 Mortality in China. *JAMA Intern Med*. 2016. 176(4): 524-532.  
32  
33 [4] Chen W, Gao R, Liu L, et al. China cardiovascular disease report 2017. *Chinese Circulation Journal*. 2018.  
34 33(01): 1-8.  
35  
36 [5] Qi SF, Zhang B, Wang HJ, et al. Prevalence of hypertension subtypes in 2011 and the trends from 1991 to 2011  
37 among Chinese adults. *J Epidemiol Community Health*. 2016. 70(5): 444-451.  
38  
39 [6] Liang Y, Liu R, Du S, Qiu C. Trends in incidence of hypertension in Chinese adults, 1991-2009: the China Health  
40 and Nutrition Survey. *Int J Cardiol*. 2014. 175(1): 96-101.  
41  
42 [7] Li D, Huang J, Tang L, Wang J, Jia H. Characteristics of Job Stressors, Fatigue and Change of Blood Pressure,  
43 Blood Glucose and Lipid among ICU NRISES. *Nurs J Chin PLA*. 2012. 29(07): 1-4.  
44  
45 [8] Lo SH, Lin LY, Hwang JS, Chang YY, Liau CS, Wang JD. Working the night shift causes increased vascular stress  
46 and delayed recovery in young women. *Chronobiol Int*. 2010. 27(7): 1454-1468.  
47  
48 [9] Whelton PK, Carey RM, Aronow WS, et al. 2017 ACC/AHA/AAPA/ABC/ACPM/AGS/APhA/ASH/ASPC/NMA/PCNA  
49 Guideline for the Prevention, Detection, Evaluation, and Management of High Blood Pressure in Adults: A  
50 Report of the American College of Cardiology/American Heart Association Task Force on Clinical Practice  
51 Guidelines. *J Am Coll Cardiol*. 2017 .  
52  
53  
54  
55  
56  
57  
58  
59  
60

- 1  
2  
3 [10] Kario K. Global Impact of 2017 American Heart Association/American College of Cardiology Hypertension  
4 GuidelinesA Perspective From Japan. *Circulation*. 2018. 137(6): 543-545.  
5  
6 [11] Gurpreet SW, C.Venkata S.Ram. Global Impact of 2017 American Heart Association/American College of  
7 Cardiology Hypertension Guidelines A Perspective From India. *Circulation*. 2018. 137(6): 549 – 550.  
8  
9 [12] Wang J, Liu Ls. Global Impact of 2017 American College of Cardiology/American Heart Association  
10 Hypertension Guidelines A Perspective From China. *Circulation*. 2018. 137(6): 546-548.  
11  
12 [13] Wang Z, Chen Z, Zhang L, et al. Status of Hypertension in China: Results from the China Hypertension Survey,  
13 2012-2015. *Circulation*. 2018 .  
14  
15 [14] Guo J, Zhu YC, Chen YP, Hu Y, Tang XW, Zhang B. The dynamics of hypertension prevalence, awareness,  
16 treatment, control and associated factors in Chinese adults: results from CHNS 1991-2011. *J Hypertens*. 2015.  
17 33(8): 1688-1696.  
18  
19 [15] Afridi HI, Talpur FN, Kazi TG, Brabazon D. Assessment of toxic elements in the samples of different cigarettes  
20 and their effect on the essential elemental status in the biological samples of Irish hypertensive consumers. *J*  
21 *Hum Hypertens*. 2015. 29(5): 309-315.  
22  
23 [16] Sun J, Buys NJ, Hills AP. Dietary pattern and its association with the prevalence of obesity, hypertension and  
24 other cardiovascular risk factors among Chinese older adults. *Int J Environ Res Public Health*. 2014. 11(4):  
25 3956-3971.  
26  
27 [17] Ahn S, Zhao H, Smith ML, Ory MG, Phillips CD. BMI and lifestyle changes as correlates to changes in  
28 self-reported diagnosis of hypertension among older Chinese adults. *J Am Soc Hypertens*. 2011. 5(1): 21-30.  
29  
30 [18] Li S, Yu J, Zhang L, Zhan Y, Zhang F, Hu D. Hypertension and cardiovascular risk evaluation of Chinese  
31 cardiovascular physicians. *Chin J Cardiol*. 2011. 39(3): 254-258.  
32  
33 [19] Liu M, Wang D, Hao Y, Shen M, Xie D. Risk Factors of Hypertension in Medical Staff in a Three-A Level  
34 Hospital in Zhengzhou. *Evaluation and analysis of drug-use in hospitals of China*. 2015. 15(02): 267-269.  
35  
36 [20] Commission CHaFP. Report on nutrition and chronic diseases in China (2015). 2015. Beijing. People's Medical  
37 Publishing House. 33-50.  
38  
39 [21] Li Y, Yang L, Wang L, et al. Burden of hypertension in China: A nationally representative survey of 174,621  
40 adults. *Int J Cardiol*. 2017. 227: 516-523.  
41  
42 [22] Lu J, Lu Y, Wang X, et al. Prevalence, awareness, treatment, and control of hypertension in China: data from  
43 1 • 7 million adults in a population-based screening study (China PEACE Million Persons Project). *Lancet*. 2017.  
44 390(10112): 2549-2558.  
45  
46 [23] Lemstra M, Alsabbagh MW. Proportion and risk indicators of nonadherence to antihypertensive therapy: a  
47 meta-analysis. *Patient Prefer Adherence*. 2014. 8: 211-218.  
48  
49  
50  
51  
52  
53  
54  
55  
56  
57  
58  
59



- 1  
2  
3 [24] Wang W, Lau Y, Loo A, Chow A, Thompson DR. Medication adherence and its associated factors among  
4 Chinese community-dwelling older adults with hypertension. *Heart Lung*. 2014. 43(4): 278-283.  
5  
6  
7 [25] Law MR, Morris JK, Wald NJ. Use of blood pressure lowering drugs in the prevention of cardiovascular disease:  
8 meta-analysis of 147 randomised trials in the context of expectations from prospective epidemiological  
9 studies. *BMJ*. 2009. 338: b1665.  
10  
11  
12  
13  
14  
15  
16  
17  
18  
19  
20  
21  
22  
23  
24  
25  
26  
27  
28  
29  
30  
31  
32  
33  
34  
35  
36  
37  
38  
39  
40  
41  
42  
43  
44  
45  
46  
47  
48  
49  
50  
51  
52  
53  
54  
55  
56  
57  
58  
59  
60

STROBE Statement—Checklist of items that should be included in reports of *cross-sectional studies*

|                           | Item No | Recommendation                                                                                                                                                                       |                                                          |
|---------------------------|---------|--------------------------------------------------------------------------------------------------------------------------------------------------------------------------------------|----------------------------------------------------------|
| <b>Title and abstract</b> | 1       | (a) Indicate the study's design with a commonly used term in the title or the abstract                                                                                               | the 1st segment of Page 4                                |
|                           |         | (b) Provide in the abstract an informative and balanced summary of what was done and what was found                                                                                  | Page 4 and Page 5                                        |
| <b>Introduction</b>       |         |                                                                                                                                                                                      |                                                          |
| Background/rationale      | 2       | Explain the scientific background and rationale for the investigation being reported                                                                                                 | the 2nd segment and the 3rd segment of Page 6            |
| Objectives                | 3       | State specific objectives, including any prespecified hypotheses                                                                                                                     | the 1st segment of Page 7                                |
| <b>Methods</b>            |         |                                                                                                                                                                                      |                                                          |
| Study design              | 4       | Present key elements of study design early in the paper                                                                                                                              | the 1st sentence in the last segment of Page 7           |
| Setting                   | 5       | Describe the setting, locations, and relevant dates, including periods of recruitment, exposure, follow-up, and data collection                                                      | the last segment of Page 7 and the 1st segment of Page 8 |
| Participants              | 6       | (a) Give the eligibility criteria, and the sources and methods of selection of participants                                                                                          | the last segment of Page 7                               |
| Variables                 | 7       | Clearly define all outcomes, exposures, predictors, potential confounders, and effect modifiers. Give diagnostic criteria, if applicable                                             | the four segments of Page 11                             |
| Data sources/measurement  | 8*      | For each variable of interest, give sources of data and details of methods of assessment (measurement). Describe comparability of assessment methods if there is more than one group | the two segments of Page 10                              |
| Bias                      | 9       | Describe any efforts to address potential sources of bias                                                                                                                            | the 2nd sentence in the 1st segment of Page 10           |
| Study size                | 10      | Explain how the study size was arrived at                                                                                                                                            | the last segment of Page 7                               |
| Quantitative variables    | 11      | Explain how quantitative variables were handled in the analyses. If applicable, describe which groupings were chosen and why                                                         | the first two segments of Page 12                        |
| Statistical methods       | 12      | (a) Describe all statistical methods, including those used to control for confounding                                                                                                | the first two segments of Page 12                        |
|                           |         | (b) Describe any methods used to examine subgroups and interactions                                                                                                                  | N/A                                                      |
|                           |         | (c) Explain how missing data were addressed                                                                                                                                          | the 3rd sentence of Page 8                               |
|                           |         | (d) If applicable, describe analytical methods taking account of sampling strategy                                                                                                   | N/A                                                      |
|                           |         | (e) Describe any sensitivity analyses                                                                                                                                                | N/A                                                      |
| <b>Results</b>            |         |                                                                                                                                                                                      |                                                          |
| Participants              | 13*     | (a) Report numbers of individuals at each stage of study—eg numbers potentially eligible, examined for eligibility,                                                                  | N/A                                                      |

|                          |     |                                                                                                                                                                                                              |                                                             |
|--------------------------|-----|--------------------------------------------------------------------------------------------------------------------------------------------------------------------------------------------------------------|-------------------------------------------------------------|
|                          |     | confirmed eligible, included in the study, completing follow-up, and analysed                                                                                                                                |                                                             |
|                          |     | (b) Give reasons for non-participation at each stage                                                                                                                                                         | N/A                                                         |
|                          |     | (c) Consider use of a flow diagram                                                                                                                                                                           | N/A                                                         |
| Descriptive data         | 14* | (a) Give characteristics of study participants (eg demographic, clinical, social) and information on exposures and potential confounders                                                                     | Table 1                                                     |
|                          |     | (b) Indicate number of participants with missing data for each variable of interest                                                                                                                          | Table 1                                                     |
| Outcome data             | 15* | Report numbers of outcome events or summary measures                                                                                                                                                         | Table 2 and Table 3                                         |
| Main results             | 16  | (a) Give unadjusted estimates and, if applicable, confounder-adjusted estimates and their precision (eg, 95% confidence interval). Make clear which confounders were adjusted for and why they were included | Table 2 and Table 3                                         |
|                          |     | (b) Report category boundaries when continuous variables were categorized                                                                                                                                    | Table 1 and Table 3                                         |
|                          |     | (c) If relevant, consider translating estimates of relative risk into absolute risk for a meaningful time period                                                                                             | N/A                                                         |
| Other analyses           | 17  | Report other analyses done—eg analyses of subgroups and interactions, and sensitivity analyses                                                                                                               | Table 4 and Table 5                                         |
| <b>Discussion</b>        |     |                                                                                                                                                                                                              |                                                             |
| Key results              | 18  | Summarise key results with reference to study objectives                                                                                                                                                     | the 1st sentence of Page 23 and the 2nd sentence of Page 24 |
| Limitations              | 19  | Discuss limitations of the study, taking into account sources of potential bias or imprecision. Discuss both direction and magnitude of any potential bias                                                   | Page 26                                                     |
| Interpretation           | 20  | Give a cautious overall interpretation of results considering objectives, limitations, multiplicity of analyses, results from similar studies, and other relevant evidence                                   | Page 23 and Page 24                                         |
| Generalisability         | 21  | Discuss the generalisability (external validity) of the study results                                                                                                                                        | the last sentence of Page 26                                |
| <b>Other information</b> |     |                                                                                                                                                                                                              |                                                             |
| Funding                  | 22  | Give the source of funding and the role of the funders for the present study and, if applicable, for the original study on which the present article is based                                                | the 4th segment of Page 28                                  |

\*Give information separately for exposed and unexposed groups.

**Note:** An Explanation and Elaboration article discusses each checklist item and gives methodological background and published examples of transparent reporting. The STROBE checklist is best used in conjunction with this article (freely available on the Web sites of PLoS Medicine at <http://www.plosmedicine.org/>, Annals of Internal Medicine at <http://www.annals.org/>, and Epidemiology at <http://www.epidem.com/>). Information on the STROBE Initiative is available at [www.strobe-statement.org](http://www.strobe-statement.org).

# BMJ Open

## The prevalence of hypertension in 92815 nurses and its changes according to the 2017 ACC/AHA hypertension guideline: an observational cross-sectional study from China

|                                 |                                                                                                                                                                                                                                                                                                                                                                                                                                                                                                                                                                                                                                                                                                                                                                                                                                                                                                                                                                                                                                                                                                                                                                                                                                                                                                                                                                                                       |
|---------------------------------|-------------------------------------------------------------------------------------------------------------------------------------------------------------------------------------------------------------------------------------------------------------------------------------------------------------------------------------------------------------------------------------------------------------------------------------------------------------------------------------------------------------------------------------------------------------------------------------------------------------------------------------------------------------------------------------------------------------------------------------------------------------------------------------------------------------------------------------------------------------------------------------------------------------------------------------------------------------------------------------------------------------------------------------------------------------------------------------------------------------------------------------------------------------------------------------------------------------------------------------------------------------------------------------------------------------------------------------------------------------------------------------------------------|
| Journal:                        | <i>BMJ Open</i>                                                                                                                                                                                                                                                                                                                                                                                                                                                                                                                                                                                                                                                                                                                                                                                                                                                                                                                                                                                                                                                                                                                                                                                                                                                                                                                                                                                       |
| Manuscript ID                   | bmjopen-2018-027201.R1                                                                                                                                                                                                                                                                                                                                                                                                                                                                                                                                                                                                                                                                                                                                                                                                                                                                                                                                                                                                                                                                                                                                                                                                                                                                                                                                                                                |
| Article Type:                   | Research                                                                                                                                                                                                                                                                                                                                                                                                                                                                                                                                                                                                                                                                                                                                                                                                                                                                                                                                                                                                                                                                                                                                                                                                                                                                                                                                                                                              |
| Date Submitted by the Author:   | 09-Apr-2019                                                                                                                                                                                                                                                                                                                                                                                                                                                                                                                                                                                                                                                                                                                                                                                                                                                                                                                                                                                                                                                                                                                                                                                                                                                                                                                                                                                           |
| Complete List of Authors:       | <p>zhao, bin; Second Hospital of Hebei Medical University<br/> li, jing; Second Hospital of Hebei Medical University<br/> liu, jie; Second Hospital of Hebei Medical University<br/> hao, yuming; Second Hospital of Hebei Medical University<br/> zhen, yanjie; Second Hospital of Hebei Medical University<br/> feng, di; Second Hospital of Hebei Medical University<br/> xu, menghui; Second Hospital of Hebei Medical University<br/> chen, ximin; Second hospital of Baoding<br/> yang, xiulan; Tangshan Gongren Hospital, nursing department<br/> zuo, aifang; Handan central hospital , nursing department<br/> jia, rufu; Cangzhou central hospital, neurology hospital<br/> zhang, ruiqin; The second affiliated hospital of Xingtai medical college, nursing department<br/> fan, ailing; The people's hospital of Langfang city, nursing department<br/> wang, yun; The first hospital of Qinhuangdao, nursing department<br/> yuan, meijin; The first affiliated hospital of Hebei north university, nursing department<br/> tong, li; Harrison international peace hospital, nursing department<br/> chen, shuling; Chengde central hospital, nursing department<br/> cui, jing; Dingzhou maternal and child health care hospital, nursing department<br/> zhao, meizhu; The first hospital of Xinji, nursing department<br/> cui, wei; Second Hospital of Hebei Medical University</p> |
| <b>Primary Subject Heading</b>: | Cardiovascular medicine                                                                                                                                                                                                                                                                                                                                                                                                                                                                                                                                                                                                                                                                                                                                                                                                                                                                                                                                                                                                                                                                                                                                                                                                                                                                                                                                                                               |
| Secondary Subject Heading:      | Epidemiology, Public health                                                                                                                                                                                                                                                                                                                                                                                                                                                                                                                                                                                                                                                                                                                                                                                                                                                                                                                                                                                                                                                                                                                                                                                                                                                                                                                                                                           |
| Keywords:                       | Hypertension < CARDIOLOGY, nurses, prevalence, guideline                                                                                                                                                                                                                                                                                                                                                                                                                                                                                                                                                                                                                                                                                                                                                                                                                                                                                                                                                                                                                                                                                                                                                                                                                                                                                                                                              |
|                                 |                                                                                                                                                                                                                                                                                                                                                                                                                                                                                                                                                                                                                                                                                                                                                                                                                                                                                                                                                                                                                                                                                                                                                                                                                                                                                                                                                                                                       |

SCHOLARONE™  
Manuscripts

1  
2  
3  
4  
5  
6  
7  
8  
9  
10  
11  
12  
13  
14  
15  
16  
17  
18  
19  
20  
21  
22  
23  
24  
25  
26  
27  
28  
29  
30  
31  
32  
33  
34  
35  
36  
37  
38  
39  
40  
41  
42  
43  
44  
45  
46  
47  
48  
49  
50  
51  
52  
53  
54  
55  
56  
57  
58  
59  
60

1  
2  
3  
4 **The prevalence of hypertension in 92815 nurses and its changes**  
5  
6 **according to the 2017 ACC/AHA hypertension guideline: an**  
7  
8 **observational cross-sectional study from China**  
9  
10  
11  
12  
13  
14

15 Bin Zhao, Jing Li, Jie Liu, Yuming Hao, Yanjie Zhen, Di Feng, Menghui Xu, Ximin  
16 Chen, Xiulan Yang, Aifang Zuo, Rufu Jia, Ruiqin Zhang, Ailing Fan, Yun Wang,  
17 Meijin Yuan, Li Tong, Shuling Chen, Jing Cui, Meizhu Zhao, Wei Cui  
18  
19

20  
21 Bin Zhao, RN, Professor, Head of the nursing department, The Second Hospital of  
22 Hebei medical university, Shijiazhuang, China;  
23  
24

25  
26 Jing Li, RN, nursing department, The second hospital of Hebei medical university,  
27 Shijiazhuang, China;  
28  
29

30  
31 Jie Liu, nursing department, RN, The second hospital of Hebei medical university,  
32 Shijiazhuang, China;  
33  
34

35 Yuming Hao, MD, Professor, department of cardiology, The second hospital of Hebei  
36 medical university, Shijiazhuang, China  
37  
38

39 Yanjie Zhen, RN, Head nurse, department of cardiology, The second hospital of  
40 Hebei medical university, Shijiazhuang, China;  
41  
42

43 Di Feng, RN, nursing department, The second hospital of Hebei medical university,  
44 Shijiazhuang, China;  
45  
46

47 Menghui Xu, RN, nursing department, The second hospital of Hebei medical  
48 university, Shijiazhuang, China;  
49  
50

51 Ximin Chen, RN, Head of the nursing department, The second hospital of Baoding,  
52 Baoding, China;  
53  
54

55  
56 Xiulan Yang, RN, Head of the nursing department, Tangshan gongren hospital,  
57 Tangshan, China;  
58  
59

60 Aifang Zuo, RN, Head of the nursing department, Handan central hospital, Handan,

1  
2  
3 China;

4  
5  
6 Rufu Jia, RN, Vice president of hospital, Cangzhou central hospital, Cangzhou,  
7 China;

8  
9  
10 Ruiqin Zhang, RN, Head of the nursing department, The Second affiliated hospital of  
11 Xingtai medical college, Xingtai, China;

12  
13  
14 Ailing Fan, RN, Head of the nursing department, The people's hospital of Langfang  
15 city, Langfang, China;

16  
17  
18 Yun Wang, RN, Head of the nursing department, The first hospital of Qinhuangdao,  
19 Qinhuangdao, China;

20  
21  
22 Meijin Yuan, RN, Head of the nursing department, The first affiliated hospital of  
23 Hebei north university, Zhangjiakou, China;

24  
25  
26 Li Tong, RN, Head of the nursing department, Harrison international peace hospital,  
27 Hengshui, China;

28  
29  
30 Shuling Chen, RN, Head of the nursing department, Chengde central hospital,  
31 Chengde, China;

32  
33  
34 Jing Cui, RN, Head of the nursing department, Dingzhou maternal and child health  
35 care hospital, Dingzhou, China;

36  
37  
38 Meizhu Zhao, RN, Head of the nursing department, The first hospital of Xinji, Xinji,  
39 China;

40  
41  
42 Wei Cui, corresponding author, MD, department of cardiology, The second hospital  
43 of Hebei medical university, 215 heping west road, Shijiazhuang, China,  
44 cuiwei21c@163.com, 860311-66002133  
45  
46  
47  
48  
49  
50

51 **Key words: hypertension,nurses,prevalence,guideline**

52  
53  
54 **Word count:4076**

55  
56  
57  
58 **Abstract**  
59  
60

1  
2  
3  
4 **Objectives**—This study aims to analyze the status of hypertension in  
5  
6 Chinese nursing staff and the changes in prevalence, awareness, treatment  
7  
8 and control rate of hypertension in Chinese nursing staffs based on the  
9  
10 2017 American College of Cardiology (ACC) /American Heart  
11  
12 Association (AHA) High Blood Pressure Guideline and the 2010 Chinese  
13  
14 guideline for the management of hypertension.  
15  
16  
17  
18  
19

20 **Design**—cross-sectional study.  
21  
22

23 **Setting**—512 medical institutions in 13 cities in Hebei province.  
24  
25

26  
27 **Participants**—The entire group of registered nurses from 512 medical  
28  
29 institutions in 13 cities in Hebei province (n=143772) were invited to  
30  
31 participate in the survey and those who refused to participate were  
32  
33 excluded. 93603 incumbent nurses aged 18-65 years agreed to participate  
34  
35 in the survey and submitted questionnaires online. A response rate of  
36  
37 65.11% was achieved. After excluding 788 individuals with missing or  
38  
39 incomplete questionnaires, 92815 participants were included in the final  
40  
41 analyses.  
42  
43  
44  
45  
46  
47

48 **Main outcome measures**—The prevalence, awareness, treatment and  
49  
50 control rates of hypertension.  
51  
52

53  
54 **Results**—92815 participants were included in the final analyses,  
55  
56 among which 3,677 men (3.96%) and 8,9138 women (96.04%). The  
57  
58  
59  
60



1  
2  
3  
4 mean age of participants was 31.65 (SD=7.47) years.  
5  
6

7  
8 There are 26,875 cases of hypertension in nursing staffs according to  
9  
10 the 2017 ACC/AHA guideline, with 20,551 cases added to a previous  
11  
12 number(6,324)according to the 2010 Chinese guideline. The prevalence  
13  
14 of hypertension among nursing staffs was 28.96% in the context of the  
15  
16 2017 ACC/AHA guideline, 3.25 times higher than that (6.81%) evaluated  
17  
18 by the criteria of the 2010 Chinese guideline .However, the awareness,  
19  
20 treatment and control rate (13.50%,10.73%,0.81%) were 3.25, 3.22 and  
21  
22 17.48 times lower than those (57.37%,45.30%,14.97%) based on the  
23  
24 2010 Chinese guideline, respectively.  
25  
26  
27  
28  
29

30  
31 **Conclusions**—There is still much room for improvement in the  
32  
33 awareness rate, drug treatment rate and control rate of hypertension  
34  
35 among nurses. Meanwhile, according to the 2017 ACC/AHA guideline,  
36  
37 the prevalence of hypertension in China will increase significantly, which  
38  
39 poses a more severe challenge to the management of hypertension in  
40  
41 China.  
42  
43  
44  
45  
46

#### 47 ***Strengths and limitations of this study***

48  
49  
50  
51 1.This study described the current status of the hypertension in  
52  
53 nurses according to the 2010 Chinese guideline and the 2017  
54  
55 ACC/AHA guideline.  
56  
57

58  
59 2. The large representative sample of individuals from 13 cities in  
60

1  
2  
3  
4 Hebei province enhanced the generalizability of the findings.  
5  
6

7  
8 3.The relationships between hypertension and specific factors  
9  
10 identified in this study were not all investigated.  
11  
12

### 13 ***Introduction***

14  
15  
16 With the rapid development of society and economy, the changes of  
17  
18 lifestyle and the aging of the population, hypertension has become one of  
19  
20 the most important public health issues in the world. Its complications are  
21  
22 associated with high morbidity and mortality, as well as high rate of  
23  
24 consumption of medical resources [1]. The direct economic burden caused  
25  
26 by hypertension in China in 2013 amounted to 210.3 billion yuan,  
27  
28 accounting for 6.61% of total expenditure on health of China[2-4].  
29  
30 According to the China Health and Nutrition Survey(CHNS) data from  
31  
32 1991 to 2011, the adjusted prevalence rate of hypertension in Chinese  
33  
34 over 18 years old increased from 15.6% to 20.9% , the prevalence rate of  
35  
36 hypertension increased[5], meanwhile, the awareness, treatment and  
37  
38 control rates were still low[6]. And the nursing staff, as a special class of  
39  
40 professional groups, whose work is of high intensity, frequent rotating  
41  
42 shift, and high stress level, blood pressure level should be paid more  
43  
44 attention[7, 8].  
45  
46  
47  
48  
49  
50  
51  
52  
53  
54

55  
56 The 2017 American Heart Association/American College of  
57  
58 Cardiology (AHA/ACC) guideline for the prevention, detection,  
59  
60

1  
2  
3  
4 evaluation, and management of high blood pressure (BP) in adults was  
5  
6 recently released. A significant transformation in the guideline is the shift  
7  
8 in the definition of hypertension, from systolic blood pressure (SBP)  $\geq$   
9  
10 140 mm Hg or diastolic blood pressure (DBP)  $\geq$  90 mm Hg to systolic  
11  
12 blood pressure (SBP)  $\geq$  130 mm Hg or diastolic blood pressure (DBP)  $\geq$   
13  
14 80 mm Hg. According to the 2017 AHA/ACC guideline, the prevalence  
15  
16 rate of hypertension increased from 31.9% to 45.6% in the United  
17  
18 States<sup>[9]</sup>.  
19  
20  
21  
22  
23  
24

25 The 2017 ACC/AHA guideline may have important effects on the  
26  
27 hypertension status noted across the globe<sup>[10-13]</sup>. There have been some  
28  
29 recent studies to explore the potential impacts of the updated guideline on  
30  
31 Chinese population. A nationally representative cross sectional study  
32  
33 examined the hypertension prevalence rate according to the  
34  
35 new guideline and found an absolute increase of 17.0% among adults  
36  
37 aged 45 to 75 years in China<sup>[14]</sup>. Additionally, a survey examined the  
38  
39 effects of the new guideline in Southwest China and found the prevalence  
40  
41 of hypertension was nearly twice the rate in the Chinese hypertension  
42  
43 guideline<sup>[15]</sup>. However, it is unclear the impact of the new guideline  
44  
45 on the hypertension status in different occupations in China. The  
46  
47 purpose of this study is to analyze the variation of prevalence, awareness,  
48  
49 treatment and control rates of hypertension in Chinese nursing staffs  
50  
51 based on the 2017 ACC/AHA guideline and the 2010 Chinese guideline.  
52  
53  
54  
55  
56  
57  
58  
59  
60

## METHODS

### Participants and data collection

This cross-sectional study was conducted between October 2016 to February 2017, using general survey design. The entire group of registered nurses from 512 medical institutions in 13 cities in Hebei province (n=143772) were invited to participate in the survey and those who refused to participate were excluded. 93,603 incumbent nurses aged 18-65 years agreed to participate in the survey and submitted questionnaires online. A response rate of 65.11% was achieved. After excluding 788 individuals with missing or incomplete questionnaires, 92815 participants were included in the final analyses.

Electronic folders were distributed to the Nursing Quality Control Center (NQCC) of each city through NQCC of Hebei Province. The folder contained three documents: the link of electronic questionnaire (SO JUMP), a document on blood pressure measurement precautions, and an investigation notice. Upon receiving the folder, the contact person of each NQCC sent it to the nursing department of all medical institutions in the region. The nursing department would send it to the head managers of departments, who organized the nurses to fill in the questionnaire online. A researcher reported the response rate to the NQCC of each city every day. The questionnaire content mainly involves: (1) demographic

1  
2  
3  
4 characteristic: hospital name, hospital grade, department, name, age,  
5  
6 gender, height, weight, etc. (2) systolic blood pressure, diastolic blood  
7  
8 pressure. (3) The risk factors associated with hypertension: monthly night  
9  
10 shift frequency, years of hyperlipidemia, years of diabetes, years of  
11  
12 hypertension, educational status, marital status, menstruation condition,  
13  
14 reproductive history, history of abortion, whether received hormone  
15  
16 replacement therapy, smoking habit, alcohol drinking, physical exercise,  
17  
18 family history of hypertension, etc<sup>[16-19]</sup>.  
19  
20  
21  
22  
23  
24

### 25 **Ethical considerations**

26  
27  
28  
29 The study was reviewed and approved by the Research Ethics Committee  
30  
31 of the Second Hospital of Hebei Medical University (No. 2016225).  
32  
33 Consent was implied by completion of the questionnaire. All participants  
34  
35 were voluntary and had every right to participate or refuse without any  
36  
37 reason. To protect the privacy of respondents, electronic data were saved  
38  
39 in secured computer of the hospital with restricted access.  
40  
41  
42  
43  
44

### 45 ***Participants and public involvement***

46  
47  
48  
49 In this study, self-report was adopted, and all the participants were nurses  
50  
51 who understand the effect of blood pressure measurement on themselves.  
52  
53 After receiving the notification of the blood pressure survey, all  
54  
55 participants filled in and submitted relevant data online, and those who  
56  
57 did not agree could refuse to participate. Although the study participants  
58  
59  
60

1  
2  
3  
4 or the public were not formally involved in the design and conduct of the  
5  
6 study, the questionnaire used for data collection and the specific  
7  
8 assessments conducted were developed based on previous experiences in  
9  
10 other surveys and expert opinions. The findings will be disseminated to  
11  
12 Municipal Nursing Quality and Control Center in Hebei Province, but not  
13  
14 to participating nurses directly.  
15  
16  
17  
18  
19

### 20 ***Measurement***

21  
22  
23 Blood pressure measurement and data reporting: the nursing staff  
24  
25 measured blood pressure by themselves and reported data through the  
26  
27 network. Although nurses master the blood pressure measurement  
28  
29 method generally, the researchers standardized the method of blood  
30  
31 pressure measurement and gave the relevant attention in order to reduce  
32  
33 measurement bias as much as possible. In order to ensure the accuracy of  
34  
35 the report and blood pressure data, a series of measures were adopted for  
36  
37 quality controlling. Firstly,our research group established a 3-level  
38  
39 supervision mechanism,which contained Nursing Quality Control Center,  
40  
41 Nursing departments at all levels and head nurses. Each day during  
42  
43 the investigations, research group members exported data from  
44  
45 information platform to conduct data analysis, calculate the number of  
46  
47 staffs who have finished the questionnaire in each hospital, then feed  
48  
49 back it to their municipal quality control centers for controlling  
50  
51  
52  
53  
54  
55  
56  
57  
58  
59  
60

1  
2  
3  
4 researching progress. Additionally, each questionnaire was checked and  
5  
6 verified by professional quality investigators. After that, the results of  
7  
8 verified data were sent to municipal quality control centers for  
9  
10 complementing the missing items and correcting mistakes. Finally, we  
11  
12 also attached important cautions while releasing announcement of taking  
13  
14 blood pressure.  
15  
16  
17  
18  
19

20 Blood pressure measurements: Chose a regular calibration of the  
21  
22 mercury sphygmomanometer or validated electronic sphygmomanometer.  
23  
24 Used the standard specification cuff with air bag length of 22cm and  
25  
26 width of 12cm. The obese individuals or individuals with large arm  
27  
28 circumference used a large size balloon cuff, and the upper arm was  
29  
30 wrapped up at least 80% by air bag. Each participant was asked to take a  
31  
32 rest at least for 5 minutes, any vigorous activity was avoided and  
33  
34 cigarettes, beverage containing caffeine like tea and coffee were  
35  
36 forbidden within 30 minutes, and empty the bladder before the blood  
37  
38 pressure measurement. Blood pressure was measured on a sitting  
39  
40 position, the right upper arm was measured without the cloth and with the  
41  
42 cuff at the same level as heart. Each participant was measured three times  
43  
44 with 1 min interval and the average of the last two readings was used for  
45  
46 analysis.  
47  
48  
49  
50  
51  
52  
53  
54  
55  
56

### 57 ***Definitions***

58  
59  
60

1  
2  
3  
4 Hypertension was defined as systolic BP (SBP)  $\geq 140$  mm Hg, or diastolic  
5  
6 BP (DBP)  $\geq 90$  mm Hg, and/or self-reported having an existing diagnosis  
7  
8 of hypertension in accordance with the 2010 Chinese guideline. The new  
9  
10 classification designates SBP  $\geq 130$  mm Hg or DBP  $\geq 80$  mm Hg  
11  
12 and/or self-reported having an existing diagnosis of hypertension as  
13  
14 hypertension according to the 2017 ACC/AHA guideline.  
15  
16  
17  
18  
19

20 The ratio of hypertension to total population was the prevalence of  
21  
22 hypertension. Awareness of hypertension was defined as any  
23  
24 self-reported previous diagnosis of hypertension by a health care  
25  
26 professional physician, treatment as self-reported use of a  
27  
28 prescription medication for hypertension management within the 2  
29  
30 weeks at the time of the interview, control as pharmacologic  
31  
32 treatment of hypertension associated with SBP  $< 140$  mm Hg and  
33  
34 DBP  $< 90$  mm Hg during previous 2 weeks.  
35  
36  
37  
38  
39  
40  
41

42 In addition, the study also estimated the prevalence (SBP  $\geq 130$  or  
43  
44 DBP  $\geq 80$  mm Hg) and control rate (SBP  $< 130$  and DBP  $< 80$  mm Hg)  
45  
46 of hypertension according to the 2017 ACC / AHA guideline.  
47  
48  
49

50 Response rate was defined as the number of nurses responding to  
51  
52 the questionnaire online divided by the total number of registered  
53  
54 nurses in Hebei Province.  
55  
56  
57  
58

### 59 ***Statistical analysis***

60



1  
2  
3  
4 All variables were statistically described, the normality of the  
5  
6 continuous variables was assessed, variables with a normal  
7  
8 distribution were presented as mean±standard deviation, variables  
9  
10 with a skewed distribution were reported with medians and  
11  
12 interquartile ranges (IQRs), and categorical data were presented by  
13  
14 the percentages description. The prevalence of hypertension as well  
15  
16 as awareness, treatment, and control rates of hypertension among  
17  
18 hypertensive participants were calculated according to the two  
19  
20 guidelines. In addition, we reported the prevalence for each of the  
21  
22 background characteristics of the study. Then we calculated the  
23  
24 distribution of the population across 5 groups including those not  
25  
26 having an existing diagnosis of hypertension with SBP/DBP  
27  
28 <120/<80 mm Hg, 120 to 129/<80 mm Hg, 130 to 139/80 to 89 mm  
29  
30 Hg, and  $\geq 140/90$  mm Hg, and those having an existing diagnosis of  
31  
32 hypertension. To investigate the factors associated with newly diagnosed  
33  
34 hypertension, the possible risk factors (gender, age, BMI, years of  
35  
36 hyperlipidemia, years of diabetes, smoking, alcohol drinking, family  
37  
38 history of hypertension) were incorporated into a multiple logistic  
39  
40 regression analysis. Analyses were performed by using SPSS V.21.0  
41  
42 software. A two-sided P value<0.05 was considered statistically  
43  
44 significant.  
45  
46  
47  
48  
49  
50  
51  
52  
53  
54  
55  
56  
57  
58  
59  
60

## ***Results***

## Demographic characteristics

Totally, 93,603 participants from 512 medical institutions in 13 cities were enrolled in this study, accounting for 65.11% of the total number of registered nurses in Hebei province. The main reason for non-response might be some invited nurses having retired but not logged out of the registration system, being on leave including maternity leave, study leave and other reasons during the period of data collection or refusing to participate. After excluding 788 individuals with missing or incomplete questionnaires (n=788), 92,815 participants were included in the final analyses, among which 3,677 men (3.96%) and 89,138 women (96.04%). The mean age of participants was 31.65 (SD=7.47) years (age range: 18–65 years). (Table 1).

**Table 1 Characteristics of study participants (N=92815)**

| Variable | N     | Percentage (%) | SBP                   | DBP                |
|----------|-------|----------------|-----------------------|--------------------|
| Overall  | 92815 | 100            | 110.00(102.00-120.00) | 70.00(64.00-80.00) |
| Gender   |       |                |                       |                    |
| Female   | 89138 | 96.04          | 110.00(101.00-120.00) | 70.00(63.00-80.00) |
| Male     | 3677  | 3.96           | 123.00(120.00-130.00) | 80.00(75.00-85.00) |

1  
2  
3  
4  
5  
6  
7  
8  
9  
10  
11  
12  
13  
14  
15  
16  
17  
18  
19  
20  
21  
22  
23  
24  
25  
26  
27  
28  
29  
30  
31  
32  
33  
34  
35  
36  
37  
38  
39  
40  
41  
42  
43  
44  
45  
46  
47  
48  
49  
50  
51  
52  
53  
54  
55  
56  
57  
58  
59  
60

|                          |       |       |                       |                    |  |
|--------------------------|-------|-------|-----------------------|--------------------|--|
| Age,y*                   |       |       |                       |                    |  |
| 18-25                    | 17289 | 18.63 | 110.00(102.00-120.00) | 70.00(63.00-78.00) |  |
| 26-35                    | 53799 | 57.96 | 110.00(100.00-120.00) | 70.00(62.00-78.00) |  |
| 36-45                    | 14989 | 16.15 | 110.00(105.00-120.00) | 70.00(65.00-80.00) |  |
| 46-55                    | 6376  | 6.87  | 120.00(110.00-130.00) | 80.00(70.00-85.00) |  |
| 56-65                    | 250   | 0.27  | 130.00(120.00-135.00) | 80.00(75.00-86.13) |  |
| Missing data             | 112   | 0.12  | -                     | -                  |  |
| BMI,kg/m <sup>2</sup> *a |       |       |                       |                    |  |
| Underweight              | 7037  | 7.58  | 106.00(99.00-110.00)  | 68.00(60.00-70.00) |  |
| Normal                   | 57077 | 61.50 | 110.00(100.00-120.00) | 70.00(60.50-77.00) |  |
| Overweight               | 22235 | 23.96 | 118.00(110.00-123.00) | 72.00(70.00-80.00) |  |
| Obese                    | 6253  | 6.74  | 120.00(110.00-130.00) | 79.00(70.00-80.00) |  |
| Missing data             | 213   | 0.23  | -                     | -                  |  |
| Years of hyperlipidemia* |       |       |                       |                    |  |
| 0                        | 86900 | 93.63 | 110.00(101.00-120.00) | 70.00(63.00-80.00) |  |
| ~5                       | 4837  | 5.21  | 120.00(110.00-130.00) | 80.00(70.00-85.00) |  |
| ~10                      | 636   | 0.69  | 125.50(110.00-140.00) | 80.00(70.00-90.00) |  |
| >10                      | 127   | 0.14  | 128.00(120.00-140.00) | 82.00(76.00-90.00) |  |
| Missing data             | 315   | 0.34  | -                     | -                  |  |
| Years of diabetes*       |       |       |                       |                    |  |
| 0                        | 91886 | 99.00 | 110.00(102.00-120.00) | 70.00(64.00-80.00) |  |
| ~5                       | 625   | 0.67  | 123.00(110.00-138.00) | 80.00(70.00-90.00) |  |
| ~10                      | 164   | 0.18  | 120.00(110.00-130.00) | 80.00(70.00-90.00) |  |

|                                |       |       |                       |                    |
|--------------------------------|-------|-------|-----------------------|--------------------|
| >10                            | 56    | 0.06  | 129.73 ± 18.05        | 80.00(75.25-90.00) |
| Missing data                   | 84    | 0.09  | -                     | -                  |
| Smoking                        |       |       |                       |                    |
| Never                          | 91020 | 98.07 | 110.00(102.00-120.00) | 70.00(64.00-80.00) |
| <10 cigarettes/day             | 1280  | 1.38  | 110.00(105.25-120.00) | 70.00(66.00-80.00) |
| 10-20 cigarettes/day           | 419   | 0.45  | 110.00(105.00-120.00) | 70.00(68.00-80.00) |
| >20 cigarettes/day             | 96    | 0.10  | 110.00(102.75-120.00) | 70.00(70.00-80.00) |
| Alcohol drinking               |       |       |                       |                    |
| Never                          | 45984 | 49.54 | 110.00(102.00-120.00) | 70.00(64.00-80.00) |
| Occasionally                   | 46263 | 49.84 | 110.00(102.00-120.00) | 70.00(64.00-80.00) |
| Often                          | 568   | 0.61  | 110.00(102.00-120.00) | 70.00(69.25-80.00) |
| Family history of hypertension |       |       |                       |                    |
| Yes                            | 44451 | 47.89 | 110.00(102.00-120.00) | 70.00(64.00-80.00) |
| No                             | 48364 | 52.11 | 110.00(102.00-120.00) | 70.00(64.00-80.00) |

note: \* with the missing data

<sup>a</sup>BMI was used to classify participants into categories of underweight (<18.5), normal weight (18.5 to <24), overweight (24 to <28) and obese (≥28).

BMI-body mass index, SBP-systolic blood pressure, DBP-diastolic blood pressure

## 2.2 Prevalence, awareness, treatment and control rate of hypertension in Chinese nurses according to the two edition of the guidelines

According to the 2017 ACC/AHA guideline, the prevalence of hypertension increased from 6.81% to 28.96%, and the prevalence rate

was 3.25 times higher than that defined in the 2010 Chinese guideline (female 3.36 times, male 2.35 times). However, the awareness rate of hypertension was 23.53% of that according to the 2010 Chinese guideline (female 22.90% , male 29.86%). The rate of drug treatment was 23.69% of that according to the 2010 Chinese guideline (female 23.04% , male 29.98%). The control rate of hypertension was 5.41% of that according to the 2010 Chinese guideline (female 5.40% , male 3.96%). (Table 2).

**Table 2 Prevalence, awareness, treatment and control rate of hypertension**

| Participants | Diagnostic criteria for hypertension | Prevalence(95%CI)  | Awareness(95%CI)   | Treatment(95%CI)   | Control(95%CI)     |
|--------------|--------------------------------------|--------------------|--------------------|--------------------|--------------------|
| Overall      | $\geq 140/90^a$                      | 6.81(6.65- 6.97)   | 57.37(57.05-57.69) | 45.30(44.98-45.62) | 14.97(14.74-15.20) |
| (N=92815)    | $\geq 130/80^b$                      | 28.96(28.67-29.25) | 13.50(13.28-13.72) | 10.73(10.53-10.93) | 0.81( 0.75- 0.87)  |
| Female       | $\geq 140/90^a$                      | 6.28(6.12- 6.44)   | 58.52(58.20-58.84) | 46.74(46.41-47.07) | 16.10(15.86-16.34) |
| (N=89138)    | $\geq 130/80^b$                      | 27.41(27.12-27.70) | 13.40(13.18-13.62) | 10.77(10.57-10.97) | 0.87( 0.81- 0.93)  |
| Male         | $\geq 140/90^a$                      | 19.83(18.54-21.12) | 48.56(46.94-50.18) | 34.29(32.76-35.82) | 6.31( 5.52- 7.10)  |
| (N=3677)     | $\geq 130/80^b$                      | 66.41(64.88-67.94) | 14.50(13.36-15.64) | 10.28(09.30-11.26) | 0.25( 0.09- 0.41)  |

a According to the diagnostic criteria for hypertension in the 2010 Chinese guideline

b According to the diagnostic criteria for hypertension in the 2017 edition of the guideline

CI-confidence interval

### 2.3 Multi-dimensional Comparative Analysis of hypertension prevalence among nursing staff

1  
2  
3  
4 According to the 2017 ACC/AHA guideline, the number of people with  
5  
6 high blood pressure in nursing staff rose from 6,324 to 26,875, with a  
7  
8 total increase of 20,551. (Table 3). The prevalence rate of hypertension  
9  
10 has increased by 3.25 times, from 6.81% to 28.96%. The prevalence of  
11  
12 hypertension in female and male nurses increased by 3.36 and 2.35 times,  
13  
14  
15 respectively.  
16  
17

18  
19  
20 The prevalence of hypertension stratified by age (18-25, 26-35, 36-45,  
21  
22 46-55, and over 55 years) increased by 8.61, 4.97, 1.96, 1.04, and 1.03  
23  
24 times, respectively.  
25  
26

27  
28  
29 The prevalence of hypertension stratified by BMI (underweight,  
30  
31 normal weight, overweight and obese) increased by 5.73, 4.42, 2.54 and  
32  
33 1.93 times, respectively.  
34  
35

36  
37  
38 The prevalence of hypertension stratified by years of  
39  
40 hyperlipidemia(0,0~5,5~10, > 10) increased by 4.25, 0.90 ,0.43 and 0.56  
41  
42 times,respectively.  
43  
44

45  
46  
47 The prevalence of hypertension stratified by years of diabetes  
48  
49 (0,0~5,5~10, > 10) increased by 3.42, 0.53, 0.55 and 0.50 times,  
50  
51 respectively.  
52  
53

54  
55  
56 The prevalence of hypertension stratified by the history of  
57  
58 smoking(never, < 10 cigarettes/day,10-20 cigarettes/day, > 20  
59  
60 cigarettes/day) increased by3.24 ,3.77,3.34 and 5.20 times,respectively.

1  
2  
3  
4 The prevalence of hypertension stratified by the history of  
5  
6 drinking(never,occasionally,often) increased by 3.29, 3.22 and 3.14  
7  
8 times, respectively.  
9

10  
11  
12 The prevalence of hypertension stratified by family history of  
13  
14 hypertension(yes,no) increased by 3.30 and 3.21 times ,respectively.  
15  
16

17  
18 Table 4 shows that 60.68%, 10.36%, 22.14%, and 2.90% of nurses not  
19  
20 having an existing diagnosis of hypertension had SBP/DBP levels of  
21  
22 <120/80 mm Hg, 120 to 129/<80 mm Hg, 130 to 139/80 to 89 mm Hg,  
23  
24 and  $\geq$ 140/90 mm Hg, respectively. Additionally, 3.91% nurses were  
25  
26 having an existing diagnosis of hypertension. Among nurses not having  
27  
28 an existing diagnosis of hypertension, nurses with higher BP were older  
29  
30 and were more likely to be men, be overweight or obese, having  
31  
32 hyperlipidemia for less than 10 years, and have diabetes for less than 5  
33  
34 years.  
35  
36  
37  
38  
39  
40  
41

42  
43 Table 5 shows that gender (OR 0.647, 95% CI 0.585 to 0.716,  
44  
45  $p<0.001$ ), age (OR 0.538, 95% CI 0.520 to 0.557,  $p<0.001$ ), BMI (OR  
46  
47 0.760, 95% CI 0.729 to 0.791,  $p<0.001$ ), years of hyperlipidemia (OR  
48  
49 0.426, 95% CI 0.397 to 0.458,  $p<0.001$ ) and years of diabetes (OR 0.597,  
50  
51 95% CI 0.517 to 0.690,  $p<0.001$ ) were factors significantly associated  
52  
53 with newly diagnosed hypertension.  
54  
55  
56  
57  
58

59 The female are more likely to be newly diagnosed with hypertension  
60

than male according to the 2017 ACC/AHA guideline. Participants with no hyperlipidemia, no diabetes, lower age and lower BMI value are more likely to be newly diagnosed with hypertension.

**Table 3 Comparison of hypertension prevalence among nursing staff**

| Variable                        | N     | ≥140/90 <sup>a</sup> |                    | ≥130/80 <sup>b</sup> |                    | $\chi^2$<br>Value | P<br>Value |
|---------------------------------|-------|----------------------|--------------------|----------------------|--------------------|-------------------|------------|
|                                 |       | Hypertension         | Prevalence         | Hypertension         | Prevalence         |                   |            |
| <b>Gender</b>                   |       |                      |                    |                      |                    |                   |            |
| Female                          | 89138 | 5595                 | 6.28( 6.12- 6.44)  | 24433                | 27.41(27.12-27.70) | 14211.74          | <0.001     |
| Male                            | 3677  | 729                  | 19.83(18.54-21.12) | 2442                 | 66.41(64.88-67.94) | 1626.88           | <0.001     |
| <b>Age,y*</b>                   |       |                      |                    |                      |                    |                   |            |
| 18-25                           | 17289 | 448                  | 2.59( 2.35- 2.83)  | 4303                 | 24.89(24.25-25.53) | 3626.22           | <0.001     |
| 26-35                           | 53799 | 2263                 | 4.21( 4.04- 4.38)  | 13532                | 25.15(24.78-25.52) | 9423.20           | <0.001     |
| 36-45                           | 14989 | 1784                 | 11.90(11.38-12.42) | 5284                 | 35.25(34.49-36.01) | 2267.87           | <0.001     |
| 46-55                           | 6376  | 1726                 | 27.07(25.98-28.16) | 3524                 | 55.27(54.05-56.49) | 1046.70           | <0.001     |
| 56-65                           | 250   | 91                   | 36.40(30.44-42.36) | 185                  | 74.00(68.56-79.44) | 71.46             | <0.001     |
| <b>BMI,kg/m<sup>2</sup> C*</b>  |       |                      |                    |                      |                    |                   |            |
| Underweight                     | 7037  | 153                  | 2.17( 1.83- 2.51)  | 1028                 | 14.61(13.78-15.44) | 707.67            | <0.001     |
| Normal                          | 57077 | 2501                 | 4.38( 4.21- 4.55)  | 13552                | 23.74(23.39-24.09) | 8852.47           | <0.001     |
| Overweight                      | 22235 | 2527                 | 11.36(10.94-11.78) | 8941                 | 40.21(39.57-40.85) | 4833.89           | <0.001     |
| Obese                           | 6253  | 1120                 | 17.91(16.96-18.86) | 3280                 | 52.45(51.21-53.69) | 1635.94           | <0.001     |
| <b>Years of hyperlipidemia*</b> |       |                      |                    |                      |                    |                   |            |
| 0                               | 86900 | 4473                 | 5.15( 5.00- 5.30)  | 23495                | 27.04(26.74-27.34) | 15418.70          | <0.001     |



|    |                 |       |      |                    |       |                    |          |        |
|----|-----------------|-------|------|--------------------|-------|--------------------|----------|--------|
| 1  |                 |       |      |                    |       |                    |          |        |
| 2  |                 |       |      |                    |       |                    |          |        |
| 3  | ~5              | 4837  | 1431 | 29.58(28.29-30.87) | 2712  | 56.07(54.67-57.47) | 692.76   | <0.001 |
| 4  |                 |       |      |                    |       |                    |          |        |
| 5  | ~10             | 636   | 292  | 45.91(42.04-49.78) | 417   | 65.57(61.88-69.26) | 49.79    | <0.001 |
| 6  |                 |       |      |                    |       |                    |          |        |
| 7  | >10             | 127   | 61   | 48.03(39.34-56.72) | 95    | 74.80(67.25-82.35) | 19.21    | <0.001 |
| 8  |                 |       |      |                    |       |                    |          |        |
| 9  |                 |       |      |                    |       |                    |          |        |
| 10 |                 |       |      |                    |       |                    |          |        |
| 11 | Years of        |       |      |                    |       |                    |          |        |
| 12 | diabetes*       |       |      |                    |       |                    |          |        |
| 13 |                 |       |      |                    |       |                    |          |        |
| 14 | 0               | 91886 | 5951 | 6.48( 6.32- 6.64)  | 26285 | 28.61(28.32-28.90) | 15554.93 | <0.001 |
| 15 |                 |       |      |                    |       |                    |          |        |
| 16 | ~5              | 625   | 270  | 43.20(39.32-47.08) | 413   | 66.08(62.37-69.79) | 66.01    | <0.001 |
| 17 |                 |       |      |                    |       |                    |          |        |
| 18 | ~10             | 164   | 64   | 39.02(31.55-46.49) | 99    | 60.37(52.88-67.86) | 14.94    | <0.001 |
| 19 |                 |       |      |                    |       |                    |          |        |
| 20 | >10             | 56    | 30   | 53.57(40.51-66.63) | 45    | 80.36(69.95-90.77) | 9.08     | 0.003  |
| 21 |                 |       |      |                    |       |                    |          |        |
| 22 |                 |       |      |                    |       |                    |          |        |
| 23 |                 |       |      |                    |       |                    |          |        |
| 24 | Smoking         |       |      |                    |       |                    |          |        |
| 25 |                 |       |      |                    |       |                    |          |        |
| 26 | Never           | 91020 | 6200 | 6.81( 6.65- 6.97)  | 26290 | 28.88(28.59-29.17) | 15121.35 | <0.001 |
| 27 |                 |       |      |                    |       |                    |          |        |
| 28 | <10             | 1280  | 87   | 6.80( 5.42- 8.18)  | 415   | 32.42(29.86-34.98) | 266.59   | <0.001 |
| 29 | cigarettes/day  |       |      |                    |       |                    |          |        |
| 30 |                 |       |      |                    |       |                    |          |        |
| 31 | 10-20           | 419   | 32   | 7.64( 5.10-10.18)  | 139   | 33.17(28.66-37.68) | 84.12    | <0.001 |
| 32 | cigarettes/day  |       |      |                    |       |                    |          |        |
| 33 |                 |       |      |                    |       |                    |          |        |
| 34 | >20             | 96    | 5    | 5.21( 0.76- 9.66)  | 31    | 32.29(22.94-41.64) | 23.11    | <0.001 |
| 35 | cigarettes/day  |       |      |                    |       |                    |          |        |
| 36 |                 |       |      |                    |       |                    |          |        |
| 37 | Alcohol         |       |      |                    |       |                    |          |        |
| 38 | drinking        |       |      |                    |       |                    |          |        |
| 39 |                 |       |      |                    |       |                    |          |        |
| 40 | Never           | 45984 | 3085 | 6.71( 6.48- 6.94)  | 13226 | 28.76(28.35-29.17) | 7664.23  | <0.001 |
| 41 |                 |       |      |                    |       |                    |          |        |
| 42 | Occasionally    | 46263 | 3194 | 6.90( 6.67- 7.13)  | 13463 | 29.10(28.69-29.51) | 7720.74  | <0.001 |
| 43 |                 |       |      |                    |       |                    |          |        |
| 44 | Often           | 568   | 45   | 7.92( 5.70-10.14)  | 186   | 32.75(28.89-36.61) | 108.03   | <0.001 |
| 45 |                 |       |      |                    |       |                    |          |        |
| 46 | Family history  |       |      |                    |       |                    |          |        |
| 47 | of hypertension |       |      |                    |       |                    |          |        |
| 48 |                 |       |      |                    |       |                    |          |        |
| 49 | Yes             | 44451 | 2967 | 6.67( 6.44- 6.90)  | 12743 | 28.67(28.25-29.09) | 7389.14  | <0.001 |
| 50 |                 |       |      |                    |       |                    |          |        |
| 51 | No              | 48364 | 3357 | 6.94( 6.71- 7.17)  | 14132 | 29.22(28.81-29.63) | 8103.69  | <0.001 |
| 52 |                 |       |      |                    |       |                    |          |        |
| 53 |                 |       |      |                    |       |                    |          |        |
| 54 |                 |       |      |                    |       |                    |          |        |
| 55 |                 |       |      |                    |       |                    |          |        |
| 56 |                 |       |      |                    |       |                    |          |        |
| 57 |                 |       |      |                    |       |                    |          |        |
| 58 |                 |       |      |                    |       |                    |          |        |
| 59 |                 |       |      |                    |       |                    |          |        |
| 60 |                 |       |      |                    |       |                    |          |        |

\* with the missing data

a According to the diagnostic criteria for hypertension in 2010 Chinese guideline

b According to the diagnostic criteria for hypertension in the 2017 edition of the guideline

c BMI was classified into underweight (<18.5), normal weight (18.5 to <24), overweight (24 to <28) and obese (≥28).

BMI-body mass index

**Table 4 Characteristics of study participants by blood pressure levels (N=92815)**

| Variable                         | Nurses not having an existing diagnosis of hypertension |                         |                            |                     | having an existing diagnosis of hypertension |
|----------------------------------|---------------------------------------------------------|-------------------------|----------------------------|---------------------|----------------------------------------------|
|                                  | <120/80<br>(n=56320)                                    | 120-129/<80<br>(n=9620) | 130-139/80-89<br>(n=20551) | ≥140/90<br>(n=2696) |                                              |
| Percentage of study participants | 60.68<br>(60.28-61.08)                                  | 10.36<br>(9.75-10.97)   | 22.14<br>(21.57-22.71)     | 2.90<br>(2.27-3.53) | 3.91<br>(3.28-4.54)                          |
| Gender                           |                                                         |                         |                            |                     |                                              |
| Female                           | 55669(98.84)                                            | 9036(93.93)             | 18838(91.66)               | 2321(86.09)         | 3274(90.24)                                  |
| Male                             | 651(1.16)                                               | 584(6.07)               | 1713(8.34)                 | 375(13.91)          | 354(9.76)                                    |
| Age,y*                           | 29.00(26.00-34.00)                                      | 30.00(27.00-35.00)      | 30.00(26.00-36.00)         | 31.00(27.00-40.00)  | 43.00(35.00-49.00)                           |
| BMI* <sup>a</sup>                |                                                         |                         |                            |                     |                                              |
| Underweight                      | 5587(9.92)                                              | 422(4.39)               | 875(4.26)                  | 109(4.04)           | 44(1.21)                                     |
| Normal                           | 38076(67.61)                                            | 5449(56.64)             | 11051(53.77)               | 1220(45.25)         | 1281(35.31)                                  |
| Overweight                       | 10363(18.40)                                            | 2931(30.47)             | 6414(31.21)                | 926(34.35)          | 1601(44.13)                                  |
| Obese                            | 2176(3.86)                                              | 797(8.28)               | 2160(10.51)                | 428(15.88)          | 692(19.07)                                   |
| Missing data                     | 118(0.21)                                               | 21(0.22)                | 51(0.25)                   | 13(0.48)            | 10(0.28)                                     |
| Years of hyperlipidemia*         |                                                         |                         |                            |                     |                                              |

|    |                    |              |             |              |             |             |
|----|--------------------|--------------|-------------|--------------|-------------|-------------|
| 1  |                    |              |             |              |             |             |
| 2  |                    |              |             |              |             |             |
| 3  |                    |              |             |              |             |             |
| 4  | 0                  | 54352(96.51) | 9053(94.11) | 19022(92.56) | 2373(88.02) | 2100(57.88) |
| 5  |                    |              |             |              |             |             |
| 6  | ~5                 | 1652(2.93)   | 473(4.92)   | 1281(6.23)   | 251(9.31)   | 1180(32.52) |
| 7  |                    |              |             |              |             |             |
| 8  | ~10                | 167(0.30)    | 52(0.54)    | 125(0.61)    | 39(1.45)    | 253(6.97)   |
| 9  |                    |              |             |              |             |             |
| 10 | >10                | 26(0.05)     | 6(0.06)     | 34(0.17)     | 1(0.04)     | 60(1.65)    |
| 11 |                    |              |             |              |             |             |
| 12 |                    |              |             |              |             |             |
| 13 | Missing data       | 123(0.22)    | 36(0.37)    | 89(0.43)     | 32(1.19)    | 35(0.96)    |
| 14 |                    |              |             |              |             |             |
| 15 | Years of diabetes* |              |             |              |             |             |
| 16 |                    |              |             |              |             |             |
| 17 |                    |              |             |              |             |             |
| 18 | 0                  | 56053(99.53) | 9548(99.25) | 20334(98.94) | 2649(98.26) | 3302(91.01) |
| 19 |                    |              |             |              |             |             |
| 20 | ~5                 | 167(0.30)    | 45(0.47)    | 143(0.70)    | 31(1.15)    | 239(6.59)   |
| 21 |                    |              |             |              |             |             |
| 22 | ~10                | 47(0.08)     | 18(0.19)    | 35(0.17)     | 10(0.37)    | 54(1.49)    |
| 23 |                    |              |             |              |             |             |
| 24 | >10                | 10(0.02)     | 1(0.01)     | 15(0.07)     | 1(0.04)     | 29(0.80)    |
| 25 |                    |              |             |              |             |             |
| 26 |                    |              |             |              |             |             |
| 27 | Missing data       | 43(0.08)     | 8(0.08)     | 24(0.12)     | 5(0.19)     | 4(0.11)     |
| 28 |                    |              |             |              |             |             |
| 29 |                    |              |             |              |             |             |
| 30 | Smoking            |              |             |              |             |             |
| 31 |                    |              |             |              |             |             |
| 32 | Never              | 55276(98.15) | 9454(98.27) | 20090(97.76) | 2644(98.07) | 3556(98.02) |
| 33 |                    |              |             |              |             |             |
| 34 | <10 cigarettes/day | 740(1.31)    | 125(1.30)   | 328(1.60)    | 37(1.37)    | 50(1.38)    |
| 35 |                    |              |             |              |             |             |
| 36 |                    |              |             |              |             |             |
| 37 | 10-20              | 251(0.45)    | 29(0.30)    | 107(0.52)    | 12(0.45)    | 20(0.55)    |
| 38 | cigarettes/day     |              |             |              |             |             |
| 39 |                    |              |             |              |             |             |
| 40 | >20 cigarettes/day | 53(0.09)     | 12(0.12)    | 26(0.13)     | 3(0.11)     | 2(0.06)     |
| 41 |                    |              |             |              |             |             |
| 42 |                    |              |             |              |             |             |
| 43 | Alcohol drinking   |              |             |              |             |             |
| 44 |                    |              |             |              |             |             |
| 45 | Never              | 27936(49.60) | 4822(50.12) | 10141(49.35) | 1280(47.48) | 1805(49.75) |
| 46 |                    |              |             |              |             |             |
| 47 | Occasionally       | 28056(49.82) | 4744(49.31) | 10269(49.97) | 1402(52.00) | 1792(49.39) |
| 48 |                    |              |             |              |             |             |
| 49 | Often              | 328(0.58)    | 54(0.56)    | 141(0.69)    | 14(0.52)    | 31(0.85)    |
| 50 |                    |              |             |              |             |             |
| 51 |                    |              |             |              |             |             |
| 52 | Family history of  |              |             |              |             |             |
| 53 | hypertension       |              |             |              |             |             |
| 54 |                    |              |             |              |             |             |
| 55 |                    |              |             |              |             |             |
| 56 | Yes                | 27017(47.97) | 4691(48.76) | 9776(47.57)  | 1259(46.70) | 1708(47.08) |
| 57 |                    |              |             |              |             |             |
| 58 | No                 | 29303(52.03) | 4929(51.24) | 10775(52.43) | 1437(53.30) | 1920(52.92) |
| 59 |                    |              |             |              |             |             |
| 60 |                    |              |             |              |             |             |

|            |                       |                       |                       |                       |                       |
|------------|-----------------------|-----------------------|-----------------------|-----------------------|-----------------------|
| SBP, mm Hg | 108.00(100.00-110.00) | 120.00(120.00-123.00) | 120.00(120.00-125.00) | 130.00(120.00-140.00) | 140.00(130.00-145.00) |
| DBP, mm Hg | 68.00(60.00-70.00)    | 70.00(70.00-75.00)    | 80.00(80.00-80.00)    | 90.00(90.00-90.00)    | 90.00(85.00-95.00)    |

Participants were grouped into the higher category of SBP and DBP. For example, if a person had SBP of 142 mm Hg and DBP of 88 mm Hg, she/he was grouped into the  $\geq 140/90$  mm Hg category.

\* with the missing data

<sup>a</sup> BMI was used to classify participants into categories of underweight (<18.5), normal weight (18.5 to <24), overweight (24 to <28) and obese ( $\geq 28$ ).

BMI-body mass index; SBP-systolic blood pressure; DBP-diastolic blood pressure

**Table 5 Multiple logistic regression of factors associated with newly diagnosed hypertension**

| Variables               | OR    | 95% CI         | P      |
|-------------------------|-------|----------------|--------|
| Gender                  | 0.647 | 0.585 to 0.716 | <0.001 |
| Age,y                   | 0.538 | 0.520 to 0.557 | <0.001 |
| BMI,kg/m <sup>2</sup>   | 0.760 | 0.729 to 0.791 | <0.001 |
| Years of hyperlipidemia | 0.426 | 0.397 to 0.458 | <0.001 |
| Years of diabetes       | 0.597 | 0.517 to 0.690 | <0.001 |
| Smoking                 | 1.070 | 0.921 to 1.243 | 0.379  |
| Alcohol drinking        | 0.962 | 0.906 to 1.022 | 0.210  |

|                                |       |                |       |
|--------------------------------|-------|----------------|-------|
| Family history of hypertension | 0.946 | 0.890 to 1.006 | 0.077 |
|--------------------------------|-------|----------------|-------|

---

BMI-body mass index,OR-odds ratio,CI-confidence interval

## ***Discussion***

At present, there are few studies on the current status of hypertension among nurses. This study is a cross-sectional survey based on a large sample of nursing staff. The final analyses included 92815 participants, who were from 512 medical institutions in 13 cities in Hebei province. According to the 2010 Chinese guideline, the prevalence rate of hypertension was 6.81% in this study. Therefore, we should pay more attention to the health condition of nurses. Li *et al*<sup>[20]</sup> investigated 4032 cardiovascular physicians from 386 hospitals in China. The results showed that the prevalence of hypertension among cardiovascular physicians was 13.1%. Liu *et al*<sup>[21]</sup> analyzed the prevalence of hypertension among 1369 medical staff in a tertiary academic hospital in Zhengzhou, and the prevalence of hypertension was 18.33%. The prevalence of hypertension in this survey was lower than the above level, which may be related to the lower age and the greater proportion of women of nursing staff. The report of China Health and Family Planning Commission indicated that the awareness rate of hypertension among people over 18 years old in China was 46.5%, the drug treatment rate was 41.1%, and the control rate was 13.8% in 2012<sup>[22]</sup>. In addition, a survey<sup>[23]</sup>

1  
2  
3  
4 of 174,621 people aged 18 years or older in 31 provinces in China from  
5  
6 2013 to 2014 showed that the awareness, treatment and control rate were  
7  
8 31.9%, 26.4% and 9.7%, respectively. Lixin Jiang *et al*<sup>[24]</sup> made use of  
9  
10 data generated in the China Patient-Centered Evaluative Assessment of  
11  
12 Cardiac Events (PEACE) Million Persons Project from 2014 to 2017, a  
13  
14 population-based screening project that enrolled around 1.7 million adults  
15  
16 aged 35-75 years from all 31 provinces in mainland China. The  
17  
18 age-standardised and sex-standardised rates of hypertension prevalence,  
19  
20 awareness, treatment, and control were 37.2%, 36.0% , 22.9% and 5.7% ,  
21  
22 respectively. In this survey, the awareness rate of hypertension in nursing  
23  
24 staff was 57.37%, the rate of treatment was 45.30%, and the control rate  
25  
26 was 14.7%, all higher than the above results. However, the control rate of  
27  
28 hypertension among female nurses was 16.10%, and among male  
29  
30 nursing staff was only 6.31%. The awareness rate and treatment rate of  
31  
32 nursing staff were slightly higher than those of the above research results.  
33  
34 As a medical worker, the awareness rate of hypertension and the rate of  
35  
36 drug treatment should have been higher. The survey showed that there is  
37  
38 still much room for improvement in the awareness rate of hypertension.  
39  
40  
41  
42  
43  
44  
45  
46  
47  
48  
49

50  
51 In this study, we sought to assess the potential impact of the new  
52  
53 hypertension guidelines on the status of blood pressure in clinical nurses.  
54  
55 According to the 2017 ACC/AHA guideline, the hypertension prevalence  
56  
57 rate of nursing personnel in the survey increased to 28.96%, which  
58  
59  
60

1  
2  
3  
4 increased 4.15 times among nurses under the 45 years old and 1.04 times  
5  
6 among nurses of 45 years of age or older. The prevalence rate of the  
7  
8 population with no hyperlipidemia, no diabetes, lower age and BMI value  
9  
10 will increase, suggesting that more low-risk population will be diagnosed  
11  
12 with hypertension. Meanwhile, the awareness rate, drug treatment rate  
13  
14 and control rate of hypertension among Chinese nurses decreased from  
15  
16 57.37%, 45.30% and 14.97% to 13.50%, 10.73% and 0.81%,  
17  
18 respectively.  
19  
20  
21  
22  
23

24  
25 A study from South Korea showed that in the cross-sectional study  
26  
27 with 15,784 adults, the prevalence of hypertension was estimated to be  
28  
29 49.2% based on the BP criteria suggested by the 2017 ACC/AHA  
30  
31 guidelines, which was a significant increase compared to the 30.4%  
32  
33 prevalence rate based on the previous definitions, the control rate  
34  
35 decreased from 59.5 to 16.1<sup>[25]</sup>. And a study from Nepal found that if the  
36  
37 ACC/AHA guideline was used, the overall prevalence of hypertension in  
38  
39 Nepal would approximately double (from 21.2% to 44.2%)<sup>[26]</sup>. According  
40  
41 to the standards of the new guidelines, the prevalence of hypertension  
42  
43 among nurses in China is lower than the above two studies, which may be  
44  
45 related to the fact that nurses are more female, lower in age level, and  
46  
47 have more medical knowledge and resources. In addition, the difference  
48  
49 could be due to several factors, including Nepal's predominantly rural  
50  
51 population, relatively young population structure, and low income.  
52  
53  
54  
55  
56  
57  
58  
59  
60

1  
2  
3  
4 However, it is worth noting that the hypertension control rate among  
5  
6 nurses according to the new standard is very low, only 0.81.  
7  
8 Nurses as health care workers, they tend to own relatively adequate  
9  
10 medical knowledge, and they are supposed to be more familiar with the  
11  
12 medical environment and medical resources, but there still is a situation  
13  
14 that a number of the nursing personnel neglecting their own blood  
15  
16 pressure condition, consequently, it is urgent to enhance their awareness  
17  
18 of health management and blood pressure monitoring. Our task is  
19  
20 endeavor to achieve the target of early diagnosis, early treatment and  
21  
22 early control of high blood pressure so that high blood pressure and  
23  
24 related diseases can be effectively prevented and controlled. It has been  
25  
26 reported that treatment of hypertension can reduce the risk of stroke and  
27  
28 myocardial infarction by 30-43% and 15%, respectively, along with  
29  
30 reducing the risk of a number of other chronic conditions<sup>[27-29]</sup>. The entire  
31  
32 population including nursing staff should pay more attention to the  
33  
34 management of blood pressure. Improving the lifestyle and monitoring the  
35  
36 blood pressure regularly are suggested to control the blood pressure in a  
37  
38 reasonable range. In order to prevent and control the occurrence of  
39  
40 hypertension and related diseases, drug treatment should be carried out  
41  
42 and therapeutic regimen should be adjusted in time if necessary.

43  
44  
45  
46  
47  
48  
49  
50  
51  
52  
53  
54  
55  
56 The guidelines recommend that antihypertensive drugs be considered  
57  
58 in patients with coronary heart disease and stroke, or 10 years of  
59  
60



1  
2  
3  
4 atherosclerotic cardiovascular disease risk 10% and blood pressure  
5  
6 130/80mmhg. If there is no coronary heart disease and stroke, and the  
7  
8 10-year risk of atherosclerotic cardiovascular disease is less than 10%,  
9  
10 the starting standard is 140/90mmhg. Therefore, it can be speculated that  
11  
12 according to the new guidelines, the number of nursing staff requiring  
13  
14 medication will increase, but not all of them need medication, and they  
15  
16 need to make a reasonable judgment based on their own conditions and  
17  
18 medical history.  
19  
20  
21  
22  
23

24  
25 Meanwhile, the ACC/AHA guidelines would require expansion of the  
26  
27 public health infrastructure necessary to manage the substantial increase  
28  
29 in the public health burden of hypertension in China. Different countries  
30  
31 have different epidemiological characteristics, genetic background,  
32  
33 disease control and economic levels. More evidence-based medical  
34  
35 evidence is needed to confirm whether the new guidelines are applicable  
36  
37 to China, how to determine the boundary value of hypertension, and  
38  
39 whether lowering blood pressure to 130/80mmhg can improve the  
40  
41 prognosis. The number of hypertension patients in China is huge and the  
42  
43 medical resources are relatively insufficient. The report of Chinese Center  
44  
45 for Disease Control and Prevention in 2013 pointed out that the number  
46  
47 of hypertension in China had risen to 330 million in 2010, and the direct  
48  
49 economic burden caused by hypertension reached 210.3 billion yuan in  
50  
51 2013, accounting for 6.61% of the total health cost in China. The number  
52  
53  
54  
55  
56  
57  
58  
59  
60

1  
2  
3  
4 of people with high blood pressure in China will rise by a large margin  
5  
6 according to the new guidelines, posing more severe challenges to  
7  
8 medical and health resources.  
9

### 10 11 ***Limitation*** 12

13  
14  
15 The large sample and high response rate make the data and results of this  
16  
17 study better representative. However, some limitations should be  
18  
19 considered when interpreting our data. First of all, this survey used the  
20  
21 average blood pressure measured 2 times on the same day, that may have  
22  
23 false positive diagnosis, resulting in overestimation of the prevalence rate.  
24  
25 Secondly, the blood pressure was measured by nurses themselves rather  
26  
27 than the staff trained unifiedly, but all nurses had received professional  
28  
29 knowledge of blood pressure measurement. In addition, a unified  
30  
31 description of the measurement methods and matters of attention were  
32  
33 carried out in the study, which could ensure the reliability of the  
34  
35 measurement results. Thirdly, because of the difference of blood pressure  
36  
37 measuring instruments, it may have some effect on the data, but the  
38  
39 sphygmomanometer had been tested and corrected. The blood pressure  
40  
41 measurement in the survey was carried out according to international  
42  
43 measurement and quality control regulations, which could guarantee the  
44  
45 reliability of the measurement results. Furthermore, the small proportion  
46  
47 of men and nurses over 55 years old in this study may have some  
48  
49 influence on the study results. Finally, the generalizability of our results  
50  
51  
52  
53  
54  
55  
56  
57  
58  
59  
60

1  
2  
3  
4 may be restricted due to the participants being recruited from only one  
5  
6 province in China. Future studies should be carried out to recruit  
7  
8 participants from other cities in China.  
9

### 10 11 ***Acknowledgment***

12  
13  
14  
15 This project was supported by the Hebei provincial Science and  
16  
17 Technology Department (162777166).  
18

19  
20  
21 ***Contributors:*** WC conceived the study, WC, BZ, YMH and YJZ designed  
22  
23 the study, drafted the manuscript, or critically revised the manuscript for  
24  
25 important intellectual content. J Li, XMC, XLY, AFZ, RFJ, RQZ, ALF,  
26  
27 YW, MJY, LT, SLC, JC and MZZ conducted the research and collected  
28  
29 data, J Liu, DF and MHX analyzed the data, WC, BZ, J Liu, YMH and DF  
30  
31 wrote the this article. All authors gave final approval of the version to be  
32  
33 published and are accountable for all aspects of the work in ensuring that  
34  
35 questions related to the accuracy or integrity of any part of the work are  
36  
37 appropriately investigated and resolved. WC is the corresponding author  
38  
39 and guarantor.  
40  
41  
42  
43  
44  
45  
46  
47

48  
49 ***Competing interests:*** All authors have completed the ICMJE uniform  
50  
51 disclosure form at [www.icmje.org/coi\\_disclosure.pdf](http://www.icmje.org/coi_disclosure.pdf) (available on  
52  
53 request from the corresponding author). No financial relationships with  
54  
55 any organisations that might have an interest in the submitted work in the  
56  
57 previous three years; no other relationships or activities that could appear  
58  
59  
60

1  
2  
3  
4 to have influenced the submitted work.  
5  
6

7 **Ethical approval:**The protocol was reviewed and approved by the  
8  
9  
10 Research Ethics Committee of the Second Hospital of Hebei Medical  
11  
12 University(No 2016225).  
13  
14

15  
16 **Transparency statement:** The guarantor (BZ) affirms that the manuscript  
17  
18 is an honest, accurate, and transparent account of the study being  
19  
20 reported; that no important aspects of the study have been omitted; and  
21  
22 that any discrepancies from the study as planned (and, if relevant,  
23  
24 registered) have been explained.  
25  
26  
27

28  
29  
30 **Data sharing:**No additional data available.  
31  
32

33  
34 **Funding:**This project was supported by the Hebei provincial Science and  
35  
36 Technology Department (162777166).  
37  
38

39  
40 **Exclusive licence:**The Corresponding Author has the right to grant on  
41  
42 behalf of all authors and does grant on behalf of all authors, a worldwide  
43  
44 licence to the Publishers and its licensees in perpetuity, in all forms,  
45  
46 formats and media (whether known now or created in the future), to i)  
47  
48 publish, reproduce, distribute, display and store the Contribution, ii)  
49  
50 translate the Contribution into other languages, create adaptations,  
51  
52 reprints, include within collections and create summaries, extracts and/or,  
53  
54 abstracts of the Contribution, iii) create any other derivative work(s)  
55  
56 based on the Contribution, iv) to exploit all subsidiary rights in the  
57  
58  
59  
60

1  
2  
3  
4 Contribution, v) the inclusion of electronic links from the Contribution to  
5  
6 third party material where-ever it may be located; and, vi) licence any  
7  
8 third party to do any or all of the above.  
9  
10  
11  
12  
13  
14  
15  
16  
17  
18  
19  
20

## References

- 21 [1] Agnoletti D, Valbusa F, Labat C, Gautier S, Mourad JJ, Benetos A. Evidence for a Prognostic Role of  
22 Orthostatic Hypertension on Survival in a Very Old Institutionalized Population. *Hypertension*.  
23 2016. 67(1): 191-196.  
24  
25 [2] Chen W, Gao R, Liu L, et al. China cardiovascular disease report 2015. *Chinese Circulation Journal*.  
26 2016. 31(06): 521-528.  
27  
28 [3] Lewington S, Lacey B, Clarke R, et al. The Burden of Hypertension and Associated Risk for  
29 Cardiovascular Mortality in China. *JAMA Intern Med*. 2016. 176(4): 524-532.  
30  
31 [4] Chen W, Gao R, Liu L, et al. China cardiovascular disease report 2017. *Chinese Circulation Journal*.  
32 2018. 33(01): 1-8.  
33  
34 [5] Qi SF, Zhang B, Wang HJ, et al. Prevalence of hypertension subtypes in 2011 and the trends from  
35 1991 to 2011 among Chinese adults. *J Epidemiol Community Health*. 2016. 70(5): 444-451.  
36  
37 [6] Liang Y, Liu R, Du S, Qiu C. Trends in incidence of hypertension in Chinese adults, 1991-2009: the  
38 China Health and Nutrition Survey. *Int J Cardiol*. 2014. 175(1): 96-101.  
39  
40 [7] Li D, Huang J, Tang L, Wang J, Jia H. Characteristics of Job Stressors, Fatigue and Change of Blood  
41 Pressure, Blood Glucose and Lipid among ICU NRISES. *Nurs J Chin PLA*. 2012. 29(07): 1-4.  
42  
43 [8] Lo SH, Lin LY, Hwang JS, Chang YY, Liao CS, Wang JD. Working the night shift causes increased  
44 vascular stress and delayed recovery in young women. *Chronobiol Int*. 2010. 27(7): 1454-1468.  
45  
46 [9] Whelton PK, Carey RM, Aronow WS, et al. 2017  
47 ACC/AHA/AAPA/ABC/ACPM/AGS/APhA/ASH/ASPC/NMA/PCNA Guideline for the Prevention,  
48 Detection, Evaluation, and Management of High Blood Pressure in Adults: A Report of the  
49 American College of Cardiology/American Heart Association Task Force on Clinical Practice  
50 Guidelines. *J Am Coll Cardiol*. 2017 .  
51  
52 [10] Kario K. Global Impact of 2017 American Heart Association/American College of Cardiology  
53 Hypertension GuidelinesA Perspective From Japan. *Circulation*. 2018. 137(6): 543-545.  
54  
55  
56  
57  
58  
59  
60

- 1  
2  
3 [11] Gurpreet SW, C.Venkata S.Ram. Global Impact of 2017 American Heart Association/American  
4 College of Cardiology Hypertension Guidelines A Perspective From India. *Circulation*. 2018. 137(6):  
5 549 – 550.  
6  
7  
8 [12] Wang J, Liu Ls. Global Impact of 2017 American College of Cardiology/American Heart Association  
9 Hypertension Guidelines A Perspective From China. *Circulation*. 2018. 137(6): 546-548.  
10  
11 [13] Wang Z, Chen Z, Zhang L, et al. Status of Hypertension in China: Results from the China  
12 Hypertension Survey, 2012-2015. *Circulation*. 2018 .  
13  
14 [14] Khera R, Lu Y, Lu J, et al. Impact of 2017 ACC/AHA guidelines on prevalence of hypertension and  
15 eligibility for antihypertensive treatment in United States and China: nationally representative  
16 cross sectional study. *BMJ*. 2018. 362: k2357.  
17  
18 [15] Li D, Zeng X, Huang Y, et al. Increased Risk of Hypertension in Young Adults in Southwest China:  
19 Impact of the 2017 ACC/AHA High Blood Pressure Guideline. *Curr Hypertens Rep*. 2019. 21(3): 21.  
20  
21 [16] Guo J, Zhu YC, Chen YP, Hu Y, Tang XW, Zhang B. The dynamics of hypertension prevalence,  
22 awareness, treatment, control and associated factors in Chinese adults: results from CHNS  
23 1991-2011. *J Hypertens*. 2015. 33(8): 1688-1696.  
24  
25 [17] Afridi HI, Talpur FN, Kazi TG, Brabazon D. Assessment of toxic elements in the samples of different  
26 cigarettes and their effect on the essential elemental status in the biological samples of Irish  
27 hypertensive consumers. *J Hum Hypertens*. 2015. 29(5): 309-315.  
28  
29 [18] Sun J, Buys NJ, Hills AP. Dietary pattern and its association with the prevalence of obesity,  
30 hypertension and other cardiovascular risk factors among Chinese older adults. *Int J Environ Res  
31 Public Health*. 2014. 11(4): 3956-3971.  
32  
33 [19] Ahn S, Zhao H, Smith ML, Ory MG, Phillips CD. BMI and lifestyle changes as correlates to changes  
34 in self-reported diagnosis of hypertension among older Chinese adults. *J Am Soc Hypertens*. 2011.  
35 5(1): 21-30.  
36  
37 [20] Li S, Yu J, Zhang L, Zhan Y, Zhang F, Hu D. Hypertension and cardiovascular risk evaluation of  
38 Chinese cardiovascular physicians. *Chin J Cardiol*. 2011. 39(3): 254-258.  
39  
40 [21] Liu M, Wang D, Hao Y, Shen M, Xie D. Risk Factors of Hypertension in Medical Staff in a Three-A  
41 Level Hospital in Zhengzhou. *Evaluation and analysis of drug-use in hospitals of China*. 2015.  
42 15(02): 267-269.  
43  
44 [22] Commission CHaFP. Report on nutrition and chronic diseases in China (2015). 2015. Beijing.  
45 People's Medical Publishing House. 33-50.  
46  
47 [23] Li Y, Yang L, Wang L, et al. Burden of hypertension in China: A nationally representative survey of  
48 174,621 adults. *Int J Cardiol*. 2017. 227: 516-523.  
49  
50 [24] Lu J, Lu Y, Wang X, et al. Prevalence, awareness, treatment, and control of hypertension in China:  
51 data from 1 • 7 million adults in a population-based screening study (China PEACE Million Persons  
52 Project). *Lancet*. 2017. 390(10112): 2549-2558.  
53  
54  
55  
56  
57  
58  
59  
60

- 1  
2  
3 [25] Lee, Ji Hyun, et al. "Blood Pressure Control and Cardiovascular Outcomes: Real-world Implications  
4 of the 2017 ACC/AHA Hypertension Guideline." *Scientific reports* 8.1 (2018): 13155.  
5  
6  
7 [26] Watkins, David A. "Implications of the 2017 ACC/AHA Hypertension Guideline for Public Health in  
8 Nepal." *JAMA network open* 1.3 (2018): e180778-e180778.  
9  
10 [27] Lemstra M, Alsabbagh MW. Proportion and risk indicators of nonadherence to antihypertensive  
11 therapy: a meta-analysis. *Patient Prefer Adherence*. 2014. 8: 211-218.  
12  
13 [28] Wang W, Lau Y, Loo A, Chow A, Thompson DR. Medication adherence and its associated factors  
14 among Chinese community-dwelling older adults with hypertension. *Heart Lung*. 2014. 43(4):  
15 278-283.  
16  
17 [29] Law MR, Morris JK, Wald NJ. Use of blood pressure lowering drugs in the prevention of  
18 cardiovascular disease: meta-analysis of 147 randomised trials in the context of expectations from  
19 prospective epidemiological studies. *BMJ*. 2009. 338: b1665.  
20  
21  
22  
23  
24  
25  
26  
27  
28  
29  
30  
31  
32  
33  
34  
35  
36  
37  
38  
39  
40  
41  
42  
43  
44  
45  
46  
47  
48  
49  
50  
51  
52  
53  
54  
55  
56  
57  
58  
59  
60

STROBE Statement—Checklist of items that should be included in reports of *cross-sectional studies*

|                           | Item No | Recommendation                                                                                                                                                                                    |                                               |
|---------------------------|---------|---------------------------------------------------------------------------------------------------------------------------------------------------------------------------------------------------|-----------------------------------------------|
| <b>Title and abstract</b> | 1       | (a) Indicate the study's design with a commonly used term in the title or the abstract                                                                                                            | Title and the 2st segment of Page 4           |
|                           |         | (b) Provide in the abstract an informative and balanced summary of what was done and what was found                                                                                               | Page 4 and Page 5                             |
| <b>Introduction</b>       |         |                                                                                                                                                                                                   |                                               |
| Background/rationale      | 2       | Explain the scientific background and rationale for the investigation being reported                                                                                                              | the 2nd segment and the 3rd segment of Page 6 |
| Objectives                | 3       | State specific objectives, including any prespecified hypotheses                                                                                                                                  | the 1st segment of Page 7                     |
| <b>Methods</b>            |         |                                                                                                                                                                                                   |                                               |
| Study design              | 4       | Present key elements of study design early in the paper                                                                                                                                           | Page 7 and page 8                             |
| Setting                   | 5       | Describe the setting, locations, and relevant dates, including periods of recruitment, exposure, follow-up, and data collection                                                                   | Page 7 and Page 8                             |
| Participants              | 6       | (a) Give the eligibility criteria, and the sources and methods of selection of participants                                                                                                       | Page 9                                        |
| Variables                 | 7       | Clearly define all outcomes, exposures, predictors, potential confounders, and effect modifiers. Give diagnostic criteria, if applicable                                                          | Page 12                                       |
| Data sources/measurement  | 8*      | For each variable of interest, give sources of data and details of methods of assessment (measurement). Describe comparability of assessment methods if there is more than one group              | Page 8 and page 10                            |
| Bias                      | 9       | Describe any efforts to address potential sources of bias                                                                                                                                         | Page 10 and page 11                           |
| Study size                | 10      | Explain how the study size was arrived at                                                                                                                                                         | Page 8                                        |
| Quantitative variables    | 11      | Explain how quantitative variables were handled in the analyses. If applicable, describe which groupings were chosen and why                                                                      | the first two segments of Page 13             |
| Statistical methods       | 12      | (a) Describe all statistical methods, including those used to control for confounding                                                                                                             | Page 13                                       |
|                           |         | (b) Describe any methods used to examine subgroups and interactions                                                                                                                               | N/A                                           |
|                           |         | (c) Explain how missing data were addressed                                                                                                                                                       | the 3rd sentence of Page 8                    |
|                           |         | (d) If applicable, describe analytical methods taking account of sampling strategy                                                                                                                | N/A                                           |
|                           |         | (e) Describe any sensitivity analyses                                                                                                                                                             | N/A                                           |
| <b>Results</b>            |         |                                                                                                                                                                                                   |                                               |
| Participants              | 13*     | (a) Report numbers of individuals at each stage of study—eg numbers potentially eligible, examined for eligibility, confirmed eligible, included in the study, completing follow-up, and analysed | N/A                                           |
|                           |         | (b) Give reasons for non-participation at each stage                                                                                                                                              | N/A                                           |
|                           |         | (c) Consider use of a flow diagram                                                                                                                                                                | N/A                                           |
| Descriptive               | 14*     | (a) Give characteristics of study participants (eg demographic,                                                                                                                                   | Table 1                                       |



|    |                          |     |                                                                   |                              |
|----|--------------------------|-----|-------------------------------------------------------------------|------------------------------|
| 1  |                          |     |                                                                   |                              |
| 2  | data                     |     | clinical, social) and information on exposures and potential      |                              |
| 3  |                          |     | confounders                                                       |                              |
| 4  |                          |     |                                                                   |                              |
| 5  |                          |     | (b) Indicate number of participants with missing data for each    | Table 1                      |
| 6  |                          |     | variable of interest                                              |                              |
| 7  | Outcome data             | 15* | Report numbers of outcome events or summary measures              | Table 2 and Table 3          |
| 8  | Main results             | 16  | (a) Give unadjusted estimates and, if applicable, confounder-     | Table 2 and Table 3          |
| 9  |                          |     | adjusted estimates and their precision (eg, 95% confidence        |                              |
| 10 |                          |     | interval). Make clear which confounders were adjusted for and     |                              |
| 11 |                          |     | why they were included                                            |                              |
| 12 |                          |     |                                                                   |                              |
| 13 |                          |     | (b) Report category boundaries when continuous variables          | Table 1 、 Table 3、 Table4    |
| 14 |                          |     | were categorized                                                  |                              |
| 15 |                          |     |                                                                   |                              |
| 16 |                          |     | (c) If relevant, consider translating estimates of relative risk  | N/A                          |
| 17 |                          |     | into absolute risk for a meaningful time period                   |                              |
| 18 | Other analyses           | 17  | Report other analyses done—eg analyses of subgroups and           | Table 5                      |
| 19 |                          |     | interactions, and sensitivity analyses                            |                              |
| 20 |                          |     |                                                                   |                              |
| 21 | <b>Discussion</b>        |     |                                                                   |                              |
| 22 | Key results              | 18  | Summarise key results with reference to study objectives          | Page 25 and Page 26          |
| 23 | Limitations              | 19  | Discuss limitations of the study, taking into account sources of  | Page 30                      |
| 24 |                          |     | potential bias or imprecision. Discuss both direction and         |                              |
| 25 |                          |     | magnitude of any potential bias                                   |                              |
| 26 |                          |     |                                                                   |                              |
| 27 | Interpretation           | 20  | Give a cautious overall interpretation of results considering     | Page 25 and Page 26          |
| 28 |                          |     | objectives, limitations, multiplicity of analyses, results from   |                              |
| 29 |                          |     | similar studies, and other relevant evidence                      |                              |
| 30 |                          |     |                                                                   |                              |
| 31 | Generalisability         | 21  | Discuss the generalisability (external validity) of the study     | the last sentence of Page 30 |
| 32 |                          |     | results                                                           |                              |
| 33 |                          |     |                                                                   |                              |
| 34 | <b>Other information</b> |     |                                                                   |                              |
| 35 | Funding                  | 22  | Give the source of funding and the role of the funders for the    | Page 32                      |
| 36 |                          |     | present study and, if applicable, for the original study on which |                              |
| 37 |                          |     | the present article is based                                      |                              |
| 38 |                          |     |                                                                   |                              |

\*Give information separately for exposed and unexposed groups.

**Note:** An Explanation and Elaboration article discusses each checklist item and gives methodological background and published examples of transparent reporting. The STROBE checklist is best used in conjunction with this article (freely available on the Web sites of PLoS Medicine at <http://www.plosmedicine.org/>, Annals of Internal Medicine at <http://www.annals.org/>, and Epidemiology at <http://www.epidem.com/>). Information on the STROBE Initiative is available at [www.strobe-statement.org](http://www.strobe-statement.org).

# BMJ Open

## The hypertension prevalence alteration in 92815 nurses based on the new standard by 2017 ACC/AHA hypertension guideline: an observational cross-sectional study from China

|                                 |                                                                                                                                                                                                                                                                                                                                                                                                                                                                                                                                                                                                                                                                                                                                                                                                                                                                                                                                                                                                                                                                                                                                                                                                                                                                                                                                                                                                       |
|---------------------------------|-------------------------------------------------------------------------------------------------------------------------------------------------------------------------------------------------------------------------------------------------------------------------------------------------------------------------------------------------------------------------------------------------------------------------------------------------------------------------------------------------------------------------------------------------------------------------------------------------------------------------------------------------------------------------------------------------------------------------------------------------------------------------------------------------------------------------------------------------------------------------------------------------------------------------------------------------------------------------------------------------------------------------------------------------------------------------------------------------------------------------------------------------------------------------------------------------------------------------------------------------------------------------------------------------------------------------------------------------------------------------------------------------------|
| Journal:                        | <i>BMJ Open</i>                                                                                                                                                                                                                                                                                                                                                                                                                                                                                                                                                                                                                                                                                                                                                                                                                                                                                                                                                                                                                                                                                                                                                                                                                                                                                                                                                                                       |
| Manuscript ID                   | bmjopen-2018-027201.R2                                                                                                                                                                                                                                                                                                                                                                                                                                                                                                                                                                                                                                                                                                                                                                                                                                                                                                                                                                                                                                                                                                                                                                                                                                                                                                                                                                                |
| Article Type:                   | Research                                                                                                                                                                                                                                                                                                                                                                                                                                                                                                                                                                                                                                                                                                                                                                                                                                                                                                                                                                                                                                                                                                                                                                                                                                                                                                                                                                                              |
| Date Submitted by the Author:   | 17-Jul-2019                                                                                                                                                                                                                                                                                                                                                                                                                                                                                                                                                                                                                                                                                                                                                                                                                                                                                                                                                                                                                                                                                                                                                                                                                                                                                                                                                                                           |
| Complete List of Authors:       | <p>zhao, bin; Second Hospital of Hebei Medical University<br/> li, jing; Second Hospital of Hebei Medical University<br/> liu, jie; Second Hospital of Hebei Medical University<br/> hao, yuming; Second Hospital of Hebei Medical University<br/> zhen, yanjie; Second Hospital of Hebei Medical University<br/> feng, di; Second Hospital of Hebei Medical University<br/> xu, menghui; Second Hospital of Hebei Medical University<br/> chen, ximin; Second hospital of Baoding<br/> yang, xiulan; Tangshan Gongren Hospital, nursing department<br/> zuo, aifang; Handan central hospital , nursing department<br/> jia, rufu; Cangzhou central hospital, neurology hospital<br/> zhang, ruiqin; The second affiliated hospital of Xingtai medical college, nursing department<br/> fan, ailing; The people's hospital of Langfang city, nursing department<br/> wang, yun; The first hospital of Qinhuangdao, nursing department<br/> yuan, meijin; The first affiliated hospital of Hebei north university, nursing department<br/> tong, li; Harrison international peace hospital, nursing department<br/> chen, shuling; Chengde central hospital, nursing department<br/> cui, jing; Dingzhou maternal and child health care hospital, nursing department<br/> zhao, meizhu; The first hospital of Xinji, nursing department<br/> cui, wei; Second Hospital of Hebei Medical University</p> |
| <b>Primary Subject Heading</b>: | Cardiovascular medicine                                                                                                                                                                                                                                                                                                                                                                                                                                                                                                                                                                                                                                                                                                                                                                                                                                                                                                                                                                                                                                                                                                                                                                                                                                                                                                                                                                               |
| Secondary Subject Heading:      | Epidemiology, Public health                                                                                                                                                                                                                                                                                                                                                                                                                                                                                                                                                                                                                                                                                                                                                                                                                                                                                                                                                                                                                                                                                                                                                                                                                                                                                                                                                                           |
| Keywords:                       | Hypertension < CARDIOLOGY, nurses, prevalence, guideline                                                                                                                                                                                                                                                                                                                                                                                                                                                                                                                                                                                                                                                                                                                                                                                                                                                                                                                                                                                                                                                                                                                                                                                                                                                                                                                                              |
|                                 |                                                                                                                                                                                                                                                                                                                                                                                                                                                                                                                                                                                                                                                                                                                                                                                                                                                                                                                                                                                                                                                                                                                                                                                                                                                                                                                                                                                                       |

SCHOLARONE™  
Manuscripts

1  
2  
3  
4  
5  
6  
7  
8  
9  
10  
11  
12  
13  
14  
15  
16  
17  
18  
19  
20  
21  
22  
23  
24  
25  
26  
27  
28  
29  
30  
31  
32  
33  
34  
35  
36  
37  
38  
39  
40  
41  
42  
43  
44  
45  
46  
47  
48  
49  
50  
51  
52  
53  
54  
55  
56  
57  
58  
59  
60

1  
2  
3  
4 **The hypertension prevalence alteration in 92815 nurses based on the**  
5 **new standard by 2017 ACC/AHA hypertension guideline: an**  
6 **observational cross-sectional study from China**  
7  
8  
9  
10  
11  
12  
13

14 Bin Zhao, Jing Li, Jie Liu, Yuming Hao, Yanjie Zhen, Di Feng, Menghui Xu, Ximin  
15 Chen, Xiulan Yang, Aifang Zuo, Rufu Jia, Ruiqin Zhang, Ailing Fan, Yun Wang,  
16 Meijin Yuan, Li Tong, Shuling Chen, Jing Cui, Meizhu Zhao, Wei Cui  
17  
18  
19

20  
21 Bin Zhao, RN, Professor, Head of the nursing department, The Second Hospital of  
22 Hebei medical university, Shijiazhuang, China;  
23

24  
25 Jing Li, RN, nursing department, The second hospital of Hebei medical university,  
26 Shijiazhuang, China;  
27

28  
29 Jie Liu, nursing department, RN, The second hospital of Hebei medical university,  
30 Shijiazhuang, China;  
31

32  
33 Yuming Hao, MD, Professor, department of cardiology, The second hospital of Hebei  
34 medical university, Shijiazhuang, China  
35

36  
37 Yanjie Zhen, RN, Head nurse, department of cardiology, The second hospital of  
38 Hebei medical university, Shijiazhuang, China;  
39

40  
41 Di Feng, RN, nursing department, The second hospital of Hebei medical university,  
42 Shijiazhuang, China;  
43

44  
45 Menghui Xu, RN, nursing department, The second hospital of Hebei medical  
46 university, Shijiazhuang, China;  
47

48  
49 Ximin Chen, RN, Head of the nursing department, The second hospital of Baoding,  
50 Baoding, China;  
51

52  
53 Xiulan Yang, RN, Head of the nursing department, Tangshan gongren hospital,  
54 Tangshan, China;  
55

56  
57 Aifang Zuo, RN, Head of the nursing department, Handan central hospital, Handan,  
58 China;  
59  
60

1  
2  
3 Rufu Jia, RN, Vice president of hospital, Cangzhou central hospital, Cangzhou,  
4 China;

5  
6  
7 Ruiqin Zhang, RN, Head of the nursing department, The Second affiliated hospital of  
8 Xingtai medical college, Xingtai, China;

9  
10  
11 Ailing Fan, RN, Head of the nursing department, The people's hospital of Langfang  
12 city, Langfang, China;

13  
14  
15 Yun Wang, RN, Head of the nursing department, The first hospital of Qinhuangdao,  
16 Qinhuangdao, China;

17  
18  
19 Meijin Yuan, RN, Head of the nursing department, The first affiliated hospital of  
20 Hebei north university, Zhangjiakou, China;

21  
22  
23 Li Tong, RN, Head of the nursing department, Harrison international peace hospital,  
24 Hengshui, China;

25  
26  
27 Shuling Chen, RN, Head of the nursing department, Chengde central hospital,  
28 Chengde, China;

29  
30  
31 Jing Cui, RN, Head of the nursing department, Dingzhou maternal and child health  
32 care hospital, Dingzhou, China;

33  
34  
35 Meizhu Zhao, RN, Head of the nursing department, The first hospital of Xinji, Xinji,  
36 China;

37  
38  
39 Wei Cui, corresponding author, MD, department of cardiology, The second hospital  
40 of Hebei medical university, 215 heping west road, Shijiazhuang, China,  
41 cuiwei21c@163.com, 860311-66002133  
42  
43  
44

45  
46 **Key words: hypertension,nurses,prevalence,guideline**

47  
48 **Word count:4129**

49  
50  
51 **Abstract**

52  
53  
54 **Objectives**—This study aims to elucidate the status of hypertension and  
55 analyze the hypertension changes in prevalence, awareness, treatment and  
56 control rate among the portion of Chinese nursing staffs based on the  
57  
58  
59  
60

1  
2  
3  
4 2017 American College of Cardiology (ACC) /American Heart  
5  
6 Association (AHA) High Blood Pressure Guideline and the 2010 Chinese  
7  
8 guideline for the management of hypertension.  
9  
10

11  
12 **Design**—cross-sectional study.  
13  
14

15  
16 **Setting**—512 medical institutions in 13 cities in Hebei province.  
17

18  
19 **Participants**—The candidate of registered nurses from 512 medical  
20  
21 institutions in 13 cities in Hebei province (n=143772) were invited to  
22  
23 participate in the survey and few of them who refused to participate were  
24  
25 excluded from the research group. Based on the reasons that 93603  
26  
27 incumbent nurses at the age of 18-65 accepted to the survey and  
28  
29 submitted questionnaires online. Undoubtedly, a response rate of 65.11%  
30  
31 was achieved. After excluding 788 individuals with incomplete  
32  
33 information in the questionnaires, 92815 participants were included in the  
34  
35 final analysis.  
36  
37  
38  
39  
40  
41

42  
43 **Main outcome measures**—The prevalence, awareness, treatment and  
44  
45 control rates of hypertension.  
46  
47

48  
49 **Results**—92815 participants were included in the final analysis,  
50  
51 among which consisted of 3,677 men (3.96%) and 8,9138 women  
52  
53 (96.04%). The mean age of participants was 31.65 (SD=7.47) years.  
54  
55

56 We demonstrated that 26,875 nursing staffs were diagnosed as  
57  
58 hypertension according to the new standard by 2017 ACC/AHA guideline,  
59  
60

1  
2  
3  
4 more than 20,551 cases compared with the previous threshold upon the  
5  
6 2010 Chinese guideline. The prevalence of hypertension among nursing  
7  
8 staffs was 28.96% in the context of the 2017 ACC/AHA guideline, 3.25  
9  
10 times higher than that (6.81%) evaluated by the criteria of the 2010  
11  
12 Chinese guideline. However, the awareness, treatment and control rate  
13  
14 (13.50%, 10.73%, 0.81%) were 3.25, 3.22 and 17.48 times lower than  
15  
16 those (57.37%, 45.30%, 14.97%) based on the 2010 Chinese guideline,  
17  
18 respectively.  
19  
20  
21  
22  
23  
24

25 **Conclusions**—This research illustrated that it was crucial for the  
26  
27 improvement in the awareness rate, drug treatment rate and control rate of  
28  
29 hypertension among nurses. Meanwhile, according to the 2017  
30  
31 ACC/AHA guideline, the prevalence of hypertension in China will  
32  
33 increase significantly, which poses a more severe challenge to the  
34  
35 management of hypertension in China.  
36  
37  
38  
39  
40

### 41 ***Strengths and limitations of this study***

42  
43  
44 1.This study described the current status of the hypertension in  
45  
46 nurses according to the 2010 Chinese guideline and the 2017  
47  
48 ACC/AHA guideline.  
49

50  
51  
52 2.This study had a large sample size, covering 13 regions, and  
53  
54 described the prevalence and distribution of hypertension in different  
55  
56 population groups.  
57

58  
59  
60 3.Not all the relationships between hypertension and specific factors

1  
2  
3  
4 identified in this study were investigated.  
5  
6

### 7 ***Introduction***

8  
9 With the rapid development of society and economy, the changes of  
10 lifestyle and the aging of the population, hypertension has become one of  
11 the most important public health issues in the world. Its complications are  
12 associated with high morbidity and mortality, as well as high rate of  
13 consumption of medical resources [1]. The direct economic burden caused  
14 by hypertension in China in 2013 amounted to 210.3 billion yuan,  
15 accounting for 6.61% of total expenditure on health of China<sup>[2-4]</sup>.  
16 According to the China Health and Nutrition Survey (CHNS) data from  
17 1991 to 2011, the adjusted prevalence rate of hypertension in Chinese  
18 over 18 years old increased from 15.6% to 20.9% , the prevalence rate of  
19 hypertension increased<sup>[5]</sup>, however, the awareness, treatment and control  
20 rates were still low<sup>[6]</sup>.  
21  
22  
23  
24  
25  
26  
27  
28  
29  
30  
31  
32  
33  
34  
35  
36  
37  
38  
39

40 The 2017 American Heart Association/American College of  
41 Cardiology (AHA/ACC) guideline for the prevention, detection,  
42 evaluation, and management of high blood pressure (BP) in adults has  
43 been recently released. A significant transformation in the guideline is the  
44 shift in the definition of hypertension, from systolic blood pressure (SBP)  
45  $\geq 140$  mm Hg or diastolic blood pressure (DBP)  $\geq 90$  mm Hg to systolic  
46 blood pressure (SBP)  $\geq 130$  mm Hg or diastolic blood pressure(DBP)  $\geq$   
47 80 mm Hg. According to the 2017 AHA/ACC guideline, the prevalence  
48  
49  
50  
51  
52  
53  
54  
55  
56  
57  
58  
59  
60



1  
2  
3  
4 rate of hypertension increased from 31.9% to 45.6% in the United  
5  
6 States<sup>[7]</sup>.

7  
8  
9 The 2017 ACC/AHA guideline may bring critical effects on the  
10  
11 hypertension status in different regions worldwide<sup>[8-11]</sup>. Recently, more  
12  
13 and more researchers focused on the issues about the potential impacts of  
14  
15 the updated guideline on Chinese population. A nationally representative  
16  
17 cross sectional study examined the hypertension prevalence rate  
18  
19 according to the new guideline and found an absolute increase of  
20  
21 17.0% among adults aged 45 to 75 years in China<sup>[12]</sup>. Additionally, a  
22  
23 survey examined the effects of the new guideline in Southwest China and  
24  
25 found the prevalence of hypertension was nearly twice than the Chinese  
26  
27 hypertension guideline<sup>[13]</sup>. Findings from previous studies were mainly  
28  
29 focused on the increase in the prevalence of hypertension  
30  
31 in Chinese general population under the new guideline, but it was still  
32  
33 largely unclear that how the new guideline exerted influence on the  
34  
35 hypertension status in different social communities in China. And the  
36  
37 nursing staff, as a specially class of professional group, whose work was  
38  
39 of high intensity, characterized with high stress level and requires  
40  
41 frequent rotating shifts, their blood pressure level should be paid more  
42  
43 attention to<sup>[14, 15]</sup>. This study was a cross-sectional survey based on a large  
44  
45 number of nursing staffs. The purpose was to analyze the alteration of  
46  
47 prevalence, awareness, treatment and control rates of hypertension in  
48  
49  
50  
51  
52  
53  
54  
55  
56  
57  
58  
59  
60

1  
2  
3  
4 Chinese nursing staffs based on the 2017 ACC/AHA guideline and the  
5  
6 2010 Chinese guideline, as well as the characteristics of the newly  
7  
8 diagnosed hypertension population.  
9  
10

## 11 **METHODS**

### 12 **Participants and data collection**

13  
14  
15  
16  
17 This cross-sectional study was conducted from October 2016 to February  
18  
19 2017, using general survey design. The candidate of registered nurses  
20  
21 from 512 medical institutions in 13 cities in Hebei province(n=143772)  
22  
23 were invited to participate in the survey and few of them who refused to  
24  
25 participate were excluded from the research group. Based on the reasons  
26  
27 that who accepted to the survey and submitted questionnaires online, we  
28  
29 collected 93,603 incumbent nurses at the age of 18-65. Undoubtedly a  
30  
31 response rate of 65.11% was achieved. After excluding 788 individuals  
32  
33 with incomplete information in the questionnaires, 92815 participants  
34  
35 were included in the final analysis.  
36  
37  
38  
39  
40  
41  
42

43 Electronic folders were distributed to the Nursing Quality Control  
44  
45 Center (NQCC) of each city through NQCC of Hebei Province. The  
46  
47 folder contained three documents: the link of electronic questionnaire(SO  
48  
49 JUMP), a document on blood pressure measurement precautions and an  
50  
51 investigation notice. Upon receiving the folder, the contact person of each  
52  
53 NQCC sent it to the nursing department of all medical institutions in the  
54  
55 different cities Then the nursing department sent it to the head managers  
56  
57  
58  
59  
60

1  
2  
3  
4 of departments, who organized the nurses to fill in the questionnaire  
5  
6 online. A researcher was arranged to report the response rate to  
7  
8 the NQCC of each city every day. The  
9  
10 questionnaire content mainly involves: (1) Demographic characteristic:  
11  
12 hospital name, hospital grade, department, name, age, gender, height,  
13  
14 weight, etc. (2) Systolic blood pressure, diastolic blood pressure. (3) The  
15  
16 risk factors associated with hypertension: monthly night shift frequency,  
17  
18 years of hyperlipidemia, years of diabetes, years of  
19  
20 hypertension, educational status, marital status, menstruation condition,  
21  
22 reproductive history, history of abortion, whether received hormone  
23  
24 replacement therapy, smoking habit, alcohol drinking, physical exercise,  
25  
26 family history of hypertension, etc<sup>[16-19]</sup>.

### 27 28 29 30 31 32 33 34 35 **Ethical considerations**

36  
37 The study was reviewed and approved by the Research Ethics Committee  
38  
39 of the Second Hospital of Hebei Medical University (No. 2016225).  
40  
41 Consent was implied by completion of the questionnaire. All participants  
42  
43 were voluntary and had right to participate or refuse without any reason.  
44  
45 To protect the privacy of respondents, electronic data were saved in  
46  
47 secured computer of the hospital with restricted access.  
48  
49  
50  
51

### 52 53 ***Participants and public involvement***

54  
55 In this study, self-report was adopted, and all the participants were nurses  
56  
57 who understood the effect of blood pressure measurement by themselves.  
58  
59  
60

1  
2  
3  
4 After receiving the notification of the blood pressure survey, all  
5  
6 participants filled in and submitted relevant data online, and those who  
7  
8 did not accept could refuse to participate. Although the participants or the  
9  
10 public were not formally involved in the design and conduct of the study,  
11  
12 the questionnaire used for data collection and the specific assessments  
13  
14 conduction were developed based on previous experiences in other  
15  
16 surveys and expert opinions. The research data would be sent to  
17  
18  
19  
20  
21  
22  
23  
24  
25  
26  
27  
28  
29  
30  
31  
32  
33  
34  
35  
36  
37  
38  
39  
40  
41  
42  
43  
44  
45  
46  
47  
48  
49  
50  
51  
52  
53  
54  
55  
56  
57  
58  
59  
60  
Municipal Nursing Quality and Control Center in Hebei Province.

### ***Measurement***

Blood pressure measurement and data reporting: the nursing staff measured blood pressure by themselves and reported data through the network. Although nurses mastered the blood pressure measurement method generally, the researchers standardized the method of blood pressure measurement and gave the relevant attention in order to reduce measurement bias as much as possible. In order to ensure the accuracy of the report and blood pressure data, a series of measures were adopted for quality controlling. Firstly, our research group established a 3-level supervision mechanism which contained Nursing Quality Control Center, nursing departments and head nurses of hospitals at all levels. Each day during the investigations, research group members exported data from information platform to conduct data analysis, calculated the number of staffs who had finished the questionnaire in each hospital, then feed it

1  
2  
3  
4 back it to their municipal quality control centers for controlling  
5  
6 researching progress. Additionally, each questionnaire was checked and  
7  
8 verified by professional quality investigators. After that, the results of  
9  
10 verified data were sent to municipal quality control centers for  
11  
12 complementing the missing items and correcting mistakes. What is more,  
13  
14 we also attached important cautions while releasing announcement of  
15  
16 taking blood pressure.  
17  
18  
19  
20  
21

22 Blood pressure measurements: Chose a regular calibration of the  
23  
24 mercury sphygmomanometer or validated electronic sphygmomanometer.  
25  
26 Used the standard specification cuff with air bag which is 22cm in length  
27  
28 and 12cm in width. The obese individuals or individuals with large arm  
29  
30 circumference used a large size balloon cuff, and the upper arm was  
31  
32 wrapped up at least 80% by air bag. Each participant was asked to take a  
33  
34 rest at least for 5 minutes, any vigorous activity was avoided and  
35  
36 cigarettes, beverage containing caffeine like tea and coffee were  
37  
38 forbidden within 30 minutes, and empty the bladder before the blood  
39  
40 pressure measurement. Blood pressure was measured in a sitting position,  
41  
42 the right upper arm should be exposed and the cuff should be kept at the  
43  
44 same level as heart. Each participant was measured three times with an  
45  
46 interval time of 1 min interval and the average of the last two readings  
47  
48 was used for analysis.  
49  
50  
51  
52  
53  
54  
55  
56  
57

### 58 ***Definitions***

59  
60

1  
2  
3  
4 Hypertension was defined as systolic BP (SBP)  $\geq 140$  mm Hg, or diastolic  
5  
6 BP (DBP)  $\geq 90$  mm Hg, and/or self-reported having an existing diagnosis  
7  
8 of hypertension in accordance with the 2010 Chinese guideline. The new  
9  
10 classification designates SBP  $\geq 130$  mm Hg or DBP  $\geq 80$  mm Hg and/or  
11  
12 self-reported having an existing diagnosis of hypertension as  
13  
14 hypertension according to the 2017 ACC/AHA guideline.  
15  
16  
17  
18

19 The ratio of hypertension to total population was the prevalence of  
20  
21 hypertension. Awareness of hypertension was defined as any  
22  
23 self-reported previous diagnosis of hypertension by a health care  
24  
25 professional physician, treatment was self-reported use of a  
26  
27 prescription medication for hypertension management within the 2  
28  
29 weeks at the time of the interview, control referred to pharmacologic  
30  
31 treatment of hypertension associated with SBP  $< 140$  mm Hg and  
32  
33 DBP  $< 90$  mm Hg during the past 2 weeks.  
34  
35  
36  
37  
38  
39

40 In addition, the study also estimated the prevalence (SBP  $\geq 130$  or  
41  
42 DBP  $\geq 80$  mm Hg) and control rate (SBP  $< 130$  and DBP  $< 80$  mm Hg)  
43  
44 of hypertension according to the 2017 ACC / AHA guideline.  
45  
46  
47

48 Response rate was defined as the number of nurses responding to  
49  
50 the questionnaire online divided by the total number of registered  
51  
52 nurses in Hebei Province.  
53  
54

### 55 ***Statistical analysis***

56  
57  
58 All variables were statistically described, the normality of the  
59  
60

1  
2  
3  
4 continuous variables was assessed, variables with a normal  
5  
6 distribution were presented as mean±standard deviation, variables  
7  
8 with a skewed distribution were reported with medians and  
9  
10 interquartile ranges (IQRs), and categorical data was presented by  
11  
12 the percentages description. The prevalence of hypertension as well  
13  
14 as awareness, treatment, and control rates of hypertension among  
15  
16 hypertensive participants were calculated according to the two  
17  
18 guidelines. In addition, we reported the prevalence for each of the  
19  
20 background characteristics of the study. Then we calculated the  
21  
22 distribution of the population across 5 groups including those who  
23  
24 didn't have an existing diagnosis of hypertension with SBP/DBP  
25  
26 <120/<80 mm Hg, 120 to 129/<80 mm Hg, 130 to 139/80 to 89 mm  
27  
28 Hg, and  $\geq$ 140/90 mm Hg, and those who had an existing diagnosis of  
29  
30 hypertension. To investigate the factors associated with newly diagnosed  
31  
32 hypertension, the possible risk factors (gender, age, BMI, years of  
33  
34 hyperlipidemia, years of diabetes, smoking, alcohol drinking, family  
35  
36 history of hypertension) were incorporated into a multiple logistic  
37  
38 regression analysis. Analyses were performed by using SPSS V.21.0  
39  
40 software. A two-sided P value<0.05 was considered statistically  
41  
42 significant.  
43  
44  
45  
46  
47  
48  
49  
50  
51  
52  
53  
54

## 55 ***Results***

### 56 **Demographic characteristics**

Totally, 93,603 participants from 512 medical institutions in 13 cities were enrolled in this study, accounting for 65.11% of the total number of registered nurses in Hebei province. The main reason for non-response might be that some invited nurses have retired but have not logged out of the registration system, being on leave including maternity leave, study leave and other reasons during the period of data collection or refusing to participate.

After excluding 788 individuals with incomplete questionnaires, information in the 92,815 participants were included in the final analysis, among which consisted of 3,677 men (3.96%) and 89,138 women (96.04%). The median (IQR) age of participants was 30 (26-35) years (age range: 18–65 years). Our sample contained more people aged 35 years and younger (76.59%; table 1). Hypertension levels in different groups were shown in Table 1. With the increase of BMI, years of diabetes and years of hyperlipidemia, the blood pressure presented increasing trend.

**Table 1 Characteristics of study participants (N=92815)**

| Variable | N     | Percentage | SBP                 | DBP         |
|----------|-------|------------|---------------------|-------------|
|          |       | (%)        | Median(IQR)/mean±SD | Median(IQR) |
| Overall  | 92815 | 100        | 110(102-120)        | 70(64-80)   |
| Gender   |       |            |                     |             |
| Female   | 89138 | 96.04      | 110(101-120)        | 70(63-80)   |
| Male     | 3677  | 3.96       | 123(120-130)        | 80(75-85)   |
| Age,y*   |       |            |                     |             |



|    |                          |       |       |               |           |
|----|--------------------------|-------|-------|---------------|-----------|
| 1  |                          |       |       |               |           |
| 2  |                          |       |       |               |           |
| 3  |                          |       |       |               |           |
| 4  | 18-25                    | 17289 | 18.63 | 110(102-120)  | 70(63-78) |
| 5  |                          |       |       |               |           |
| 6  | 26-35                    | 53799 | 57.96 | 110(100-120)  | 70(62-78) |
| 7  |                          |       |       |               |           |
| 8  | 36-45                    | 14989 | 16.15 | 110(105-120)  | 70(65-80) |
| 9  |                          |       |       |               |           |
| 10 | 46-55                    | 6376  | 6.87  | 120(110-130)  | 80(70-85) |
| 11 |                          |       |       |               |           |
| 12 | 56-65                    | 250   | 0.27  | 130(120-135)  | 80(75-86) |
| 13 |                          |       |       |               |           |
| 14 | Missing data             | 112   | 0.12  | -             | -         |
| 15 |                          |       |       |               |           |
| 16 | BMI,kg/m <sup>2</sup> *a |       |       |               |           |
| 17 |                          |       |       |               |           |
| 18 | Underweight              | 7037  | 7.58  | 106(99-110)   | 68(60-70) |
| 19 |                          |       |       |               |           |
| 20 | Normal                   | 57077 | 61.50 | 110(100-120)  | 70(61-77) |
| 21 |                          |       |       |               |           |
| 22 | Overweight               | 22235 | 23.96 | 118.(110-123) | 72(70-80) |
| 23 |                          |       |       |               |           |
| 24 | Obese                    | 6253  | 6.74  | 120(110-130)  | 79(70-80) |
| 25 |                          |       |       |               |           |
| 26 | Missing data             | 213   | 0.23  | -             | -         |
| 27 |                          |       |       |               |           |
| 28 | Years of hyperlipidemia* |       |       |               |           |
| 29 |                          |       |       |               |           |
| 30 | 0                        | 86900 | 93.63 | 110(101-120)  | 70(63-80) |
| 31 |                          |       |       |               |           |
| 32 | ~5                       | 4837  | 5.21  | 120.(110-130) | 80(70-85) |
| 33 |                          |       |       |               |           |
| 34 | ~10                      | 636   | 0.69  | 125(110-140)  | 80(70-90) |
| 35 |                          |       |       |               |           |
| 36 | >10                      | 127   | 0.14  | 128(120-140)  | 82(76-90) |
| 37 |                          |       |       |               |           |
| 38 | Missing data             | 315   | 0.34  | -             | -         |
| 39 |                          |       |       |               |           |
| 40 | Years of diabetes*       |       |       |               |           |
| 41 |                          |       |       |               |           |
| 42 | 0                        | 91886 | 99.00 | 110(102-120)  | 70(64-80) |
| 43 |                          |       |       |               |           |
| 44 | ~5                       | 625   | 0.67  | 123(110-138)  | 80(70-90) |
| 45 |                          |       |       |               |           |
| 46 | ~10                      | 164   | 0.18  | 120(110-130)  | 80(70-90) |
| 47 |                          |       |       |               |           |
| 48 | >10                      | 56    | 0.06  | 130±18        | 80(75-90) |
| 49 |                          |       |       |               |           |
| 50 | Missing data             | 84    | 0.09  | -             | -         |
| 51 |                          |       |       |               |           |
| 52 | Smoking                  |       |       |               |           |
| 53 |                          |       |       |               |           |
| 54 | Never                    | 91020 | 98.07 | 110(102-120)  | 70(64-80) |
| 55 |                          |       |       |               |           |
| 56 | <10 cigarettes/day       | 1280  | 1.38  | 110(105-120)  | 70(66-80) |
| 57 |                          |       |       |               |           |
| 58 | 10-20 cigarettes/day     | 419   | 0.45  | 110(105-120)  | 70(68-80) |
| 59 |                          |       |       |               |           |
| 60 |                          |       |       |               |           |

|                                |       |       |              |           |
|--------------------------------|-------|-------|--------------|-----------|
| >20 cigarettes/day             | 96    | 0.10  | 110(103-120) | 70(70-80) |
| Alcohol drinking               |       |       |              |           |
| Never                          | 45984 | 49.54 | 110(102-120) | 70(64-80) |
| Occasionally                   | 46263 | 49.84 | 110(102-120) | 70(64-80) |
| Often                          | 568   | 0.61  | 110(102-120) | 70(69-80) |
| Family history of hypertension |       |       |              |           |
| Yes                            | 44451 | 47.89 | 110(102-120) | 70(64-80) |
| No                             | 48364 | 52.11 | 110(102-120) | 70(64-80) |

note: \* with the missing data

<sup>a</sup>BMI was used to classify participants into categories of underweight (<18.5),normal weight (18.5 to <24), overweight (24 to <28) and obese (≥28).

BMI-body mass index,SBP-systolic blood pressure,DBP-diastolic blood pressure

## 2.2 Prevalence, awareness, treatment and control rate of hypertension in Chinese nurses according to the two edition of the guidelines

According to the 2017 ACC/AHA guideline, the prevalence of hypertension increased from 6.81% to 28.96%, and the prevalence rate was 3.25 times higher than that defined in the 2010 Chinese guideline.

The awareness rate, drug treatment rate and control rate of hypertension according to two guidelines were shown in Table 2.

**Table 2 Prevalence, awareness, treatment and control rate of hypertension**

| Participants | Diagnostic criteria for hypertension | Prevalence(95%CI)    | Awareness(95%CI) | Treatment(95%CI)   | Control(95%CI)     |
|--------------|--------------------------------------|----------------------|------------------|--------------------|--------------------|
|              | Overall                              | ≥140/90 <sup>a</sup> | 6.81(6.65- 6.97) | 57.37(57.05-57.69) | 45.30(44.98-45.62) |

|           |                 |                    |                    |                    |                    |
|-----------|-----------------|--------------------|--------------------|--------------------|--------------------|
| (N=92815) | $\geq 130/80^b$ | 28.96(28.67-29.25) | 13.50(13.28-13.72) | 10.73(10.53-10.93) | 0.81( 0.75- 0.87)  |
| Female    | $\geq 140/90^a$ | 6.28(6.12- 6.44)   | 58.52(58.20-58.84) | 46.74(46.41-47.07) | 16.10(15.86-16.34) |
| (N=89138) | $\geq 130/80^b$ | 27.41(27.12-27.70) | 13.40(13.18-13.62) | 10.77(10.57-10.97) | 0.87( 0.81- 0.93)  |
| Male      | $\geq 140/90^a$ | 19.83(18.54-21.12) | 48.56(46.94-50.18) | 34.29(32.76-35.82) | 6.31( 5.52- 7.10)  |
| (N=3677)  | $\geq 130/80^b$ | 66.41(64.88-67.94) | 14.50(13.36-15.64) | 10.28(09.30-11.26) | 0.25( 0.09- 0.41)  |

a According to the diagnostic criteria for hypertension in the 2010 Chinese guideline

b According to the diagnostic criteria for hypertension in the 2017 edition of the guideline

CI-confidence interval

### 2.3 Multi-dimensional Comparative Analysis of hypertension prevalence among nursing staff

According to the 2017 ACC/AHA guideline, the number of people with high blood pressure in nursing staff rose from 6,324 to 26,875, with a total increase of 20,551. The times of increase of hypertension prevalence in different groups according to the new guideline were shown in Table 3 .

Table 4 showed that 60.68%, 10.36%, 22.14%, and 2.90% of nurses not having an existing diagnosis of hypertension had SBP/DBP levels of <120/80 mm Hg, 120 to 129/<80 mm Hg, 130 to 139/80 to 89 mm Hg, and  $\geq 140/90$  mm Hg, respectively. Additionally, 3.91% nurses were having an existing diagnosis of hypertension. Among the nurses who didn't have an existing diagnosis of hypertension, nurses with higher BP were older and more likely to be men, overweight or obese, and tended to

1  
2  
3  
4 have hyperlipidemia for less than 10 years or diabetes for less than 5  
5  
6  
7 years.

8  
9 Table 5 showed that gender (OR 0.647, 95% CI 0.585 to 0.716,  
10  
11  $p < 0.001$ ), age (OR 0.538, 95% CI 0.520 to 0.557,  $p < 0.001$ ), BMI (OR  
12  
13 0.760, 95% CI 0.729 to 0.791,  $p < 0.001$ ), years of hyperlipidemia (OR  
14  
15 0.426, 95% CI 0.397 to 0.458,  $p < 0.001$ ) and years of diabetes (OR 0.597,  
16  
17 95% CI 0.517 to 0.690,  $p < 0.001$ ) were factors significantly associated  
18  
19 with newly diagnosed hypertension.  
20  
21  
22  
23

24  
25 The female were more likely to be newly diagnosed with hypertension  
26  
27 than male according to the 2017 ACC/AHA guideline. Besides,  
28  
29 Participants with no hyperlipidemia, no diabetes, lower age and lower  
30  
31 BMI value were more likely to be newly diagnosed with hypertension.  
32  
33  
34

35 **Table 3 Comparison of hypertension prevalence among nursing staff**

| Variable | N     | $\geq 140/90^a$ |                    | $\geq 130/80^b$ |                    | Times of increase |
|----------|-------|-----------------|--------------------|-----------------|--------------------|-------------------|
|          |       | Hypertension    | Prevalence (95%CI) | Hypertension    | Prevalence (95%CI) |                   |
| Gender   |       |                 |                    |                 |                    |                   |
| Female   | 89138 | 5595            | 6.28( 6.12-6.44)   | 24433           | 27.41(27.12-27.70) | 3.36              |
| Male     | 3677  | 729             | 19.83(18.54-21.12) | 2442            | 66.41(64.88-67.94) | 2.35              |
| Age,y*   |       |                 |                    |                 |                    |                   |
| 18-25    | 17289 | 448             | 2.59( 2.35-2.83)   | 4303            | 24.89(24.25-25.53) | 8.61              |
| 26-35    | 53799 | 2263            | 4.21( 4.04-        | 13532           | 25.15(24.78-25.52) | 4.97              |

|    |                       |       |      |               |       |                    |      |
|----|-----------------------|-------|------|---------------|-------|--------------------|------|
| 1  |                       |       |      |               |       |                    |      |
| 2  |                       |       |      |               |       |                    |      |
| 3  |                       |       |      |               |       |                    |      |
| 4  |                       |       |      | 4.38)         |       |                    |      |
| 5  |                       |       |      |               |       |                    |      |
| 6  |                       |       |      | 11.90(11.38-1 |       |                    |      |
| 7  | 36-45                 | 14989 | 1784 |               | 5284  | 35.25(34.49-36.01) | 1.96 |
| 8  |                       |       |      | 2.42)         |       |                    |      |
| 9  |                       |       |      |               |       |                    |      |
| 10 |                       |       |      | 27.07(25.98-2 |       |                    |      |
| 11 | 46-55                 | 6376  | 1726 |               | 3524  | 55.27(54.05-56.49) | 1.04 |
| 12 |                       |       |      | 8.16)         |       |                    |      |
| 13 |                       |       |      |               |       |                    |      |
| 14 |                       |       |      | 36.40(30.44-4 |       |                    |      |
| 15 | 56-65                 | 250   | 91   |               | 185   | 74.00(68.56-79.44) | 1.03 |
| 16 |                       |       |      | 2.36)         |       |                    |      |
| 17 |                       |       |      |               |       |                    |      |
| 18 | BMI,kg/m <sup>2</sup> |       |      |               |       |                    |      |
| 19 | C*                    |       |      |               |       |                    |      |
| 20 |                       |       |      |               |       |                    |      |
| 21 |                       |       |      |               |       |                    |      |
| 22 |                       |       |      | 2.17( 1.83-   |       |                    |      |
| 23 | Underweight           | 7037  | 153  |               | 1028  | 14.61(13.78-15.44) | 5.73 |
| 24 |                       |       |      | 2.51)         |       |                    |      |
| 25 |                       |       |      |               |       |                    |      |
| 26 |                       |       |      | 4.38( 4.21-   |       |                    |      |
| 27 | Normal                | 57077 | 2501 |               | 13552 | 23.74(23.39-24.09) | 4.42 |
| 28 |                       |       |      | 4.55)         |       |                    |      |
| 29 |                       |       |      |               |       |                    |      |
| 30 |                       |       |      | 11.36(10.94-1 |       |                    |      |
| 31 | Overweight            | 22235 | 2527 |               | 8941  | 40.21(39.57-40.85) | 2.54 |
| 32 |                       |       |      | 1.78)         |       |                    |      |
| 33 |                       |       |      |               |       |                    |      |
| 34 |                       |       |      | 17.91(16.96-1 |       |                    |      |
| 35 | Obese                 | 6253  | 1120 |               | 3280  | 52.45(51.21-53.69) | 1.93 |
| 36 |                       |       |      | 8.86)         |       |                    |      |
| 37 |                       |       |      |               |       |                    |      |
| 38 | Years of              |       |      |               |       |                    |      |
| 39 | hyperlipide           |       |      |               |       |                    |      |
| 40 | mia*                  |       |      |               |       |                    |      |
| 41 |                       |       |      |               |       |                    |      |
| 42 |                       |       |      |               |       |                    |      |
| 43 |                       |       |      |               |       |                    |      |
| 44 |                       |       |      | 5.15( 5.00-   |       |                    |      |
| 45 | 0                     | 86900 | 4473 |               | 23495 | 27.04(26.74-27.34) | 4.25 |
| 46 |                       |       |      | 5.30)         |       |                    |      |
| 47 |                       |       |      |               |       |                    |      |
| 48 |                       |       |      | 29.58(28.29-3 |       |                    |      |
| 49 | ~5                    | 4837  | 1431 |               | 2712  | 56.07(54.67-57.47) | 0.90 |
| 50 |                       |       |      | 0.87)         |       |                    |      |
| 51 |                       |       |      |               |       |                    |      |
| 52 |                       |       |      | 45.91(42.04-4 |       |                    |      |
| 53 | ~10                   | 636   | 292  |               | 417   | 65.57(61.88-69.26) | 0.43 |
| 54 |                       |       |      | 9.78)         |       |                    |      |
| 55 |                       |       |      |               |       |                    |      |
| 56 |                       |       |      | 48.03(39.34-5 |       |                    |      |
| 57 | >10                   | 127   | 61   |               | 95    | 74.80(67.25-82.35) | 0.56 |
| 58 |                       |       |      | 6.72)         |       |                    |      |
| 59 |                       |       |      |               |       |                    |      |
| 60 |                       |       |      |               |       |                    |      |

Years of  
diabetes\*

|                             |       |      |                        |       |                    |      |
|-----------------------------|-------|------|------------------------|-------|--------------------|------|
| 0                           | 91886 | 5951 | 6.48( 6.32-<br>6.64)   | 26285 | 28.61(28.32-28.90) | 3.42 |
| ~5                          | 625   | 270  | 43.20(39.32-4<br>7.08) | 413   | 66.08(62.37-69.79) | 0.53 |
| ~10                         | 164   | 64   | 39.02(31.55-4<br>6.49) | 99    | 60.37(52.88-67.86) | 0.55 |
| >10                         | 56    | 30   | 53.57(40.51-6<br>6.63) | 45    | 80.36(69.95-90.77) | 0.50 |
| Smoking                     |       |      |                        |       |                    |      |
| Never                       | 91020 | 6200 | 6.81( 6.65-<br>6.97)   | 26290 | 28.88(28.59-29.17) | 3.24 |
| <10<br>cigarettes/da<br>y   | 1280  | 87   | 6.80( 5.42-<br>8.18)   | 415   | 32.42(29.86-34.98) | 3.77 |
| 10-20<br>cigarettes/da<br>y | 419   | 32   | 7.64( 5.10-10.<br>18)  | 139   | 33.17(28.66-37.68) | 3.34 |
| >20<br>cigarettes/da<br>y   | 96    | 5    | 5.21( 0.76-<br>9.66)   | 31    | 32.29(22.94-41.64) | 5.20 |
| Alcohol<br>drinking         |       |      |                        |       |                    |      |
| Never                       | 45984 | 3085 | 6.71( 6.48-<br>6.94)   | 13226 | 28.76(28.35-29.17) | 3.29 |
| Occasionally                | 46263 | 3194 | 6.90( 6.67-<br>7.13)   | 13463 | 29.10(28.69-29.51) | 3.22 |

|                                |       |      |                   |       |                    |      |
|--------------------------------|-------|------|-------------------|-------|--------------------|------|
| Often                          | 568   | 45   | 7.92( 5.70-10.14) | 186   | 32.75(28.89-36.61) | 3.14 |
| Family history of hypertension |       |      |                   |       |                    |      |
| Yes                            | 44451 | 2967 | 6.67( 6.44-6.90)  | 12743 | 28.67(28.25-29.09) | 3.30 |
| No                             | 48364 | 3357 | 6.94( 6.71-7.17)  | 14132 | 29.22(28.81-29.63) | 3.21 |

\* with the missing data

a According to the diagnostic criteria for hypertension in 2010 Chinese guideline

b According to the diagnostic criteria for hypertension in the 2017 edition of the guideline

c BMI was classified into underweight (<18.5),normal weight (18.5 to <24), overweight (24 to <28) and obese (≥28).

BMI-body mass index

**Table 4 Characteristics of study participants by blood pressure levels (N=92815)**

| Variable                         | Nurses not having an existing diagnosis of hypertension |                              |                                 |                          | having an existing diagnosis of hypertension,n(%)<br>(n=3628) |
|----------------------------------|---------------------------------------------------------|------------------------------|---------------------------------|--------------------------|---------------------------------------------------------------|
|                                  | <120/80,n(%)<br>(n=56320)                               | 120-129/<80,n(%)<br>(n=9620) | 130-139/80-89,n(%)<br>(n=20551) | ≥140/90,n(%)<br>(n=2696) |                                                               |
| Percentage of study participants | 60.68<br>(60.28-61.08)                                  | 10.36<br>(9.75-10.97)        | 22.14<br>(21.57-22.71)          | 2.90<br>(2.27-3.53)      | 3.91<br>(3.28-4.54)                                           |
| Gender                           |                                                         |                              |                                 |                          |                                                               |
| Female                           | 55669(98.84)                                            | 9036(93.93)                  | 18838(91.66)                    | 2321(86.09)              | 3274(90.24)                                                   |
| Male                             | 651(1.16)                                               | 584(6.07)                    | 1713(8.34)                      | 375(13.91)               | 354(9.76)                                                     |
| Age,y*                           | 29(26-34)                                               | 30(27-35)                    | 30(26-36)                       | 31(27-40)                | 43(35-49)                                                     |
| BMI* <sup>a</sup>                |                                                         |                              |                                 |                          |                                                               |

|    |                    |              |             |              |             |             |
|----|--------------------|--------------|-------------|--------------|-------------|-------------|
| 1  |                    |              |             |              |             |             |
| 2  |                    |              |             |              |             |             |
| 3  |                    |              |             |              |             |             |
| 4  | Underweight        | 5587(9.92)   | 422(4.39)   | 875(4.26)    | 109(4.04)   | 44(1.21)    |
| 5  |                    |              |             |              |             |             |
| 6  | Normal             | 38076(67.61) | 5449(56.64) | 11051(53.77) | 1220(45.25) | 1281(35.31) |
| 7  |                    |              |             |              |             |             |
| 8  | Overweight         | 10363(18.40) | 2931(30.47) | 6414(31.21)  | 926(34.35)  | 1601(44.13) |
| 9  |                    |              |             |              |             |             |
| 10 | Obese              | 2176(3.86)   | 797(8.28)   | 2160(10.51)  | 428(15.88)  | 692(19.07)  |
| 11 |                    |              |             |              |             |             |
| 12 | Missing data       | 118(0.21)    | 21(0.22)    | 51(0.25)     | 13(0.48)    | 10(0.28)    |
| 13 |                    |              |             |              |             |             |
| 14 | Years of           |              |             |              |             |             |
| 15 |                    |              |             |              |             |             |
| 16 | hyperlipidemia*    |              |             |              |             |             |
| 17 |                    |              |             |              |             |             |
| 18 | 0                  | 54352(96.51) | 9053(94.11) | 19022(92.56) | 2373(88.02) | 2100(57.88) |
| 19 |                    |              |             |              |             |             |
| 20 | ~5                 | 1652(2.93)   | 473(4.92)   | 1281(6.23)   | 251(9.31)   | 1180(32.52) |
| 21 |                    |              |             |              |             |             |
| 22 | ~10                | 167(0.30)    | 52(0.54)    | 125(0.61)    | 39(1.45)    | 253(6.97)   |
| 23 |                    |              |             |              |             |             |
| 24 | >10                | 26(0.05)     | 6(0.06)     | 34(0.17)     | 1(0.04)     | 60(1.65)    |
| 25 |                    |              |             |              |             |             |
| 26 | Missing data       | 123(0.22)    | 36(0.37)    | 89(0.43)     | 32(1.19)    | 35(0.96)    |
| 27 |                    |              |             |              |             |             |
| 28 | Years of diabetes* |              |             |              |             |             |
| 29 |                    |              |             |              |             |             |
| 30 | 0                  | 56053(99.53) | 9548(99.25) | 20334(98.94) | 2649(98.26) | 3302(91.01) |
| 31 |                    |              |             |              |             |             |
| 32 | ~5                 | 167(0.30)    | 45(0.47)    | 143(0.70)    | 31(1.15)    | 239(6.59)   |
| 33 |                    |              |             |              |             |             |
| 34 | ~10                | 47(0.08)     | 18(0.19)    | 35(0.17)     | 10(0.37)    | 54(1.49)    |
| 35 |                    |              |             |              |             |             |
| 36 | >10                | 10(0.02)     | 1(0.01)     | 15(0.07)     | 1(0.04)     | 29(0.80)    |
| 37 |                    |              |             |              |             |             |
| 38 | Missing data       | 43(0.08)     | 8(0.08)     | 24(0.12)     | 5(0.19)     | 4(0.11)     |
| 39 |                    |              |             |              |             |             |
| 40 | Smoking            |              |             |              |             |             |
| 41 |                    |              |             |              |             |             |
| 42 | Never              | 55276(98.15) | 9454(98.27) | 20090(97.76) | 2644(98.07) | 3556(98.02) |
| 43 |                    |              |             |              |             |             |
| 44 | <10 cigarettes/day | 740(1.31)    | 125(1.30)   | 328(1.60)    | 37(1.37)    | 50(1.38)    |
| 45 |                    |              |             |              |             |             |
| 46 | 10-20              |              |             |              |             |             |
| 47 | cigarettes/day     | 251(0.45)    | 29(0.30)    | 107(0.52)    | 12(0.45)    | 20(0.55)    |
| 48 |                    |              |             |              |             |             |
| 49 | >20 cigarettes/day | 53(0.09)     | 12(0.12)    | 26(0.13)     | 3(0.11)     | 2(0.06)     |
| 50 |                    |              |             |              |             |             |
| 51 | Alcohol drinking   |              |             |              |             |             |
| 52 |                    |              |             |              |             |             |
| 53 | Never              | 27936(49.60) | 4822(50.12) | 10141(49.35) | 1280(47.48) | 1805(49.75) |
| 54 |                    |              |             |              |             |             |
| 55 | Occasionally       | 28056(49.82) | 4744(49.31) | 10269(49.97) | 1402(52.00) | 1792(49.39) |
| 56 |                    |              |             |              |             |             |
| 57 | Often              | 328(0.58)    | 54(0.56)    | 141(0.69)    | 14(0.52)    | 31(0.85)    |
| 58 |                    |              |             |              |             |             |
| 59 |                    |              |             |              |             |             |
| 60 |                    |              |             |              |             |             |



Family history of  
hypertension

|                            |              |              |              |              |              |
|----------------------------|--------------|--------------|--------------|--------------|--------------|
| Yes                        | 27017(47.97) | 4691(48.76)  | 9776(47.57)  | 1259(46.70)  | 1708(47.08)  |
| No                         | 29303(52.03) | 4929(51.24)  | 10775(52.43) | 1437(53.30)  | 1920(52.92)  |
| SBP median (IQR),<br>mm Hg | 108(100-110) | 120(120-123) | 120(120-125) | 130(120-140) | 140(130-145) |
| DBP median(IQR),<br>mm Hg  | 68(60-70)    | 70(70-75)    | 80(80-80)    | 90(90-90)    | 90(85-95)    |

Participants were grouped into the higher category of SBP and DBP. For example, if a person had SBP of 142 mm Hg and DBP of 88 mm Hg, she/he was grouped into the  $\geq 140/90$  mm Hg category.

\* with the missing data

<sup>a</sup> BMI was used to classify participants into categories of underweight ( $<18.5$ ), normal weight (18.5 to  $<24$ ), overweight (24 to  $<28$ ) and obese ( $\geq 28$ ).

BMI-body mass index; SBP-systolic blood pressure; DBP-diastolic blood pressure

**Table 5 Multiple logistic regression of factors associated with newly diagnosed hypertension**

| Variables                  | OR    | 95% CI         | P        |
|----------------------------|-------|----------------|----------|
| Gender                     | 0.647 | 0.585 to 0.716 | $<0.001$ |
| Age,y                      | 0.538 | 0.520 to 0.557 | $<0.001$ |
| BMI,kg/m <sup>2</sup>      | 0.760 | 0.729 to 0.791 | $<0.001$ |
| Years of<br>hyperlipidemia | 0.426 | 0.397 to 0.458 | $<0.001$ |
| Years of diabetes          | 0.597 | 0.517 to 0.690 | $<0.001$ |
| Smoking                    | 1.070 | 0.921 to 1.243 | 0.379    |

|                                |       |                |       |
|--------------------------------|-------|----------------|-------|
| Alcohol drinking               | 0.962 | 0.906 to 1.022 | 0.210 |
| Family history of hypertension | 0.946 | 0.890 to 1.006 | 0.077 |

---

BMI-body mass index,OR-odds ratio,CI-confidence interval

## ***Discussion***

At present, there were few studies on the current status of hypertension among nurses. This study was a cross-sectional survey based on a large sample of nursing staff. The final analysis included 92815 participants from 512 medical institutions in 13 cities in Hebei province. According to the 2010 Chinese guideline, the prevalence rate of hypertension was 6.81% in this study. Li *et al*<sup>[20]</sup> investigated 4032 cardiovascular physicians from 386 hospitals in China and found that the prevalence of hypertension among them was 13.1%. Liu *et al*<sup>[21]</sup> analyzed the prevalence of hypertension among 1369 medical staffs in a tertiary academic hospital in Zhengzhou, and the prevalence of hypertension was 18.33%. The prevalence of hypertension in this survey was lower than the above results, which may be related to the lower age and the greater proportion of women of nursing staffs. The report of China Health and Family Planning Commission indicated that the awareness rate of hypertension among people over 18 years old in China was 46.5%, the drug treatment rate was 41.1%, and the control rate was 13.8% in 2012<sup>[22]</sup>. In addition, a survey<sup>[23]</sup> of 174,621 people aged 18 years or older in 31

1  
2  
3  
4 provinces in China from 2013 to 2014 showed that the awareness,  
5  
6 treatment and control rate were 31.9%, 26.4% and 9.7%, respectively.  
7  
8  
9 Lixin Jiang *et al*<sup>[24]</sup> organized a population-based screening hypertension  
10  
11 project enrolling around 1.7 million adults aged 35-75 years from all 31  
12  
13 provinces in mainland China. The rates of hypertension prevalence,  
14  
15 awareness, treatment, and control were 37.2%, 36.0% , 22.9% and 5.7% ,  
16  
17 respectively. In this survey, the awareness rate of hypertension in nursing  
18  
19 staff was 57.37%, the rate of treatment was 45.30%, and the control rate  
20  
21 was 14.97%, which were all higher than the above results. However, the  
22  
23 control rate of hypertension among female nurses was 16.10%, and  
24  
25 among male nursing staff was only 6.31%. For medical workers, the  
26  
27 awareness rate and drug treatment rate of hypertension should have been  
28  
29 higher. There was still large space for improvement in the awareness rate  
30  
31 of hypertension.  
32  
33  
34  
35  
36  
37  
38  
39

40  
41 In this study, we sought to assess the potential impact of the new  
42  
43 hypertension guideline on the status of blood pressure in clinical nurses.  
44  
45 According to the 2017 ACC/AHA guideline, the hypertension prevalence  
46  
47 rate of nursing personnel in the survey increased to 28.96%, which  
48  
49 increased 4.15 times among nurses under the 45 years old and 1.04 times  
50  
51 among nurses of 45 years of age or older. The prevalence rate of the  
52  
53 population with no hyperlipidemia, no diabetes, lower age and BMI value  
54  
55 increased, suggested that more low-risk population would be diagnosed  
56  
57  
58  
59  
60

1  
2  
3  
4 with hypertension. Meanwhile, the awareness rate, drug treatment rate  
5  
6 and control rate of hypertension among Chinese nurses decreased from  
7  
8 57.37%, 45.30% and 14.97% to 13.50%, 10.73% and 0.81%,  
9  
10 respectively.  
11  
12

13  
14 A study from South Korea showed that the prevalence of hypertension  
15  
16 was 49.2% based on the 2017 ACC/AHA guideline, while the number  
17  
18 was 30.4% based on the previous guideline, the control rate decreased  
19  
20 from 59.5% to 16.1%<sup>[25]</sup>. Additionally, a study from Nepal found that if  
21  
22 the ACC/AHA guideline was applied, the overall prevalence of  
23  
24 hypertension in Nepal would be approximately double (from 21.2% to  
25  
26 44.2%)<sup>[26]</sup>. According to the standards of the new guideline, the  
27  
28 prevalence of hypertension among nurses in China was lower than the  
29  
30 above two studies, which might be related to the fact that most of the  
31  
32 nurses were female, lower in age level, and had more medical knowledge  
33  
34 and resources. In addition, the difference could be due to several factors,  
35  
36 including Nepal's predominantly rural population and low income.  
37  
38 However, it is worth noting that the hypertension control rate among  
39  
40 nurses according to the new standard is very low, only 0.81%. It had been  
41  
42 reported that treatment of hypertension could reduce the risk of stroke  
43  
44 and myocardial infarction by 30-43% and 15%, respectively, along with  
45  
46 reducing the risk of a number of other chronic conditions<sup>[27-29]</sup>.  
47  
48 Consequently, the nursing staff should pay more attention to the  
49  
50  
51  
52  
53  
54  
55  
56  
57  
58  
59  
60

1  
2  
3  
4 management of blood pressure. Improving the lifestyle and monitoring  
5  
6 the blood pressure regularly were suggested to control the blood pressure  
7  
8 in a reasonable range.  
9

10  
11 The new guideline generally recommends using of BP-lowering  
12 medications for secondary prevention of CVD in patients with clinical  
13 CVD (CHD, HF, and stroke) and an average BP  $\geq 130/80$  mm Hg and for  
14 primary prevention of CVD in adults with an estimated 10-year ASCVD  
15 risk of  $\geq 10\%$  and an average SBP  $\geq 130$  mm Hg or an average DBP  $\geq 80$   
16 mm Hg. Despite the fact that the number of nursing staff who need the  
17 medication treatment is speculated to increase according to the new  
18 guideline, they should take both their own conditions and medical history  
19 into consideration to make a a reasonable judgment on whether it is  
20 necessary and proper for them to take the medicine.  
21  
22  
23  
24  
25  
26  
27  
28  
29  
30  
31  
32  
33  
34  
35  
36

37 Meanwhile, the ACC/AHA guideline would require expansion of the  
38 necessary public health infrastructure to manage the substantial increase  
39 in the public health burden of hypertension in China. Different countries  
40 have different epidemiological characteristics, genetic background,  
41 disease control and economic levels. More facts founded on  
42 evidence-based medicine is needed to confirm whether the new guideline  
43 is applicable to China, how to determine the boundary value of  
44 hypertension, and whether lowering hypertension diagnosis standard to  
45 130/80mmhg can improve the prognosis. The number of hypertension  
46  
47  
48  
49  
50  
51  
52  
53  
54  
55  
56  
57  
58  
59  
60

1  
2  
3  
4 patients in China is huge and the medical resources are relatively  
5  
6 insufficient. The report of Chinese Center for Disease Control and  
7  
8 Prevention in 2013 pointed out that the number of hypertension in China  
9  
10 had risen to 330 million in 2010, and the direct economic burden caused  
11  
12 by hypertension reached 210.3 billion yuan in 2013, accounting for  
13  
14 6.61% of the total health cost in China. The number of people with high  
15  
16 blood pressure in China will rise by a large margin according to the new  
17  
18 guidelines, which poses more severe challenges to medical and health  
19  
20 resources.  
21  
22  
23  
24  
25

### 26 27 ***Limitation*** 28

29  
30 Some limitations should be considered when interpreting our data. First  
31  
32 of all, this survey used the average blood pressure measured 2 times on  
33  
34 the same day, which may lead to false positive diagnosis, resulting in  
35  
36 overestimation of the prevalence rate. Secondly, the blood pressure was  
37  
38 measured by nurses themselves rather than the staff trained unifiedly, but  
39  
40 all nurses had received professional knowledge of blood pressure  
41  
42 measurement. In addition, a unified description of the measurement  
43  
44 methods and matters of attention were carried out in the study, which  
45  
46 could ensure the reliability of the measurement results. Thirdly, because  
47  
48 of the difference of blood pressure measuring instruments, it may have  
49  
50 some effect on the data, but the sphygmomanometer had been tested and  
51  
52 corrected. The blood pressure measurement in the survey was carried out  
53  
54  
55  
56  
57  
58  
59  
60

1  
2  
3  
4 according to international measurement and quality control regulations,  
5  
6 which could guarantee the reliability of the measurement results.  
7  
8  
9 Furthermore, the small proportion of men and nurses over 55 years old in  
10  
11 this study may have some influence on the study results. Finally, the  
12  
13 generalizability of our results may be restricted because the participants  
14  
15 being recruited were from only one province in China. Future studies  
16  
17 should be carried out to recruit participants from other cities in China.  
18  
19  
20  
21

### 22 ***Acknowledgment***

23  
24 This project was supported by the Hebei provincial Science and  
25  
26 Technology Department (162777166).  
27  
28

29  
30 ***Contributors:*** WC conceived the study, WC, BZ, YMH and YJZ designed  
31  
32 the study, drafted the manuscript, or critically revised the manuscript for  
33  
34 important intellectual content. J Li, XMC, XLY, AFZ, RFJ, RQZ, ALF,  
35  
36 YW, MJY, LT, SLC, JC and MZZ conducted the research and collected  
37  
38 data, J Liu, DF and MHX analyzed the data, WC, BZ, J Liu, YMH and DF  
39  
40 wrote the this article. All authors gave final approval of the version to be  
41  
42 published and are accountable for all aspects of the work in ensuring that  
43  
44 questions related to the accuracy or integrity of any part of the work are  
45  
46 appropriately investigated and resolved. WC is the corresponding author  
47  
48 and guarantor.  
49  
50  
51  
52  
53

54  
55 ***Competing interests:*** All authors have completed the ICMJE uniform  
56  
57 disclosure form at [www.icmje.org/coi\\_disclosure.pdf](http://www.icmje.org/coi_disclosure.pdf) (available on  
58  
59  
60

1  
2  
3  
4 request from the corresponding author). No financial relationships with  
5  
6 any organizations that might have an interest in the submitted work in the  
7  
8 previous three years; no other relationships or activities that could appear  
9  
10 to have influenced the submitted work.  
11  
12

13  
14 **Ethical approval:**The protocol was reviewed and approved by the  
15  
16 Research Ethics Committee of the Second Hospital of Hebei Medical  
17  
18 University(No 2016225).  
19  
20

21  
22 **Transparency statement:** The guarantor (BZ) affirms that the manuscript  
23  
24 is an honest, accurate, and transparent account of the study being reported;  
25  
26 that no important aspects of the study have been omitted; and that any  
27  
28 discrepancies from the study as planned (and, if relevant, registered) have  
29  
30 been explained.  
31  
32

33  
34  
35 **Data sharing:**No additional data available.  
36  
37

38  
39 **Funding:**This project was supported by the Hebei provincial Science and  
40  
41 Technology Department (162777166).  
42

43  
44 **Exclusive licence:**The Corresponding Author has the right to grant on  
45  
46 behalf of all authors and does grant on behalf of all authors, a worldwide  
47  
48 licence to the Publishers and its licensees in perpetuity, in all forms,  
49  
50 formats and media (whether known now or created in the future), to i)  
51  
52 publish, reproduce, distribute, display and store the Contribution, ii)  
53  
54 translate the Contribution into other languages, create adaptations,  
55  
56 reprints, include within collections and create summaries, extracts and/or,  
57  
58  
59  
60



1  
2  
3  
4 abstracts of the Contribution, iii) create any other derivative work(s)  
5  
6 based on the Contribution, iv) to exploit all subsidiary rights in the  
7  
8 Contribution, v) the inclusion of electronic links from the Contribution to  
9  
10 third party material where-ever it may be located; and, vi) licence any  
11  
12 third party to do any or all of the above.  
13  
14  
15  
16  
17  
18  
19  
20  
21  
22  
23

## 24 25 26 27 28 29 30 31 32 33 34 35 36 37 38 39 40 41 42 43 44 45 46 47 48 49 50 51 52 53 54 55 56 57 58 59 60

- [1] Agnoletti D, Valbusa F, Labat C, Gautier S, Mourad JJ, Benetos A. Evidence for a Prognostic Role of Orthostatic Hypertension on Survival in a Very Old Institutionalized Population. *Hypertension*. 2016. 67(1): 191-196.
- [2] Chen W, Gao R, Liu L, et al. China cardiovascular disease report 2015. *Chinese Circulation Journal*. 2016. 31(06): 521-528.
- [3] Lewington S, Lacey B, Clarke R, et al. The Burden of Hypertension and Associated Risk for Cardiovascular Mortality in China. *JAMA Intern Med*. 2016. 176(4): 524-532.
- [4] Chen W, Gao R, Liu L, et al. China cardiovascular disease report 2017. *Chinese Circulation Journal*. 2018. 33(01): 1-8.
- [5] Qi SF, Zhang B, Wang HJ, et al. Prevalence of hypertension subtypes in 2011 and the trends from 1991 to 2011 among Chinese adults. *J Epidemiol Community Health*. 2016. 70(5): 444-451.
- [6] Liang Y, Liu R, Du S, Qiu C. Trends in incidence of hypertension in Chinese adults, 1991-2009: the China Health and Nutrition Survey. *Int J Cardiol*. 2014. 175(1): 96-101.
- [7] Whelton PK, Carey RM, Aronow WS, et al. 2017 ACC/AHA/AAPA/ABC/ACPM/AGS/APhA/ASH/ASPC/NMA/PCNA Guideline for the Prevention, Detection, Evaluation, and Management of High Blood Pressure in Adults: A Report of the American College of Cardiology/American Heart Association Task Force on Clinical Practice Guidelines. *J Am Coll Cardiol*. 2017 .
- [8] Kario K. Global Impact of 2017 American Heart Association/American College of Cardiology

- 1  
2  
3  
4 Hypertension Guidelines A Perspective From Japan. *Circulation*. 2018. 137(6): 543-545.
- 5  
6 [9] Gurpreet SW, C.Venkata S.Ram. Global Impact of 2017 American Heart Association/American  
7 College of Cardiology Hypertension Guidelines A Perspective From India. *Circulation*. 2018.  
8  
9 137(6): 549–550.
- 10  
11 [10] Wang J, Liu Ls. Global Impact of 2017 American College of Cardiology/American Heart  
12 Association Hypertension Guidelines A Perspective From China. *Circulation*. 2018. 137(6):  
13  
14 546-548.
- 15  
16 [11] Wang Z, Chen Z, Zhang L, et al. Status of Hypertension in China: Results from the China  
17 Hypertension Survey, 2012-2015. *Circulation*. 2018 .137(22):2344-2356.
- 18  
19 [12] Khera R, Lu Y, Lu J, et al. Impact of 2017 ACC/AHA guidelines on prevalence of hypertension and  
20 eligibility for antihypertensive treatment in United States and China: nationally representative cross  
21 sectional study. *BMJ*. 2018. 362: k2357.
- 22  
23 [13] Li D, Zeng X, Huang Y, et al. Increased Risk of Hypertension in Young Adults in Southwest China:  
24 Impact of the 2017 ACC/AHA High Blood Pressure Guideline. *Curr Hypertens Rep*. 2019. 21(3):  
25  
26 21.
- 27  
28 [14] Li D, Huang J, Tang L, Wang J, Jia H. Characteristics of Job Stressors , Fatigue and Change of  
29 Blood Pressure , Blood Glucose and Lipid among ICU NRISES. *Nurs J Chin PLA*. 2012. 29(07):  
30  
31 1-4.
- 32  
33 [15] Lo SH, Lin LY, Hwang JS, Chang YY, Liao CS, Wang JD. Working the night shift causes  
34 increased vascular stress and delayed recovery in young women. *Chronobiol Int*. 2010. 27(7):  
35  
36 1454-1468.
- 37  
38 [16] Guo J, Zhu YC, Chen YP, Hu Y, Tang XW, Zhang B. The dynamics of hypertension prevalence,  
39 awareness, treatment, control and associated factors in Chinese adults: results from CHNS  
40  
41 1991-2011. *J Hypertens*. 2015. 33(8): 1688-1696.
- 42  
43 [17] Afridi HI, Talpur FN, Kazi TG, Brabazon D. Assessment of toxic elements in the samples of  
44 different cigarettes and their effect on the essential elemental status in the biological samples of  
45  
46 Irish hypertensive consumers. *J Hum Hypertens*. 2015. 29(5): 309-315.
- 47  
48 [18] Sun J, Buys NJ, Hills AP. Dietary pattern and its association with the prevalence of obesity,  
49  
50 hypertension and other cardiovascular risk factors among Chinese older adults. *Int J Environ Res*  
51  
52  
53  
54  
55  
56  
57  
58  
59  
60  
Public Health. 2014. 11(4): 3956-3971.

- 1  
2  
3  
4 [19] Ahn S, Zhao H, Smith ML, Ory MG, Phillips CD. BMI and lifestyle changes as correlates to  
5 changes in self-reported diagnosis of hypertension among older Chinese adults. *J Am Soc*  
6 *Hypertens.* 2011. 5(1): 21-30.  
7  
8  
9 [20] Li S, Yu J, Zhang L, Zhan Y, Zhang F, Hu D. Hypertension and cardiovascular risk evaluation of  
10 Chinese cardiovascular physicians. *Chin J Cardiol.* 2011. 39(3): 254-258.  
11  
12 [21] Liu M, Wang D, Hao Y, Shen M, Xie D. Risk Factors of Hypertension in Medical Staff in a  
13 Three-A Level Hospital in Zhengzhou. *Evaluation and analysis of drug-use in hospitals of China.*  
14 2015. 15(02): 267-269.  
15  
16 [22] Commission CHaFP. Report on nutrition and chronic diseases in China (2015). 2015. Beijing.  
17 People's Medical Publishing House. 33-50.  
18  
19 [23] Li Y, Yang L, Wang L, et al. Burden of hypertension in China: A nationally representative survey  
20 of 174,621 adults. *Int J Cardiol.* 2017. 227: 516-523.  
21  
22 [24] Lu J, Lu Y, Wang X, et al. Prevalence, awareness, treatment, and control of hypertension in China:  
23 data from 1.7 million adults in a population-based screening study (China PEACE Million Persons  
24 Project). *Lancet.* 2017. 390(10112): 2549-2558.  
25  
26 [25] Lee, Ji Hyun, et al. Blood Pressure Control and Cardiovascular Outcomes: Realworld Implications  
27 of the 2017 ACC/AHA Hypertension Guideline. *Scientific reports.* 2018.8:13155.  
28  
29 [26] Watkins, David A. Implication of the 2017 ACC/AHA Hypertension Guideline  
30 for Public Health in Nepal. *JAMA Network Open.* 2018. 1(3): e180778-e180778.  
31  
32 [27] Lemstra M, Alsabbagh MW. Proportion and risk indicators of nonadherence to antihypertensive  
33 therapy: a meta-analysis. *Patient Prefer Adherence.* 2014. 8: 211-218.  
34  
35 [28] Wang W, Lau Y, Loo A, Chow A, Thompson DR. Medication adherence and its associated factors  
36 among Chinese community-dwelling older adults with hypertension. *Heart Lung.* 2014. 43(4):  
37 278-283.  
38  
39 [29] Law MR, Morris JK, Wald NJ. Use of blood pressure lowering drugs in the prevention of  
40 cardiovascular disease: meta-analysis of 147 randomised trials in the context of expectations from  
41 prospective epidemiological studies. *BMJ.* 2009. 338: b1665.  
42  
43  
44  
45  
46  
47  
48  
49  
50  
51  
52  
53  
54  
55  
56  
57  
58  
59  
60

1  
2  
3  
4  
5  
6  
7  
8  
9  
10  
11  
12  
13  
14  
15  
16  
17  
18  
19  
20  
21  
22  
23  
24  
25  
26  
27  
28  
29  
30  
31  
32  
33  
34  
35  
36  
37  
38  
39  
40  
41  
42  
43  
44  
45  
46  
47  
48  
49  
50  
51  
52  
53  
54  
55  
56  
57  
58  
59  
60

For peer review only

STROBE Statement—Checklist of items that should be included in reports of *cross-sectional studies*

|                           | Item No | Recommendation                                                                                                                                                                                    |                                     |
|---------------------------|---------|---------------------------------------------------------------------------------------------------------------------------------------------------------------------------------------------------|-------------------------------------|
| <b>Title and abstract</b> | 1       | (a) Indicate the study's design with a commonly used term in the title or the abstract                                                                                                            | Title and the 2nd segment of Page 4 |
|                           |         | (b) Provide in the abstract an informative and balanced summary of what was done and what was found                                                                                               | Page3, Page 4 and Page 5            |
| <b>Introduction</b>       |         |                                                                                                                                                                                                   |                                     |
| Background/rationale      | 2       | Explain the scientific background and rationale for the investigation being reported                                                                                                              | Page 6                              |
| Objectives                | 3       | State specific objectives, including any prespecified hypotheses                                                                                                                                  | the 2nd segment of Page 7           |
| <b>Methods</b>            |         |                                                                                                                                                                                                   |                                     |
| Study design              | 4       | Present key elements of study design early in the paper                                                                                                                                           | page 8                              |
| Setting                   | 5       | Describe the setting, locations, and relevant dates, including periods of recruitment, exposure, follow-up, and data collection                                                                   | Page 8                              |
| Participants              | 6       | (a) Give the eligibility criteria, and the sources and methods of selection of participants                                                                                                       | Page 9 and Page10                   |
| Variables                 | 7       | Clearly define all outcomes, exposures, predictors, potential confounders, and effect modifiers. Give diagnostic criteria, if applicable                                                          | Page 12                             |
| Data sources/measurement  | 8*      | For each variable of interest, give sources of data and details of methods of assessment (measurement). Describe comparability of assessment methods if there is more than one group              | Page 8 and page 10                  |
| Bias                      | 9       | Describe any efforts to address potential sources of bias                                                                                                                                         | Page 10 and page 11                 |
| Study size                | 10      | Explain how the study size was arrived at                                                                                                                                                         | Page 8                              |
| Quantitative variables    | 11      | Explain how quantitative variables were handled in the analyses. If applicable, describe which groupings were chosen and why                                                                      | Page 12                             |
| Statistical methods       | 12      | (a) Describe all statistical methods, including those used to control for confounding                                                                                                             | Page 12                             |
|                           |         | (b) Describe any methods used to examine subgroups and interactions                                                                                                                               | N/A                                 |
|                           |         | (c) Explain how missing data were addressed                                                                                                                                                       | the 2nd sentence of Page 8          |
|                           |         | (d) If applicable, describe analytical methods taking account of sampling strategy                                                                                                                | N/A                                 |
|                           |         | (e) Describe any sensitivity analyses                                                                                                                                                             | N/A                                 |
| <b>Results</b>            |         |                                                                                                                                                                                                   |                                     |
| Participants              | 13*     | (a) Report numbers of individuals at each stage of study—eg numbers potentially eligible, examined for eligibility, confirmed eligible, included in the study, completing follow-up, and analysed | N/A                                 |
|                           |         | (b) Give reasons for non-participation at each stage                                                                                                                                              | N/A                                 |
|                           |         | (c) Consider use of a flow diagram                                                                                                                                                                | N/A                                 |
| Descriptive               | 14*     | (a) Give characteristics of study participants (eg demographic,                                                                                                                                   | Table 1                             |

|    |                          |     |                                                                   |                              |
|----|--------------------------|-----|-------------------------------------------------------------------|------------------------------|
| 1  |                          |     |                                                                   |                              |
| 2  | data                     |     | clinical, social) and information on exposures and potential      |                              |
| 3  |                          |     | confounders                                                       |                              |
| 4  |                          |     |                                                                   |                              |
| 5  |                          |     | (b) Indicate number of participants with missing data for each    | Table 1                      |
| 6  |                          |     | variable of interest                                              |                              |
| 7  | Outcome data             | 15* | Report numbers of outcome events or summary measures              | Table 2 and Table 3          |
| 8  | Main results             | 16  | (a) Give unadjusted estimates and, if applicable, confounder-     | Table 2 and Table 3          |
| 9  |                          |     | adjusted estimates and their precision (eg, 95% confidence        |                              |
| 10 |                          |     | interval). Make clear which confounders were adjusted for and     |                              |
| 11 |                          |     | why they were included                                            |                              |
| 12 |                          |     |                                                                   |                              |
| 13 |                          |     | (b) Report category boundaries when continuous variables          | Table 1 、 Table 3、 Table4    |
| 14 |                          |     | were categorized                                                  |                              |
| 15 |                          |     |                                                                   |                              |
| 16 |                          |     | (c) If relevant, consider translating estimates of relative risk  | N/A                          |
| 17 |                          |     | into absolute risk for a meaningful time period                   |                              |
| 18 | Other analyses           | 17  | Report other analyses done—eg analyses of subgroups and           | Table 5                      |
| 19 |                          |     | interactions, and sensitivity analyses                            |                              |
| 20 |                          |     |                                                                   |                              |
| 21 | <b>Discussion</b>        |     |                                                                   |                              |
| 22 | Key results              | 18  | Summarise key results with reference to study objectives          | Page 22, Page 23 and Page 24 |
| 23 | Limitations              | 19  | Discuss limitations of the study, taking into account sources of  | Page 26 and Page 27          |
| 24 |                          |     | potential bias or imprecision. Discuss both direction and         |                              |
| 25 |                          |     | magnitude of any potential bias                                   |                              |
| 26 |                          |     |                                                                   |                              |
| 27 | Interpretation           | 20  | Give a cautious overall interpretation of results considering     | Page 25 and Page 26          |
| 28 |                          |     | objectives, limitations, multiplicity of analyses, results from   |                              |
| 29 |                          |     | similar studies, and other relevant evidence                      |                              |
| 30 |                          |     |                                                                   |                              |
| 31 | Generalisability         | 21  | Discuss the generalisability (external validity) of the study     | the last sentence of Page 26 |
| 32 |                          |     | results                                                           |                              |
| 33 |                          |     |                                                                   |                              |
| 34 | <b>Other information</b> |     |                                                                   |                              |
| 35 | Funding                  | 22  | Give the source of funding and the role of the funders for the    | Page 28                      |
| 36 |                          |     | present study and, if applicable, for the original study on which |                              |
| 37 |                          |     | the present article is based                                      |                              |
| 38 |                          |     |                                                                   |                              |
| 39 |                          |     |                                                                   |                              |

\*Give information separately for exposed and unexposed groups.

**Note:** An Explanation and Elaboration article discusses each checklist item and gives methodological background and published examples of transparent reporting. The STROBE checklist is best used in conjunction with this article (freely available on the Web sites of PLoS Medicine at <http://www.plosmedicine.org/>, Annals of Internal Medicine at <http://www.annals.org/>, and Epidemiology at <http://www.epidem.com/>). Information on the STROBE Initiative is available at [www.strobe-statement.org](http://www.strobe-statement.org).
